# Supplementary material for: Iridium-catalyzed direct C–H arylation of cyclic N-sulfonyl ketimines with arylsiloxanes at ambient temperature
Source: Royal Society of Chemistry journal article supplement (doi:10.1039/d0ob01212b), 2020-01-01

## Supporting Information

### **Iridium-Catalyzed Direct C–H Arylation of Cyclic *N*-sulfonyl Ketimines with Arylsiloxanes at Ambient Temperature**

Writhabrata Sarkar,<sup>†</sup> Arup Bhowmik,<sup>†</sup> Sumit Das, Aiswarya, B. S., Aniket Mishra\* and Indubhusan Deb\*

*Organic & Medicinal Chemistry Division, Indian Institute of Chemical Biology, 4-Raja S. C. Mullick Road, Jadavpur, Kolkata-700032*

## Table of contents

|                                                                        |         |
|------------------------------------------------------------------------|---------|
| <b>General Information</b> .....                                       | S2      |
| <b>Procedure for arylation</b> .....                                   | S3-S4   |
| <b>Scope of other substrates</b> .....                                 | S4      |
| <b>Arylation under Pd and Ni catalysis</b> .....                       | S5      |
| <b>Characterization of arylated products</b> .....                     | S5-S31  |
| <b>Synthetic transformation of arylated product</b> .....              | S32-S33 |
| <b>Mechanistic experiments</b> .....                                   | S34-S38 |
| <b>References</b> .....                                                | S38     |
| <b><sup>1</sup>H and <sup>13</sup>C NMR spectra of compounds</b> ..... | S39-S87 |

### General information:

All reactions were carried out in oven-dried reaction vessels under nitrogen atmosphere unless otherwise mentioned. TLC analysis was performed on silica gel TLC plates. Column chromatography was done using 230-400 mesh silica gel by applying pressure through an air pump.  $^1\text{H}$  and  $^{13}\text{C}$  NMR spectra were recorded on 400 and 600 MHz spectrometers and are reported as chemical shifts ( $\delta$ ) in parts per million (ppm), and multiplicities are abbreviated as s = singlet, d = doublet, t = triplet, q = quartet, m = multiplet, comp = complex. Internal standards or residual solvent signals were used as reference. HRMS ( $m/z$ ) was recorded using ESI (Q-Tof, Orbitrap, positive ion) and EI (magnetic sector, positive ion) mode. Melting points were determined in a capillary melting point apparatus and are uncorrected. Single-crystal X-ray data were recorded in a diffractometer with Mo  $K\alpha$  radiation. The CIF file was submitted to CCDC (1891261, 1891262, and 2014574) and can be obtained at <https://summary.ccdc.cam.ac.uk/structure-summary-form>. Ketimines (**1a–1p**),<sup>1</sup> ketimines (**4a–4f**)<sup>2</sup> were prepared following a literature method.

## General procedure for arylation:

(milligram scale)

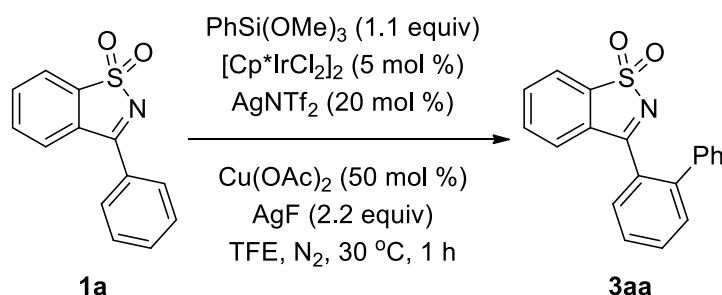

An oven dried 10 mL Schlenk tube was charged with 3-phenylbenzo[d]isothiazole 1,1-dioxide (**1a**) (48.7 mg, 0.2 mmol), trimethoxy(phenyl)silane (41  $\mu$ L, 0.22 mmol), silver (bistrifluoromethanesulfonyl)imide (15.5 mg, 20 mol %), copper acetate (18.1 mg, 50 mol %), silver fluoride (55.8 mg, 2.2 equiv) and catalyst [Cp\*IrCl<sub>2</sub>]<sub>2</sub> (8.0 mg, 5 mol %). The tube was evacuated and backfilled with nitrogen and to it was added TFE (2.0 mL, 0.1 M) under nitrogen atmosphere. The reaction mixture was degassed and backfilled with nitrogen 3 times. It was then closed with teflon-lined cap and kept at 30 °C while stirring for 1 h. After completion of the reaction, the reaction mixture was filtered through a short pad of celite, the solvent was removed under reduced pressure and the crude reaction mixture was directly purified through column chromatography on silica gel using petroleum ether:ethylacetate (7:3) as eluent to obtain 3-([1,1'-biphenyl]-2-yl)benzo[d]isothiazole 1,1-dioxide (**3aa**) in 83% (53.0 mg). Cases where the mono- and bis-arylated products were obtained as an inseparable mixture, the ratio was calculated from <sup>1</sup>H NMR.

(gram scale)

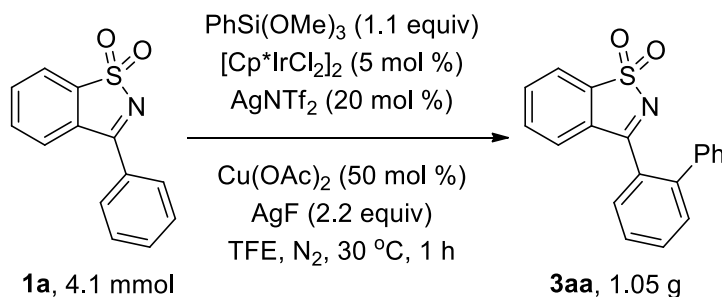

An oven dried 100 mL two-neck round bottom flask was charged with 3-phenylbenzo[d]isothiazole-1,1-dioxide (**1a**) (1.0 g, 4.1 mmol), trimethoxy(phenyl)silane (0.84 mL, 4.5 mmol), silver (bistrifluoromethanesulfonyl)imide (318.9 mg, 20 mol %),

copper acetate (372.3 mg, 50 mol %), silver fluoride (1.14 g, 2.2 equiv) and catalyst  $[\text{Cp}^*\text{IrCl}_2]_2$  (163.3 mg, 5 mol %). The flask was evacuated and backfilled with nitrogen and to it was added TFE (41 mL, 0.1 M) under nitrogen atmosphere. The reaction mixture was degassed and backfilled with nitrogen 3 times. It was then closed with a stopper and kept at 30 °C while stirring for 1 h. After completion of the reaction, the reaction mixture was filtered through a short pad of celite, the solvent was removed under reduced pressure and the crude reaction mixture was directly purified through column chromatography on silica gel using petroleum ether:ethylacetate (7:3) as eluent to obtain 3-([1,1'-biphenyl]-2-yl)benzo[d]isothiazole 1,1-dioxide (**3aa**) in 80% (1.05 g) yield.

The ratio of mono and bis products was determined by  $^1\text{H}$  NMR. The characterization data for all the mono-arylated products are given below. Compounds **3ma**, **5ea**, **5fa**, **5ab**, **5ac** were recrystallized from EtOH to get mono-arylated product exclusively.

**Table S1: Scope of other substrates**

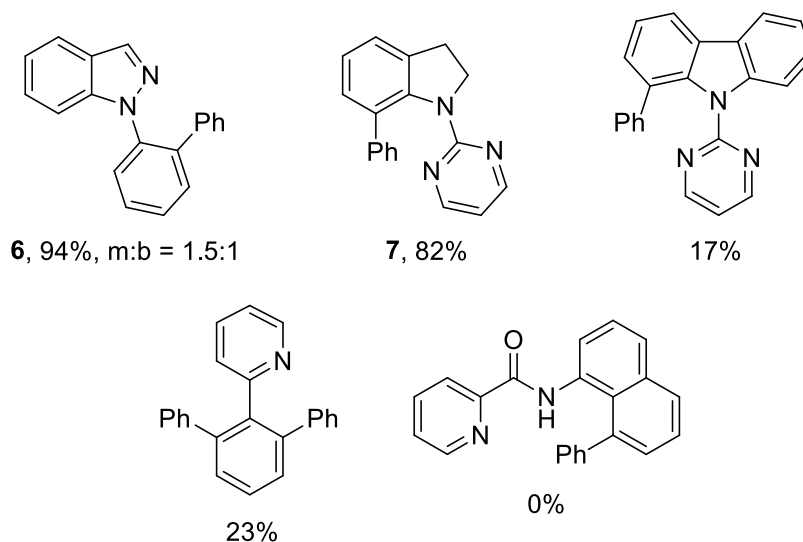

## Arylation under Pd and Ni catalysis:

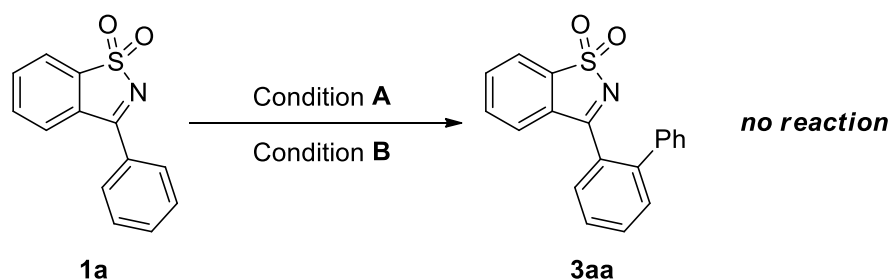

Condition **A**: **1a** (0.1 mmol, 1.0 equiv), PhSi(OMe)<sub>3</sub> (2.0 equiv), Pd(OAc)<sub>2</sub> (10 mol %), *p*-BQ (1.0 equiv), AgF (2.0 equiv), 1,4-Dioxane (1 mL), 110 °C, N<sub>2</sub>, 24 h

Condition **B**: **1a** (0.1 mmol, 1.0 equiv), PhSi(OMe)<sub>3</sub> (2.0 equiv), Pd(OAc)<sub>2</sub> (5 mol %), Cu(OTf)<sub>2</sub> (2.0 equiv), AgF (2.0 equiv), 1,4-Dioxane (2.5 mL), 110 °C, N<sub>2</sub>, 48 h

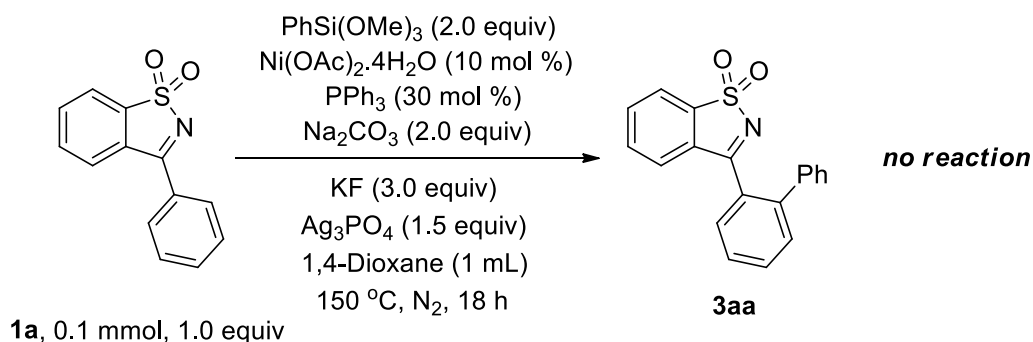

## Characterization data for arylated products:

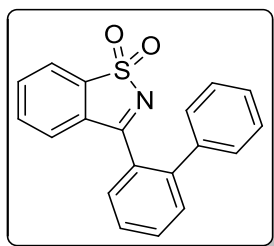

### 3-([1,1'-biphenyl]-2-yl)benzo[d]isothiazole 1,1-dioxide (**3aa**):

**Combined Yield** 83% (55 mg); **mono:bis** 5:1; colourless solid; **R<sub>f</sub>** 0.5 (petroleum ether/ethyl acetate = 7:3); **eluent composition** petroleum ether/ethyl acetate = 7:3; **mp** 130-132 °C; **<sup>1</sup>H NMR** (400 MHz, CDCl<sub>3</sub>) δ 6.92 (d, *J* = 7.6 Hz, 1H), 7.15-7.19 (m, 1H), 7.22-7.25 (comp, 2H), 7.29 (dd, *J* = 7.8 Hz, 2.2 Hz, 1H), 7.37 (app d, *J* = 8.0 Hz, 2H), 7.50 (td, *J* = 7.6 Hz, 2.0 Hz, 1H), 7.55-7.59 (m, 1H), 7.65-7.67 (m, 1H), 7.70-7.74 (comp, 2H), 7.80 (d, *J* = 7.2 Hz, 1H); **<sup>13</sup>C NMR** (100 MHz, CDCl<sub>3</sub>) δ 122.3, 126.5, 128.1, 128.4, 129.0, 129.2, 129.8, 130.1,

130.6, 131.0, 132.3, 132.9, 133.1, 139.6, 139.7, 141.5, 174.4; **HRMS** (ESI, m/z) calcd for  $C_{19}H_{13}NO_2S$   $[M+H]^+$  320.0745, found 320.0737.

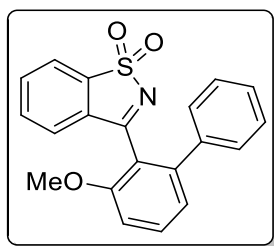

**3-(3-methoxy-[1,1'-biphenyl]-2-yl)benzo[d]isothiazole 1,1-dioxide (3ba):**

**Yield** 82% (57 mg); colourless solid; **R<sub>f</sub>** 0.6 (petroleum ether/ethyl acetate = 7:3); **eluent composition** petroleum ether/ethyl acetate = 7:3; **mp** 112-114 °C; **<sup>1</sup>H NMR** (400 MHz,  $CDCl_3$ )  $\delta$  3.81 (s, 3H), 7.07 (d,  $J$  = 8.4 Hz, 1H), 7.16 (d,  $J$  = 7.8 Hz, 2H), 7.18-7.26 (comp, 5H), 7.49 (t,  $J$  = 7.6 Hz, 1H), 7.57-7.61 (comp, 2H), 7.82 (d,  $J$  = 7.6 Hz, 1H); **<sup>13</sup>C NMR** (100 MHz,  $CDCl_3$ )  $\delta$  56.3, 110.3, 118.4, 122.3, 122.8, 125.9, 128.1, 128.6, 129.1, 132.3, 132.4, 133.0, 133.5, 139.1, 139.4, 143.3, 157.8, 172.0; **HRMS** (ESI, m/z) calcd for  $C_{20}H_{15}NO_3S$   $[M+H]^+$  350.0851, found 350.0851.

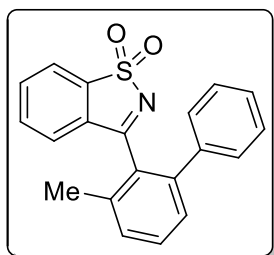

**3-(3-methyl-[1,1'-biphenyl]-2-yl)benzo[d]isothiazole 1,1-dioxide (3ca):**

**Yield** 60% (40 mg); colourless solid; **R<sub>f</sub>** 0.6 (petroleum ether/ethyl acetate = 7:3); **eluent composition** petroleum ether/ethyl acetate = 7:3; **mp** 150-152 °C (crystallization from  $CDCl_3$  and hexane); **<sup>1</sup>H NMR** (400 MHz,  $CDCl_3$ )  $\delta$  2.39 (s, 3H), 6.91 (d,  $J$  = 7.6 Hz, 1H), 7.10-7.13 (m, 1H), 7.20 (t,  $J$  = 7.4 Hz, 2H), 7.32-7.43 (comp, 5H), 7.50-7.56 (comp, 2H), 7.79 (d,  $J$  = 7.6 Hz, 1H); **<sup>13</sup>C NMR** (100 MHz,  $CDCl_3$ )  $\delta$  20.1, 122.3 (x 2), 126.0, 127.9, 128.1, 128.6, 128.7, 129.3, 130.2, 130.9, 131.5, 133.1, 133.3, 137.3, 139.5, 139.8, 141.3; **HRMS** (ESI, m/z) calcd for  $C_{20}H_{15}NO_2S$   $[M+H]^+$  334.0902, found 334.0886.

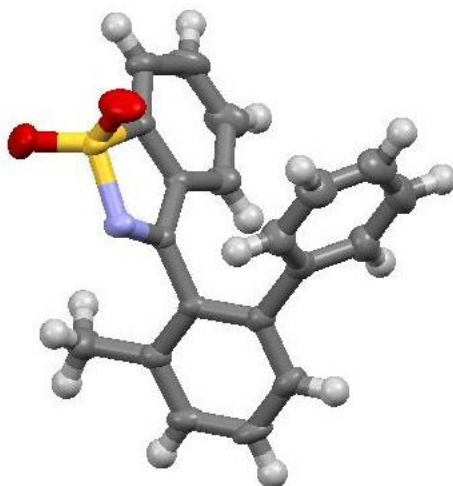

**Figure S1.** X-ray crystal structure of **3ca** (ellipsoid contour at 50% probability level)

|                                             |                                                               |
|---------------------------------------------|---------------------------------------------------------------|
| Empirical formula                           | C <sub>20</sub> H <sub>15</sub> NO <sub>2</sub> S             |
| Formula weight                              | 333.39                                                        |
| Temperature/K                               | 273.15                                                        |
| Crystal system                              | Monoclinic                                                    |
| Space group                                 | P2 <sub>1</sub> /c                                            |
| a/Å                                         | 7.4364(5)                                                     |
| b/Å                                         | 26.4068(16)                                                   |
| c/Å                                         | 8.4485(5)                                                     |
| α/°                                         | 90                                                            |
| β/°                                         | 94.973(2)                                                     |
| γ/°                                         | 90                                                            |
| Volume/Å <sup>3</sup>                       | 1652.80(18)                                                   |
| Z                                           | 4                                                             |
| ρ <sub>calc</sub> /cm <sup>3</sup>          | 1.340                                                         |
| μ/mm <sup>-1</sup>                          | 0.207                                                         |
| F(000)                                      | 696.0                                                         |
| Crystal size/mm <sup>3</sup>                | 0.74 × 0.52 × 0.41                                            |
| Radiation                                   | MoKα (λ = 0.71073)                                            |
| 2θ range for data collection/°              | 5.08 to 49.998                                                |
| Index ranges                                | -8 ≤ h ≤ 8, -31 ≤ k ≤ 31, -10 ≤ l ≤ 10                        |
| Reflections collected                       | 19836                                                         |
| Independent reflections                     | 2892 [R <sub>int</sub> = 0.0318, R <sub>sigma</sub> = 0.0167] |
| Data/restraints/parameters                  | 2892/0/218                                                    |
| Goodness-of-fit on F <sup>2</sup>           | 1.086                                                         |
| Final R indexes [I ≥ 2σ (I)]                | R <sub>1</sub> = 0.0461, wR <sub>2</sub> = 0.1078             |
| Final R indexes [all data]                  | R <sub>1</sub> = 0.0477, wR <sub>2</sub> = 0.1089             |
| Largest diff. peak/hole / e Å <sup>-3</sup> | 0.36/-0.50                                                    |

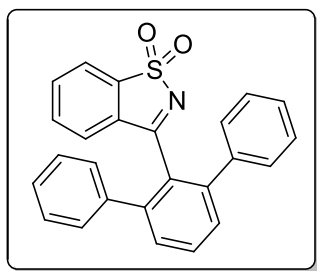

**3-([1,1':3',1''-terphenyl]-2'-yl)benzo[d]isothiazole 1,1-dioxide (3da):**

**Yield** 80% (63 mg); colourless solid; **R<sub>f</sub>** 0.5 (petroleum ether/ethyl acetate = 7:3); **eluent composition** petroleum ether/ethyl acetate = 7:3; **mp** 180-182 °C; **<sup>1</sup>H NMR** (600 MHz, CDCl<sub>3</sub>) δ 7.00 (d, *J* = 7.8 Hz, 1H), 7.19-7.22 (comp, 2H), 7.24 (app d, *J* = 7.8 Hz, 3H), 7.26-7.28 (comp, 5H), 7.35 (t, *J* = 7.5 Hz, 1H), 7.47 (t, *J* = 7.5 Hz, 1H), 7.58 (d, *J* = 7.8 Hz, 2H), 7.69-7.73 (comp, 2H); **<sup>13</sup>C NMR** (150 MHz, CDCl<sub>3</sub>) δ 122.3, 125.7, 128.1, 128.3, 128.6, 129.2, 129.7, 130.9, 132.2, 132.8, 133.2, 139.4, 139.5, 142.3, 173.6; **HRMS** (ESI, *m/z*) calcd for C<sub>25</sub>H<sub>17</sub>NO<sub>2</sub>S [M+H]<sup>+</sup> 396.1058; found 396.1057.

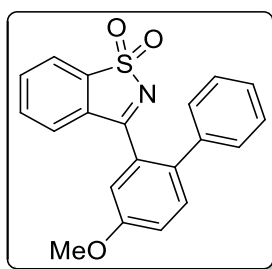

**3-(4-methoxy-[1,1'-biphenyl]-2-yl)benzo[d]isothiazole 1,1-dioxide (3ea):**

**Combined Yield** 77% (55 mg); **mono:bis** 7:1; colourless solid; **R<sub>f</sub>** 0.6 (petroleum ether/ethyl acetate = 7:3); **eluent composition** petroleum ether/ethyl acetate = 7:3; **<sup>1</sup>H NMR** (400 MHz, CDCl<sub>3</sub>) δ 3.94 (s, 3H), 6.95 (d, *J* = 8.0 Hz, 1H), 7.13-7.17 (m, 1H), 7.23 (d, *J* = 7.6 Hz, 2H), 7.28-7.30 (comp, 2H), 7.32-7.36 (comp, 3H), 7.52 (t, *J* = 7.6 Hz, 1H), 7.60 (d, *J* = 8.0 Hz, 1H), 7.82 (d, *J* = 7.6 Hz, 1H); **<sup>13</sup>C NMR** (100 MHz, CDCl<sub>3</sub>) δ 55.9, 114.3, 119.0, 122.3, 126.6, 127.9, 128.9, 129.2, 130.7, 130.9, 131.9, 132.9, 133.0, 133.9, 139.5, 139.7, 159.4, 174.3; **HRMS**(ESI, *m/z*) calcd for C<sub>20</sub>H<sub>15</sub>NO<sub>3</sub>S [M+H]<sup>+</sup> 350.0851, found 350.0852.

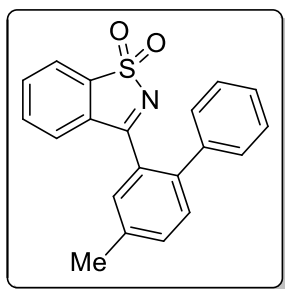

**3-(4-methyl-[1,1'-biphenyl]-2-yl)benzo[d]isothiazole 1,1-dioxide (3fa):**

**Yield** 87% (58 mg); colourless solid; **R<sub>f</sub>** 0.5 (petroleum ether/ethyl acetate = 7:3); **eluent composition** petroleum ether/ethyl acetate = 7:3; **mp** 110-112 °C; **<sup>1</sup>H NMR** (400 MHz, CDCl<sub>3</sub>) δ 2.48 (s, 3H), 6.90 (d, *J* = 8.0 Hz, 1H), 7.12-7.17 (m, 1H), 7.23 (t, *J* = 7.6 Hz, 2H), 7.27 (td, *J* = 7.6 Hz, 0.8 Hz, 1H), 7.34-7.36 (comp, 2H), 7.49 (td, *J* = 7.9 Hz, 0.7 Hz, 1H), 7.52-7.56 (comp, 3H), 7.80 (d, *J* = 7.6 Hz, 1H); **<sup>13</sup>C NMR** (100 MHz, CDCl<sub>3</sub>) δ 21.1, 122.3, 126.6, 128.1, 129.0, 129.2, 129.7, 130.5, 130.6, 131.1, 132.8, 133.0, 133.1, 138.3, 138.7, 139.7, 139.8, 174.6; **HRMS** (ESI, *m/z*) calcd for C<sub>20</sub>H<sub>15</sub>NO<sub>2</sub>S [M+Na]<sup>+</sup> 356.0721, found 356.0720.

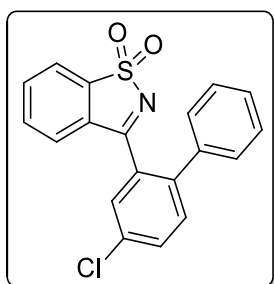

**3-(4-chloro-[1,1'-biphenyl]-2-yl)benzo[d]isothiazole 1,1-dioxide (3ga):**

**Yield** 73% (52 mg); colourless solid; **R<sub>f</sub>** 0.4 (petroleum ether/ethyl acetate = 7:3); **eluent composition** petroleum ether/ethyl acetate = 7:3; **mp** 120-122 °C; **<sup>1</sup>H NMR** (400 MHz, CDCl<sub>3</sub>) δ 6.89 (d, *J* = 7.6 Hz, 1H), 7.18 (app t, *J* = 7.2 Hz, 1H), 7.23 (app s, 1H), 7.25 (app s, 1H), 7.29-7.34 (comp, 3H), 7.52 (app t, *J* = 7.4 Hz, 1H), 7.60 (d, *J* = 8.0 Hz, 1H), 7.68 (dd, *J* = 8.4 Hz, 2.0 Hz, 1H), 7.73 (m, 1H), 7.81 (d, *J* = 7.2 Hz, 1H); **<sup>13</sup>C NMR** (100 MHz, CDCl<sub>3</sub>) δ 122.5, 126.3, 128.7, 129.1, 129.9, 130.5, 131.2, 131.9, 132.3, 133.2, 134.4, 136.7, 138.6, 138.6, 139.7, 140.0, 173.0; **HRMS** (ESI, *m/z*) calcd for C<sub>19</sub>H<sub>12</sub>ClNO<sub>2</sub>S [M+H]<sup>+</sup> 354.0356; found 354.0346.

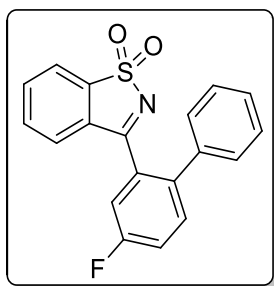

### 3-(4-fluoro-[1,1'-biphenyl]-2-yl)benzo[d]isothiazole 1,1-dioxide (3ha):

**Combined Yield** 73% (50 mg); **mono:bis** 14:1; colourless solid; **R<sub>f</sub>** 0.4 (petroleum ether/ethyl acetate = 7:3); **eluent composition** petroleum ether/ethyl acetate = 7:3; **<sup>1</sup>H NMR** (600 MHz, CDCl<sub>3</sub>) δ 6.99 (d, *J* = 7.8 Hz, 1H), 7.18 (app t, *J* = 7.5 Hz, 1H), 7.25 (app t, *J* = 7.5 Hz, 2H), 7.34 (dd, *J* = 7.2 Hz, 0.9 Hz, 1H), 7.36 (app s, 1H), 7.37 (app s, 1H), 7.45 (td, *J* = 8.1 Hz, 1.2 Hz, 1H), 7.51-7.56 (comp, 3H), 7.79 (d, *J* = 7.2 Hz, 1H); **<sup>13</sup>C NMR** (150 MHz, CDCl<sub>3</sub>) δ 119.6 (d, <sup>2</sup>*J*<sub>F-C</sub> = 23.1 Hz), 122.4, 125.6 (d, <sup>4</sup>*J*<sub>F-C</sub> = 3.6 Hz), 126.3, 128.7, 128.9, 129.0 (d, <sup>3</sup>*J*<sub>F-C</sub> = 6.75 Hz), 129.2 (d, <sup>3</sup>*J*<sub>F-C</sub> = 6.6 Hz), 130.0, 130.0, 130.5, 130.5 (d, <sup>2</sup>*J*<sub>F-C</sub> = 20.8 Hz), 132.6, 133.1, 133.1, 139.6, 159.7 (d, <sup>1</sup>*J*<sub>F-C</sub> = 247.9 Hz), 172.9 (d, *J* = 3.0 Hz); **HRMS** (ESI, *m/z*) calcd for C<sub>19</sub>H<sub>12</sub>FNO<sub>2</sub>S [M+H]<sup>+</sup> 338.0651, found 338.0650.

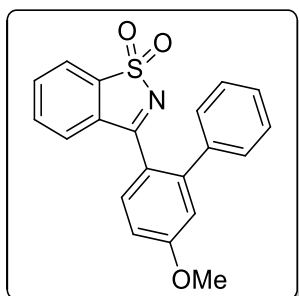

### 3-(5-methoxy-[1,1'-biphenyl]-2-yl)benzo[d]isothiazole 1,1-dioxide (3ia):

**Yield** 70% (49 mg); colourless solid; **R<sub>f</sub>** 0.6 (petroleum ether/ethyl acetate = 7:3); **eluent composition** petroleum ether/ethyl acetate = 7:3; **mp** 88-90 °C; **<sup>1</sup>H NMR** (400 MHz, CDCl<sub>3</sub>) δ 3.99 (s, 3H), 6.96 (d, *J* = 7.6 Hz, 1H), 7.11 (dd, *J* = 8.6 Hz, 2.6 Hz, 1H), 7.18 (d, *J* = 2.4 Hz, 1H), 7.22 (d, *J* = 7.2 Hz, 1H), 7.28 (s, 1H), 7.29-7.32 (comp, 2H), 7.40 (d, *J* = 7.2 Hz, 2H), 7.51 (t, *J* = 7.6 Hz, 1H), 7.76 (d, *J* = 8.4 Hz, 1H), 7.82 (d, *J* = 7.6 Hz, 1H); **<sup>13</sup>C NMR** (100 MHz, CDCl<sub>3</sub>) δ 55.9, 113.6, 116.3, 122.2 (x 2), 122.4, 126.6, 128.5, 129.0, 129.2, 131.4, 132.4, 132.6, 132.8, 139.9, 143.7, 162.8, 173.8; **HRMS** (ESI, *m/z*) calcd for C<sub>20</sub>H<sub>15</sub>NO<sub>3</sub>S [M+H]<sup>+</sup> 350.0851, found 350.0840.

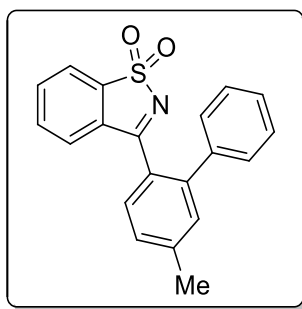

### 3-(5-methyl-[1,1'-biphenyl]-2-yl)benzo[d]isothiazole 1,1-dioxide (3ja):

**Combined Yield** 88% (59 mg); **mono:bis** 12:1; colourless solid; **R<sub>f</sub>** 0.5 (petroleum ether/ethyl acetate = 7:3); **eluent composition** petroleum ether/ethyl acetate = 7:3; **<sup>1</sup>H NMR** (400 MHz, CDCl<sub>3</sub>) δ 2.56 (s, 3H), 6.95 (d, *J* = 7.6 Hz, 1H), 7.16-7.20 (m, 1H), 7.24 (app s, 1H), 7.28 (m, 1H), 7.31 (dd, *J* = 7.6 Hz, 0.8 Hz, 1H), 7.37 (app s, 1H), 7.39 (app s, 1H), 7.41-7.42 (m, 1H), 7.49 (app s, 1H), 7.52 (d, *J* = 7.6 Hz, 1H), 7.67 (d, *J* = 7.6 Hz, 1H), 7.81 (d, *J* = 6.8 Hz, 1H); **<sup>13</sup>C NMR** (100 MHz, CDCl<sub>3</sub>) δ 21.8, 122.2, 126.6, 127.1, 128.3, 128.9, 128.9, 129.2, 130.3, 131.2, 131.4, 132.7, 132.9, 139.8, 139.9, 141.6, 142.9, 174.3; **HRMS** (ESI, *m/z*) calcd for C<sub>20</sub>H<sub>15</sub>NO<sub>2</sub>S [M+H]<sup>+</sup> 334.0902, found 334.0904.

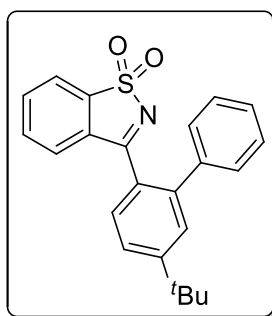

### 3-(5-(tert-butyl)-4'-methoxy-[1,1'-biphenyl]-2-yl)benzo[d] isothiazole 1,1-dioxide (3ka):

**Combined Yield** 66% (50 mg); **mono:bis** 32:1; colourless solid; **R<sub>f</sub>** 0.6 (petroleum ether/ethyl acetate = 7:3); **eluent composition** petroleum ether/ethyl acetate = 7:3; **mp** 160-162 °C; **<sup>1</sup>H NMR** (400 MHz, CDCl<sub>3</sub>) δ 1.44 (s, 9H), 6.97 (d, *J* = 8.0 Hz, 1H), 7.14-7.19 (m, 1H), 7.24 (d, *J* = 8.0 Hz, 1H), 7.26-7.27 (m, 1H), 7.28 (app t, *J* = 7.2 Hz, 1H), 7.36-7.39 (comp, 2H), 7.49 (td, *J* = 7.4 Hz, 0.8 Hz, 1H), 7.59 (dd, *J* = 8.2 Hz, 1.8 Hz, 1H), 7.65 (d, *J* = 2.0 Hz, 1H), 7.69 (d, *J* = 8.4 Hz, 1H), 7.80 (d, *J* = 7.6 Hz, 1H); **<sup>13</sup>C NMR** (100 MHz, CDCl<sub>3</sub>) δ 31.4, 35.4, 122.2, 125.3, 126.7, 127.1, 127.8, 128.2, 128.9, 129.3, 130.1, 131.2, 132.8, 132.9, 139.8, 140.4, 141.4, 156.1, 174.3; **HRMS** (ESI, *m/z*) calcd for C<sub>23</sub>H<sub>21</sub>NO<sub>2</sub>S [M+H]<sup>+</sup> 376.1371, found 376.1373.

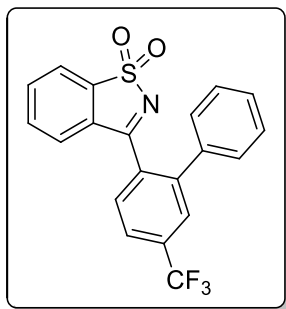

### 3-(5-(trifluoromethyl)-[1,1'-biphenyl]-2-yl)benzo[d]isothiazole 1,1-dioxide (3la):

**Combined Yield** 74% (58 mg); **mono:bis** 6:1; colourless solid; **R<sub>f</sub>** 0.3 (petroleum ether/ethyl acetate = 7:3); **eluent composition** petroleum ether/ethyl acetate = 7:3; **<sup>1</sup>H NMR** (600 MHz, CDCl<sub>3</sub>) δ 6.90 (d, *J* = 7.8 Hz, 1H), 7.22 (app t, *J* = 7.5 Hz, 1H), 7.27-7.30 (comp, 2H), 7.33 (app t, *J* = 7.8 Hz, 1H), 7.38-7.40 (comp, 2H), 7.54 (app t, *J* = 7.5 Hz, 1H), 7.82-7.84 (comp, 2H), 7.86 (d, *J* = 7.8 Hz, 1H), 7.92 (app s, 1H); **<sup>13</sup>C NMR** (150 MHz, CDCl<sub>3</sub>) δ 122.6, 124.9 (q, *J* = 3.5 Hz), 126.1, 127.4 (q, *J* = 3.5 Hz), 128.8, 128.9, 129.2, 129.3, 130.4, 130.7, 133.2, 133.3, 133.3, 134.1 (q, *J* = 32.8 Hz), 139.0 (q, *J* = 207.5 Hz), 142.4, 173.1; **HRMS** (ESI, *m/z*) calcd for C<sub>20</sub>H<sub>12</sub>F<sub>3</sub>NO<sub>2</sub>S [M+H]<sup>+</sup> 388.0619, found 388.0618.

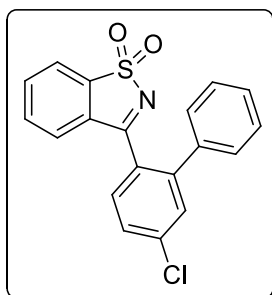

### 3-(5-chloro-[1,1'-biphenyl]-2-yl)benzo[d]isothiazole 1,1-dioxide (3ma):

**Combined Yield** 73% (54 mg); **mono:bis** 3:1; colourless solid; **R<sub>f</sub>** 0.4 (petroleum ether/ethyl acetate = 7:3); **eluent composition** petroleum ether/ethyl acetate = 7:3; **mp** 98-100 °C; **<sup>1</sup>H NMR** (600 MHz, CDCl<sub>3</sub>) δ 6.89 (d, *J* = 7.8 Hz, 1H), 7.19-7.22 (m, 1H), 7.25-7.27 (comp, 2H), 7.30 (td, *J* = 7.5 Hz, 0.8 Hz, 1H), 7.35-7.36 (comp, 2H), 7.52 (td, *J* = 7.5 Hz, 0.8 Hz, 1H), 7.56 (dd, *J* = 8.1 Hz, 2.1 Hz, 1H), 7.66 (d, *J* = 1.8 Hz, 1H), 7.69 (d, *J* = 7.8 Hz, 1H), 7.81 (d, *J* = 7.8 Hz, 1H); **<sup>13</sup>C NMR** (150 MHz, CDCl<sub>3</sub>) δ 122.5, 126.3, 128.3, 128.4, 129.0, 129.1, 129.2, 130.7, 130.7, 131.6, 133.1, 133.1, 138.5, 138.5, 139.7, 143.2, 173.3; **HRMS** (ESI, *m/z*) calcd for C<sub>19</sub>H<sub>12</sub>ClNO<sub>2</sub>S [M+H]<sup>+</sup> 354.0356, found 354.0358.

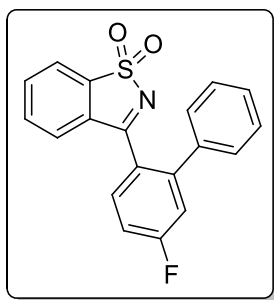

### 3-(5-fluoro-[1,1'-biphenyl]-2-yl)benzo[d]isothiazole 1,1-dioxide (3na):

**Combined Yield** 72% (50 mg); **mono:bis** 13:1; colourless solid; **R<sub>f</sub>** 0.4 (petroleum ether/ethyl acetate = 7:3); **eluent composition** petroleum ether/ethyl acetate = 7:3; **<sup>1</sup>H NMR** (400 MHz, CDCl<sub>3</sub>) δ 6.90 (d, *J* = 8.0 Hz, 1H), 7.18-7.22 (m, 1H), 7.24 (app s, 1H), 7.26-7.29 (comp, 2H), 7.30 (app t, *J* = 7.6 Hz, 1H), 7.34-7.38 (comp, 3H), 7.51 (app t, *J* = 7.6 Hz, 1H), 7.75 (dd, *J* = 8.4 Hz, 5.6 Hz, 1H), 7.80 (d, *J* = 7.6 Hz, 1H); **<sup>13</sup>C NMR** (150 MHz, CDCl<sub>3</sub>) δ 115.4 (d, <sup>2</sup>*J*<sub>F-C</sub> = 21.7 Hz), 117.6 (d, <sup>2</sup>*J*<sub>F-C</sub> = 22.2 Hz), 122.4, 125.9, 126.3, 129.0, 129.0, 129.1, 130.8, 132.6 (d, <sup>3</sup>*J*<sub>F-C</sub> = 9.1 Hz), 133.0, 133.1, 138.6 (d, <sup>4</sup>*J*<sub>F-C</sub> = 1.5 Hz), 139.7, 144.3 (d, <sup>3</sup>*J*<sub>F-C</sub> = 8.5 Hz), 164.8 (d, <sup>1</sup>*J*<sub>F-C</sub> = 252.3 Hz), 173.3; **HRMS** (ESI, *m/z*) calcd for C<sub>19</sub>H<sub>12</sub>FNO<sub>2</sub>S [M+H]<sup>+</sup> 338.0651, found 338.0635.

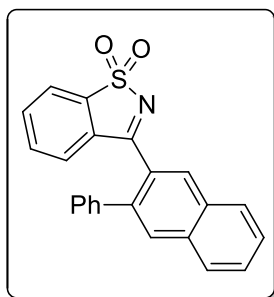

### 3-(3-phenylnaphthalen-2-yl)benzo[d]isothiazole 1,1-dioxide (3oa):

**Yield** 84% (62 mg); colourless solid; **R<sub>f</sub>** 0.6 (petroleum ether/ethyl acetate = 7:3); **eluent composition** petroleum ether/ethyl acetate = 7:3; **mp** 122-124 °C; **<sup>1</sup>H NMR** (400 MHz, CDCl<sub>3</sub>) δ 6.98 (d, *J* = 7.6 Hz, 1H), 7.19 (app t, *J* = 7.4 Hz, 1H), 7.28-7.33 (comp, 3H), 7.47 (d, *J* = 7.6 Hz, 2H), 7.51 (app t, *J* = 7.6 Hz, 1H), 7.61 (td, *J* = 7.5 Hz, 0.9 Hz, 1H), 7.68 (td, *J* = 7.5 Hz, 0.9 Hz, 1H), 7.82 (d, *J* = 7.6 Hz, 1H), 7.99 (d, *J* = 8.4 Hz, 2H), 8.10 (s, 1H), 8.30 (s, 1H); **<sup>13</sup>C NMR** (100 MHz, CDCl<sub>3</sub>) δ 122.3, 126.7, 127.5, 128.2, 128.2 (x 2), 128.8, 128.9, 129.0, 129.3, 129.9, 131.0, 131.3, 132.0, 132.9, 133.1, 134.9, 137.6, 139.7, 139.9, 174.2; **HRMS** (ESI, *m/z*) calcd for C<sub>23</sub>H<sub>15</sub>NO<sub>2</sub>S [M+H]<sup>+</sup> 370.0902, found 370.0893.

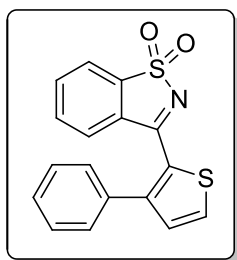

### 3-(3-phenylthiophen-2-yl)benzo[d]isothiazole 1,1-dioxide (3pa):

**Yield** 80% (52 mg); colourless solid; **R<sub>f</sub>** 0.5 (petroleum ether/ethyl acetate = 7:3); **eluent composition** petroleum ether/ethyl acetate = 7:3; **mp** 114-116 °C; **<sup>1</sup>H NMR** (400 MHz, CDCl<sub>3</sub>) δ 6.93 (d, *J* = 8.0 Hz, 1H), 7.23 (td, *J* = 7.8 Hz, 0.8 Hz, 1H), 7.28-7.31 (comp, 3H), 7.35-7.38 (comp, 2H), 7.39 (d, *J* = 5.2 Hz, 1H), 7.54 (td, *J* = 7.6 Hz, 0.8 Hz, 1H), 7.76 (d, *J* = 5.2 Hz, 1H), 7.86 (d, *J* = 7.2 Hz, 1H); **<sup>13</sup>C NMR** (100 MHz, CDCl<sub>3</sub>) δ 122.5, 127.4, 127.7, 129.0, 129.2, 129.4, 130.2, 131.3, 132.3, 132.9, 133.0, 135.5, 140.7, 147.8, 166.6; **HRMS** (ESI, *m/z*) calcd for C<sub>17</sub>H<sub>11</sub>NO<sub>2</sub>S<sub>2</sub> [M+H]<sup>+</sup> 326.0310, found 326.0309.

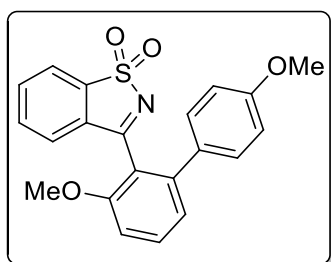

### 3-(3,4'-dimethoxy-[1,1'-biphenyl]-2-yl)benzo[d]isothiazole 1,1-dioxide (3bb):

**Yield** 70% (53 mg); colourless solid; **R<sub>f</sub>** 0.6 (petroleum ether/ethyl acetate = 7:3); **eluent composition** petroleum ether/ethyl acetate = 7:3; **mp** 120-122 °C; **<sup>1</sup>H NMR** (400 MHz, CDCl<sub>3</sub>) δ 3.70 (s, 3H), 3.80 (s, 3H), 6.74-6.77 (comp, 2H), 7.03 (d, *J* = 8.0 Hz, 1H), 7.10 (d, *J* = 7.6 Hz, 1H), 7.13 (dd, *J* = 8.0 Hz, 0.4 Hz, 1H), 7.18-7.22 (comp, 2H), 7.46 (td, *J* = 7.6, 0.8 Hz, 1H), 7.55 (d, *J* = 8.0 Hz, 1H), 7.58-7.60 (m, 1H), 7.83 (d, *J* = 7.6 Hz, 1H); **<sup>13</sup>C NMR** (100 MHz, CDCl<sub>3</sub>) δ 55.4, 56.3, 110.0, 114.1, 118.3, 122.3, 122.8, 125.9, 130.4, 131.5, 132.2, 132.5, 132.9, 133.5, 139.5, 142.9, 157.8, 159.5, 172.1; **HRMS** (ESI, *m/z*) calcd for C<sub>21</sub>H<sub>17</sub>NO<sub>4</sub>S [M+H]<sup>+</sup> 380.0957, found 380.0959.

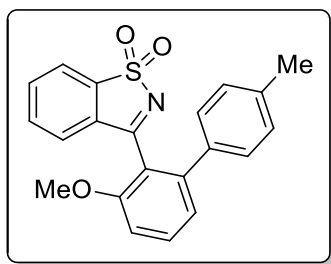

### 3-(3-methoxy-4'-methyl-[1,1'-biphenyl]-2-yl)benzo[d]isothiazole 1,1-dioxide (3bc):

**Yield** 84% (61 mg); colourless solid; **R<sub>f</sub>** 0.6 (petroleum ether/ethyl acetate = 7:3); **eluent composition** petroleum ether/ethyl acetate = 7:3; **mp** 162-164 °C; **<sup>1</sup>H NMR** (400 MHz, CDCl<sub>3</sub>) δ 2.24 (s, 3H), 3.80 (s, 3H), 7.02-7.06 (comp, 3H), 7.14-7.16 (comp, 4H), 7.48 (app t, *J* = 7.6 Hz, 1H), 7.55-7.60 (comp, 2H), 7.83 (d, *J* = 7.6 Hz, 1H); **<sup>13</sup>C NMR** (100 MHz, CDCl<sub>3</sub>) δ 21.2, 56.3, 110.1, 118.3, 122.3, 122.9, 125.9, 129.0, 129.4, 132.2, 132.5, 132.9, 133.5, 136.2, 137.9, 139.5, 143.3, 157.8, 172.1; **HRMS** (ESI, *m/z*) calcd for C<sub>21</sub>H<sub>17</sub>NO<sub>3</sub>S [M+H]<sup>+</sup> 364.1007, found 364.0997.

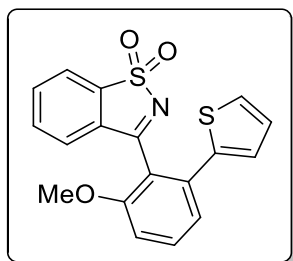

### 3-(2-methoxy-6-(thiophen-2-yl)phenyl)benzo[d]isothiazole 1,1-dioxide (3bd):

**Yield** 76% (54 mg); colourless solid; **R<sub>f</sub>** 0.4 (petroleum ether/ethyl acetate = 7:3); **eluent composition** petroleum ether/ethyl acetate = 7:3; **mp** 88-90 °C; **<sup>1</sup>H NMR** (400 MHz, CDCl<sub>3</sub>) δ 3.78 (s, 3H), 6.84 (dd, *J* = 4.8 Hz, 3.6 Hz, 1H), 6.96 (dd, *J* = 3.6 Hz, 0.8 Hz, 1H), 7.03 (d, *J* = 8.4 Hz, 1H), 7.11 (d, *J* = 7.6 Hz, 1H), 7.17 (dd, *J* = 5.0 Hz, 0.6 Hz, 1H), 7.24-7.25 (m, 1H), 7.48 (app t, *J* = 7.6 Hz, 1H), 7.54 (app t, *J* = 8.0 Hz, 1H), 7.60 (app t, *J* = 7.4 Hz, 1H), 7.85 (d, *J* = 7.6 Hz, 1H); **<sup>13</sup>C NMR** (100 MHz, CDCl<sub>3</sub>) δ 56.4, 110.8, 118.1, 122.4, 122.8, 125.4, 127.0, 128.0, 128.2, 132.3, 132.3, 133.1, 133.7, 135.4, 139.4, 140.2, 157.9, 171.8; **HRMS** (ESI, *m/z*) calcd for C<sub>18</sub>H<sub>13</sub>NO<sub>3</sub>S<sub>2</sub> [M+H]<sup>+</sup> 356.0415, found 356.0406.

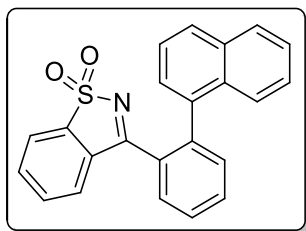

### 3-(2-(naphthalen-1-yl)phenyl)benzo[d]isothiazole 1,1-dioxide (3be):

**Yield** 65% (48 mg); colourless solid; **R<sub>f</sub>** 0.4 (petroleum ether/ethyl acetate = 7:3); **eluent composition** petroleum ether/ethyl acetate = 7:3; **mp** 152-154 °C; **<sup>1</sup>H NMR** (400 MHz, CDCl<sub>3</sub>) δ 7.00-7.06 (comp, 2H), 7.31 (app t, *J* = 7.4 Hz, 1H), 7.34-7.39 (comp, 2H), 7.44-7.50 (comp, 2H), 7.63-7.68 (comp, 3H), 7.73-7.79 (comp, 3H), 7.82 (d, *J* = 7.6 Hz, 1H), 7.94 (d, *J* = 7.6 Hz, 1H); **<sup>13</sup>C NMR** (100 MHz, CDCl<sub>3</sub>) δ 122.2, 125.2, 125.4, 125.6, 126.2, 127.0, 128.3, 128.7, 129.0, 129.1, 130.0, 130.8, 131.4, 131.4, 131.6, 132.4, 132.6, 132.9, 133.8, 136.8, 139.4, 139.9, 173.7; **HRMS** (ESI, *m/z*) calcd for C<sub>23</sub>H<sub>15</sub>NO<sub>2</sub>S [M+H]<sup>+</sup> 370.0902, found 370.0888.

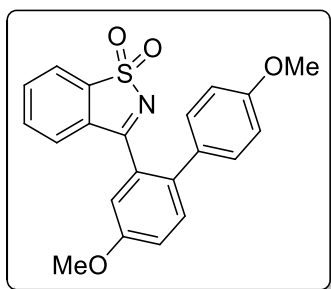

### 3-(4,4'-dimethoxy-[1,1'-biphenyl]-2-yl)benzo[d]isothiazole 1,1-dioxide (3db):

**Yield** 65% (49 mg); colourless solid; **R<sub>f</sub>** 0.7 (petroleum ether/ethyl acetate = 7:3); **eluent composition** petroleum ether/ethyl acetate = 7:3; **mp** 140-142 °C; **<sup>1</sup>H NMR** (400 MHz, CDCl<sub>3</sub>) δ 3.68 (s, 3H), 3.90 (s, 3H), 6.73-6.76 (comp, 2H), 6.91 (d, *J* = 7.6 Hz, 1H), 7.20-7.25 (comp, 4H), 7.30 (d, *J* = 7.6 Hz, 1H), 7.49 (dd, *J* = 7.6 Hz, 0.4 Hz, 1H), 7.53 (d, *J* = 8.4 Hz, 1H), 7.81 (d, *J* = 7.6 Hz, 1H); **<sup>13</sup>C NMR** (100 MHz, CDCl<sub>3</sub>) δ 55.4, 55.9, 114.1, 114.4, 119.2, 122.3, 126.7, 130.3, 130.5, 131.0, 131.8, 132.0, 132.9, 133.1, 133.7, 139.7, 159.1, 159.5, 174.5; **HRMS** (ESI, *m/z*) calcd for C<sub>21</sub>H<sub>17</sub>NO<sub>4</sub>S [M+H]<sup>+</sup> 380.0957, found 380.0946.

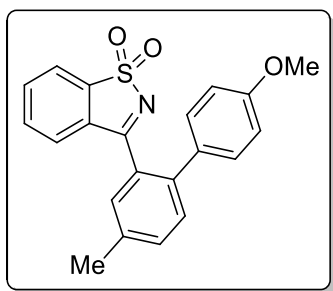

### 3-(4'-methoxy-4-methyl-[1,1'-biphenyl]-2-yl)benzo[d]isothiazole 1,1-dioxide (3eb):

**Yield** 86% (63 mg); colourless solid; **R<sub>f</sub>** 0.6 (petroleum ether/ethyl acetate = 7:3); **eluent composition** petroleum ether/ethyl acetate = 7:3; **mp** 126-128 °C; **<sup>1</sup>H NMR** (400 MHz, CDCl<sub>3</sub>) δ 2.46 (s, 3H), 3.68, (s, 3H), 6.74-6.77 (comp, 2H), 6.89 (d, *J* = 8.0 Hz, 1H), 7.25-7.26 (m, 1H), 7.26-7.27 (m, 1H), 7.29 (dd, *J* = 7.6 Hz, 0.8 Hz, 1H), 7.47-7.51 (comp, 3H), 7.53 (m, 1H), 7.80 (dd, *J* = 7.6 Hz, 0.4 Hz, 1H); **<sup>13</sup>C NMR** (100 MHz, CDCl<sub>3</sub>) δ 21.1, 55.4, 114.4, 122.2, 126.7, 129.5, 130.3 (x 2), 130.5, 131.1, 132.2, 132.8, 133.1, 133.1, 137.8, 138.3, 139.7, 159.6, 174.8; **HRMS** (ESI, *m/z*) calcd for C<sub>21</sub>H<sub>17</sub>NO<sub>3</sub>S [M+H]<sup>+</sup> 364.1007, found 364.0995.

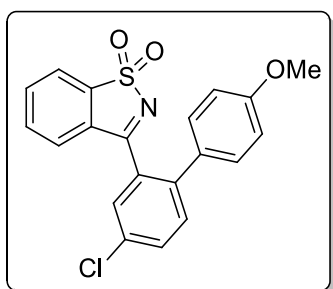

### 3-(4-chloro-4'-methoxy-[1,1'-biphenyl]-2-yl)benzo[d]isothiazole 1,1-dioxide (3fb):

**Combined Yield** 68% (54 mg); **mono:bis** 10:1; colourless solid; **R<sub>f</sub>** 0.5 (petroleum ether/ethyl acetate = 7:3); **eluent composition** petroleum ether/ethyl acetate = 7:3; **<sup>1</sup>H NMR** (400 MHz, CDCl<sub>3</sub>) δ 3.71 (s, 3H), 6.77-6.80 (comp, 2H), 6.89 (d, *J* = 7.6 Hz, 1H), 7.28 (d, *J* = 2.0 Hz, 1H), 7.33 (td, *J* = 8.0 Hz, 0.9 Hz, 1H), 7.53 (dd, *J* = 7.6 Hz, 0.8 Hz, 1H), 7.56-7.60 (comp, 2H), 7.66 (dd, *J* = 8.4 Hz, 2.4 Hz, 1H), 7.72 (d, *J* = 2.0 Hz, 1H), 7.83 (d, *J* = 7.6 Hz, 1H); **<sup>13</sup>C NMR** (100 MHz, CDCl<sub>3</sub>) δ 55.4, 114.6, 122.5, 126.4, 129.8, 130.3, 130.6, 130.9, 131.0, 131.7, 132.2, 133.1, 133.2, 133.9, 139.6, 139.7, 160.1, 173.2; **HRMS** (ESI, *m/z*) calcd for C<sub>20</sub>H<sub>14</sub>ClNO<sub>3</sub>S [M+H]<sup>+</sup> 384.0461, found 384.0448.

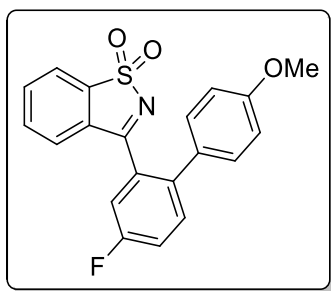

### 3-(4-fluoro-4'-methoxy-[1,1'-biphenyl]-2-yl)benzo[d]isothiazole 1,1-dioxide (3gb):

**Combined Yield** 82% (62 mg); **mono:bis** 9:1; colourless solid; **R<sub>f</sub>** 0.5 (petroleum ether/ethyl acetate = 7:3); **eluent composition** petroleum ether/ethyl acetate = 7:3; **<sup>1</sup>H NMR** (600 MHz, CDCl<sub>3</sub>) δ 3.69 (s, 3H), 6.78 (d, *J* = 9.0 Hz, 2H), 6.96 (d, *J* = 8.0 Hz, 1H), 7.30 (dd, *J* = 8.7 Hz, 1.5 Hz, 2H), 7.34 (td, *J* = 7.6 Hz, 0.8 Hz, 1H), 7.41-7.45 (m, 1H), 7.50-7.52 (comp, 2H), 7.53 (dd, *J* = 7.5 Hz, 0.9 Hz, 1H), 7.80 (d, *J* = 7.8 Hz, 1H); **<sup>13</sup>C NMR** (150 MHz, CDCl<sub>3</sub>) δ 55.4, 114.2, 119.5 (d, <sup>2</sup>*J*<sub>F-C</sub> = 23.2 Hz), 122.4, 124.8, 125.6 (d, <sup>3</sup>*J*<sub>F-C</sub> = 3.6 Hz), 126.4, 128.6 (d, <sup>2</sup>*J*<sub>F-C</sub> = 16.9 Hz), 129.5 (d, <sup>3</sup>*J*<sub>F-C</sub> = 8.7 Hz), 130.6, 131.7, 131.8, 132.4 (d, <sup>4</sup>*J*<sub>F-C</sub> = 3.1 Hz), 133.1, 133.2, 139.6, 159.8 (d, <sup>1</sup>*J*<sub>F-C</sub> = 247.0 Hz), 160.0, 173.2; **HRMS** (ESI, *m/z*) calcd for C<sub>20</sub>H<sub>15</sub>FO<sub>3</sub>S [M+H]<sup>+</sup> 368.0757, found 368.0756.

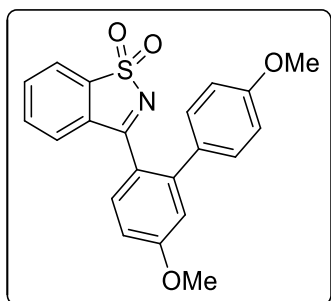

### 3-(4',5-dimethoxy-[1,1'-biphenyl]-2-yl)benzo[d]isothiazole 1,1-dioxide (3hb):

**Combined Yield** 83% (65 mg); **mono:bis** 8:1; colourless solid; **R<sub>f</sub>** 0.6 (petroleum ether/ethyl acetate = 7:3); **eluent composition** petroleum ether/ethyl acetate = 7:3; **<sup>1</sup>H NMR** (400 MHz, CDCl<sub>3</sub>) δ 3.69 (s, 3H), 3.94 (s, 3H), 6.75-6.79 (comp, 2H), 6.90 (d, *J* = 8.0 Hz, 1H), 7.03 (dd, *J* = 8.6 Hz, 2.6 Hz, 1H), 7.10 (d, *J* = 2.4 Hz, 1H), 7.26-7.30 (comp, 3H), 7.48 (td, *J* = 7.5 Hz, 0.7 Hz, 1H), 7.70 (d, *J* = 8.8 Hz, 1H), 7.79 (d, *J* = 7.6 Hz, 1H); **<sup>13</sup>C NMR** (100 MHz, CDCl<sub>3</sub>) δ 55.4, 55.8, 113.2, 114.1, 114.5, 115.9, 122.2, 122.3, 126.8, 130.4, 131.4, 132.4, 132.6, 132.9, 139.9, 143.4, 160.0, 162.8, 174.0; **HRMS** (ESI, *m/z*) calcd for C<sub>21</sub>H<sub>17</sub>NO<sub>4</sub>S [M+H]<sup>+</sup> 380.0957, found 380.0948.

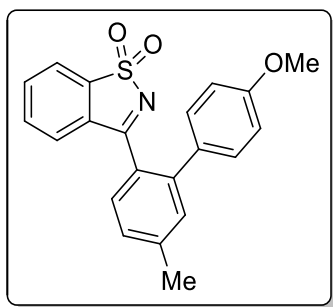

### 3-(4'-methoxy-5-methyl-[1,1'-biphenyl]-2-yl)benzo[d]isothiazole 1,1-dioxide (3ib):

**Combined Yield** 61% (46 mg); **mono:bis** 9:1; colourless solid; **R<sub>f</sub>** 0.7 (petroleum ether/ethyl acetate = 7:3); **eluent composition** petroleum ether/ethyl acetate = 7:3; **<sup>1</sup>H NMR** (600 MHz, CDCl<sub>3</sub>) δ 2.52 (s, 3H), 3.69 (s, 3H), 6.76 (d, *J* = 9.0 Hz, 2H), 6.90 (d, *J* = 7.8 Hz, 1H), 7.27-7.29 (comp, 3H), 7.33 (d, *J* = 7.8 Hz, 1H), 7.43 (app s, 1H), 7.49 (app t, *J* = 7.5, 1H), 7.62 (d, *J* = 7.8 Hz, 1H), 7.80 (d, *J* = 7.8 Hz, 1H); **<sup>13</sup>C NMR** (150 MHz, CDCl<sub>3</sub>) δ 21.8, 55.4, 114.4, 122.2, 126.7, 127.0, 128.4, 130.3, 130.4, 131.1, 131.3, 132.4, 132.7, 133.0, 139.8, 141.2, 142.9, 159.7, 174.6; **HRMS** (ESI, *m/z*) calcd for C<sub>21</sub>H<sub>17</sub>NO<sub>3</sub>S [M+H]<sup>+</sup> 364.1007, found 364.0993.

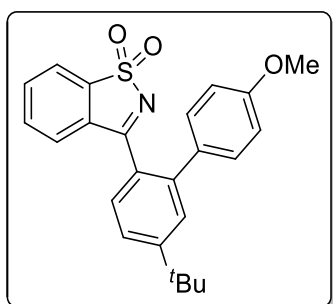

### 3-(5-(tert-butyl)-4'-methoxy-[1,1'-biphenyl]-2-yl)benzo[d]isothiazole 1,1-dioxide (3jb):

**Combined Yield** 60% (50 mg); **mono:bis** 8:1; colourless solid; **R<sub>f</sub>** 0.7 (petroleum ether/ethyl acetate = 7:3); **eluent composition** petroleum ether/ethyl acetate = 7:3; **<sup>1</sup>H NMR** (400 MHz, CDCl<sub>3</sub>) δ 1.40 (s, 9H), 3.68 (s, 3H), 6.74-6.78 (comp, 2H), 6.92 (d, *J* = 7.6 Hz, 1H), 7.24-7.25 (m, 1H), 7.26-7.28 (comp, 2H), 7.47 (td, *J* = 7.4 Hz, 0.7 Hz, 1H), 7.52 (dd, *J* = 8.2 Hz, 1.8 Hz, 1H), 7.58 (d, *J* = 2.0 Hz, 1H), 7.64 (d, *J* = 8.4 Hz, 1H), 7.78 (d, *J* = 7.6 Hz, 1H); **<sup>13</sup>C NMR** (100 MHz, CDCl<sub>3</sub>) δ 31.4, 35.4, 55.4, 114.4, 122.2, 124.9, 126.8, 127.0, 127.6, 130.1, 130.5, 131.3, 132.7, 132.9, 133.0, 139.8, 141.0, 156.0, 159.8, 174.6; **HRMS** (ESI, *m/z*) calcd for C<sub>24</sub>H<sub>23</sub>NO<sub>3</sub>S [M+H]<sup>+</sup> 406.1477, found 406.1468.

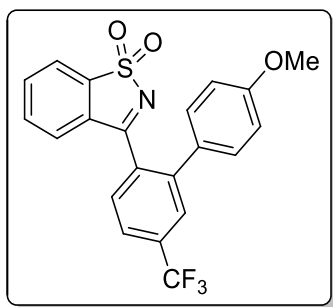

**3-(4'-methoxy-5-(trifluoromethyl)-[1,1'-biphenyl]-2-yl)benzo[d] isothiazole 1,1-dioxide (3kb):**

**Yield** 70% (58 mg); colourless solid; **R<sub>f</sub>** 0.5 (petroleum ether/ethyl acetate = 7:3); **eluent composition** petroleum ether/ethyl acetate = 7:3; **mp** 102-104 °C; **<sup>1</sup>H NMR** (400 MHz, CDCl<sub>3</sub>) δ 3.71(s, 3H), 6.78-6.82 (comp, 2H), 6.87 (d, *J* = 8.0 Hz, 1H), 7.30-7.32 (comp, 2H), 7.34 (dd, *J* = 7.6 Hz, 0.8 Hz, 1H), 7.55 (td, *J* = 7.4 Hz, 0.5 Hz, 1H), 7.78 (dd, *J* = 8.0 Hz, 1.2 Hz, 1H), 7.83-7.85 (comp, 2H), 7.87 (app s, 1H); **<sup>13</sup>C NMR** (100 MHz, CDCl<sub>3</sub>) δ 55.5, 114.8, 122.6, 124.3 (q, *J* = 3.6 Hz), 126.2, 127.2 (q, *J* = 3.6 Hz), 130.5, 130.7, 130.7, 132.9, 133.3, 133.4, 134.1 (q, *J* = 32.4 Hz), 139.7, 140.9 (q, *J* = 227.7 Hz), 142.0, 160.4, 173.4; **HRMS** (ESI, *m/z*) calcd for C<sub>21</sub>H<sub>14</sub>F<sub>3</sub>NO<sub>3</sub>S [M+H]<sup>+</sup> 418.0725, found 418.0714.

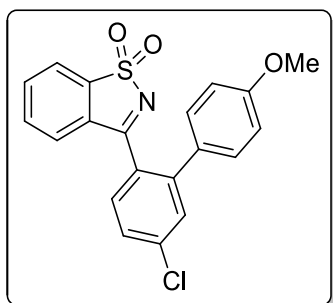

**3-(5-chloro-4'-methoxy-[1,1'-biphenyl]-2-yl)benzo[d]isothiazole 1,1-dioxide (3lb):**

**Yield** 70% (54 mg); colourless solid; **R<sub>f</sub>** 0.5 (petroleum ether/ethyl acetate = 7:3); **eluent composition** petroleum ether/ethyl acetate = 7:3; **mp** 136-138 °C; **<sup>1</sup>H NMR** (400 MHz, CDCl<sub>3</sub>) δ 3.68 (s, 3H), 6.73-6.77 (comp, 2H), 6.84 (d, *J* = 7.6 Hz, 1H), 7.23-7.25 (comp, 2H), 7.29 (dd, *J* = 7.6 Hz, 0.8 Hz, 1H), 7.46-7.52 (comp, 2H), 7.59 (d, *J* = 2.0 Hz, 1H), 7.64 (d, *J* = 8.4 Hz, 1H), 7.79 (d, *J* = 7.6 Hz, 1H); **<sup>13</sup>C NMR** (100 MHz, CDCl<sub>3</sub>) δ 55.5, 114.6, 122.4, 126.4, 127.9, 128.1, 130.4 (x 2), 130.8, 130.9, 131.6, 133.0, 133.2, 138.4, 139.8, 142.9, 160.2, 173.6; **HRMS** (ESI, *m/z*) calcd for C<sub>20</sub>H<sub>14</sub>ClNO<sub>3</sub>S [M+H]<sup>+</sup> 384.0461, found 384.0448.

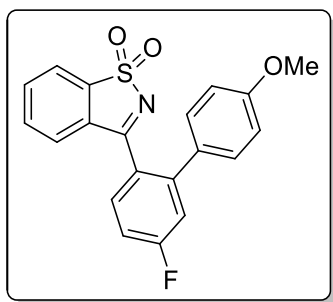

### 3-(5-fluoro-4'-methoxy-[1,1'-biphenyl]-2-yl)benzo[d]isothiazole 1,1-dioxide (3mb):

**Yield** 68% (50 mg); colourless solid; **R<sub>f</sub>** 0.5 (petroleum ether/ethyl acetate = 7:3); **eluent composition** petroleum ether/ethyl acetate = 7:3; **mp** 120-122 °C; **<sup>1</sup>H NMR** (400 MHz, CDCl<sub>3</sub>) δ 3.67 (s, 3H), 6.73-6.77 (comp, 2H), 6.85 (d, *J* = 8.0 Hz, 1H), 7.20 (td, *J* = 8.2 Hz, 2.7 Hz, 1H), 7.24-7.26 (comp, 2H), 7.28-7.31 (comp, 2H), 7.49 (td, *J* = 7.6 Hz, 0.8 Hz, 1H), 7.70 (dd, *J* = 8.8 Hz, 5.6 Hz, 1H), 7.79 (d, *J* = 7.6 Hz, 1H); **<sup>13</sup>C NMR** (100 MHz, CDCl<sub>3</sub>) δ 55.4, 114.6, 115.0 (d, <sup>2</sup>*J*<sub>F-C</sub> = 21.9 Hz), 117.3 (d, <sup>2</sup>*J*<sub>F-C</sub> = 22.1 Hz), 122.4, 125.8 (d, <sup>4</sup>*J*<sub>F-C</sub> = 2.6 Hz), 126.5, 130.3, 130.9, 131.1, 132.6 (d, <sup>3</sup>*J*<sub>F-C</sub> = 9.3 Hz), 133.0, 133.1, 139.8, 144.0 (d, <sup>3</sup>*J*<sub>F-C</sub> = 8.6 Hz), 160.2, 164.9 (d, <sup>1</sup>*J*<sub>F-C</sub> = 252.1 Hz), 173.6; **HRMS** (ESI, *m/z*) calcd for C<sub>20</sub>H<sub>14</sub>FN<sub>2</sub>O<sub>3</sub>S [M+H]<sup>+</sup> 368.0757, found 368.0763.

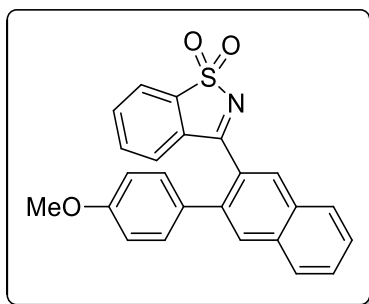

### 3-(3-(4-methoxyphenyl)naphthalen-2-yl)benzo[d]isothiazole 1,1-dioxide (3nb):

**Yield** 88% (70 mg); colourless solid; **R<sub>f</sub>** 0.6 (petroleum ether/ethyl acetate = 7:3); **eluent composition** petroleum ether/ethyl acetate = 7:3; **mp** 80-82 °C; **<sup>1</sup>H NMR** (400 MHz, CDCl<sub>3</sub>) δ 3.71 (s, 3H), 6.81 (d, *J* = 8.8 Hz, 2H), 6.95 (d, *J* = 7.6 Hz, 1H), 7.31 (app t, *J* = 7.6 Hz, 1H), 7.38-7.40 (comp, 2H), 7.52 (app t, *J* = 7.6 Hz, 1H), 7.59 (app t, *J* = 7.6 Hz, 1H), 7.65 (app t, *J* = 7.6 Hz, 1H), 7.82 (d, *J* = 7.6 Hz, 1H), 7.97 (d, *J* = 8.0 Hz, 2H), 8.04 (s, 1H), 8.27 (s, 1H); **<sup>13</sup>C NMR** (100 MHz, CDCl<sub>3</sub>) δ 55.4, 114.5, 122.2, 126.8, 127.3, 128.1, 128.3, 128.8, 128.8, 129.4, 130.4, 130.9, 131.3, 131.8, 132.4, 132.9, 133.1, 135.0, 137.2, 139.7, 159.6, 174.4; **HRMS** (ESI, *m/z*) calcd for C<sub>24</sub>H<sub>17</sub>NO<sub>3</sub>S [M+H]<sup>+</sup> 400.1007, found 400.1008.

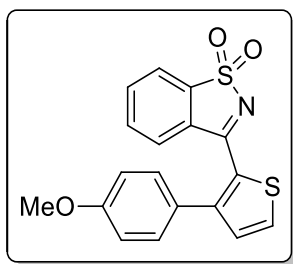

### 3-(3-(4-methoxyphenyl)thiophen-2-yl)benzo[d]isothiazole 1,1-dioxide (3ob):

**Yield** 82% (58 mg); colourless solid; **R<sub>f</sub>** 0.4 (petroleum ether/ethyl acetate = 7:3); **eluent composition** petroleum ether/ethyl acetate = 7:3; **mp** 136-138 °C; **<sup>1</sup>H NMR** (400 MHz, CDCl<sub>3</sub>) δ 3.76 (s, 3H), 6.80-6.84 (comp, 2H), 6.96 (d, *J* = 7.6 Hz, 1H), 7.25 (dd, *J* = 7.6 Hz, 0.8 Hz, 1H), 7.27-7.30 (comp, 2H), 7.34 (d, *J* = 4.8 Hz, 1H), 7.55 (td, *J* = 7.5 Hz, 0.92 Hz, 1H), 7.73 (d, *J* = 4.8 Hz, 1H), 7.86 (d, *J* = 7.6 Hz, 1H); **<sup>13</sup>C NMR** (100 MHz, CDCl<sub>3</sub>) δ 55.5, 114.6, 122.4, 126.8, 127.5, 128.0, 130.3, 130.7, 131.2, 132.2, 133.0, 133.0, 140.7, 147.6, 160.3, 166.7; **HRMS** (ESI, *m/z*) calcd for C<sub>18</sub>H<sub>13</sub>NO<sub>3</sub>S<sub>2</sub> [M+H]<sup>+</sup> 356.0415, found 356.0414.

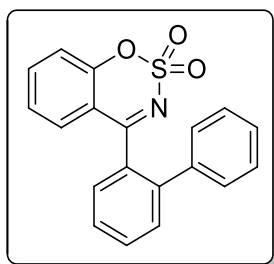

### 4-([1,1'-biphenyl]-2-yl)benzo[e][1,2,3]oxathiazine 2,2-dioxide (5aa):

**Yield** 95% (64 mg); colourless solid; **R<sub>f</sub>** 0.5 (petroleum ether/ethyl acetate = 7:3); **eluent composition** petroleum ether/ethyl acetate = 7:3; **mp** 78-80 °C; **<sup>1</sup>H NMR** (400 MHz, CDCl<sub>3</sub>) δ 6.97-7.01 (m, 1H), 7.10 (dd, *J* = 8.0 Hz, 1.6 Hz, 1H), 7.12-7.15 (comp, 2H), 7.20 (app t, *J* = 7.4 Hz, 2H), 7.23-7.25 (comp, 2H), 7.46 (td, *J* = 7.8 Hz, 1.5 Hz, 1H), 7.54-7.58 (comp, 2H), 7.67-7.72 (comp, 2H); **<sup>13</sup>C NMR** (100 MHz, CDCl<sub>3</sub>) δ 117.1, 118.7, 125.4, 127.9, 128.0, 128.7, 129.1, 130.4, 130.5, 131.2, 132.1, 133.3, 136.7, 139.5, 142.2, 153.8, 178.7; **HRMS** (ESI, *m/z*) calcd for C<sub>19</sub>H<sub>13</sub>NO<sub>3</sub>S [M+Na]<sup>+</sup> 358.0514, found 358.0518.

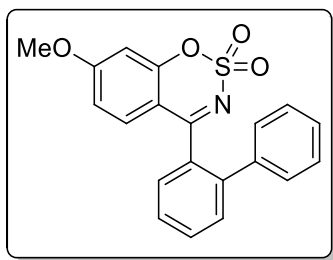

**4-([1,1'-biphenyl]-2-yl)-7-methoxybenzo[e][1,2,3]oxathiazine2,2-dioxide (5ba):**

**Yield** 74% (54 mg); colourless solid; **R<sub>f</sub>** 0.7 (petroleum ether/ethyl acetate = 7:3); **eluent composition** petroleum ether/ethyl acetate = 7:3; **mp** 56-58 °C; **<sup>1</sup>H NMR** (400 MHz, CDCl<sub>3</sub>) δ 3.84 (s, 3H), 6.53 (dd, *J* = 9.0 Hz, 2.6 Hz, 1H), 6.63 (d, *J* = 2.4 Hz, 1H), 7.05 (d, *J* = 8.8 Hz, 1H), 7.18-7.22 (m, 1H), 7.24-7.26 (m, 1H), 7.27-7.31 (comp, 3H), 7.56 (td, *J* = 6.6 Hz, 1.2 Hz, 1H), 7.59 (d, *J* = 4.8 Hz, 1H), 7.64-7.66 (m, 1H), 7.70 (td, *J* = 7.6 Hz, 1.5 Hz, 1H); **<sup>13</sup>C NMR** (100 MHz, CDCl<sub>3</sub>) δ 56.3, 102.8, 110.5, 112.9, 127.8, 127.9, 128.7, 129.0, 130.2, 130.5, 131.8, 132.9, 133.5, 139.5, 141.9, 156.3, 166.3, 177.8; **HRMS** (ESI, *m/z*) calcd for C<sub>20</sub>H<sub>15</sub>NO<sub>4</sub>S [M+H]<sup>+</sup> 366.0800, found 366.0840.

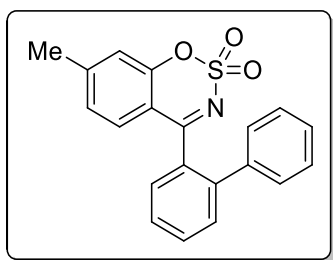

**4-([1,1'-biphenyl]-2-yl)-7-methylbenzo[e][1,2,3]oxathiazine2,2-dioxide (5ca):**

**Yield** 79% (55 mg); colourless solid; **R<sub>f</sub>** 0.6 (petroleum ether/ethyl acetate = 7:3); **eluent composition** petroleum ether/ethyl acetate = 7:3; **mp** 154-156 °C; **<sup>1</sup>H NMR** (400 MHz, CDCl<sub>3</sub>) δ 2.33 (s, 3H), 6.79 (d, *J* = 8.0 Hz, 1H), 6.95 (app s, 1H), 6.98 (d, *J* = 8.0 Hz, 1H), 7.15 (t, *J* = 7.0 Hz, 1H), 7.21 (app t, *J* = 7.4 Hz, 2H), 7.25 (d, *J* = 7.2 Hz, 2H), 7.52-7.57 (comp, 2H), 7.63-7.69 (comp, 2H); **<sup>13</sup>C NMR** (100 MHz, CDCl<sub>3</sub>) δ 22.2, 114.8, 118.9, 126.4, 127.8, 127.9, 128.7, 129.1, 130.3, 130.5, 131.0, 131.9, 133.4, 139.6, 142.1, 149.2, 153.9, 178.4; **HRMS** (ESI, *m/z*) calcd for C<sub>20</sub>H<sub>15</sub>NO<sub>3</sub>S [M+Na]<sup>+</sup> 372.0670, found 372.0662.

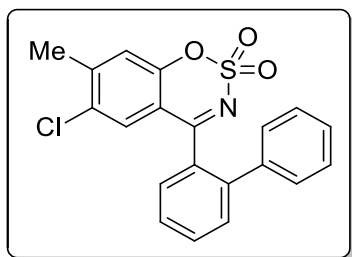

**4-([1,1'-biphenyl]-2-yl)-6-chloro-7methylbenzo[e][1,2,3] oxathiazine2,2-dioxide (5da):**

**Yield** 51% (39 mg); colourless solid; **R<sub>f</sub>** 0.6 (petroleum ether/ethyl acetate = 7:3); **eluent composition** petroleum ether/ethyl acetate = 7:3; **mp** 160-162 °C; **<sup>1</sup>H NMR** (400 MHz, CDCl<sub>3</sub>) δ 2.33 (s, 3H), 7.00 (d, *J* = 8.0 Hz, 2H), 7.15-7.17 (m, 1H), 7.23-7.24 (comp, 4H), 7.58-7.72 (comp, 4H); **<sup>13</sup>C NMR** (100 MHz, CDCl<sub>3</sub>) δ 21.1, 115.7, 120.6, 128.1, 128.1, 128.8, 129.0, 130.6, 130.6, 130.9, 131.0, 132.4, 132.8, 139.6, 142.3, 146.5, 151.9, 177.5; **HRMS** (ESI, *m/z*) calcd for C<sub>20</sub>H<sub>15</sub>ClNO<sub>3</sub>S [M+Na]<sup>+</sup> 384.0461, found 384.0481.

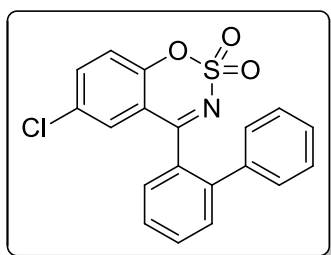

**4-([1,1'-biphenyl]-2-yl)-6-chlorobenzo[e][1,2,3]oxathiazine 2,2-dioxide (5ea):**

**Combined Yield** 72% (54 mg); **mono:bis** 17:1; colourless solid; **R<sub>f</sub>** 0.4 (petroleum ether/ethyl acetate = 7:3); **eluent composition** petroleum ether/ethyl acetate = 7:3; **mp** 144-146 °C; **<sup>1</sup>H NMR** (400 MHz, CDCl<sub>3</sub>) δ 6.99 (d, *J* = 2.4 Hz, 1H), 7.07 (d, *J* = 8.4 Hz, 1H), 7.12-7.17 (m, 1H), 7.22-7.23 (comp, 4H), 7.36 (dd, *J* = 8.8 Hz, 2.4Hz, 1H), 7.60 (app t, *J* = 7.4 Hz, 2H), 7.72-7.75 (comp, 2H); **<sup>13</sup>C NMR** (100 MHz, CDCl<sub>3</sub>) δ 117.7, 120.1, 128.2, 128.3, 128.7, 128.9, 129.0, 130.6, 130.6, 130.7, 132.6, 132.7, 136.2, 139.6, 142.4, 152.0, 177.7; **HRMS** (ESI, *m/z*) calcd for C<sub>19</sub>H<sub>12</sub>ClNO<sub>3</sub>S [M+H]<sup>+</sup> 370.0305, found 370.0292.

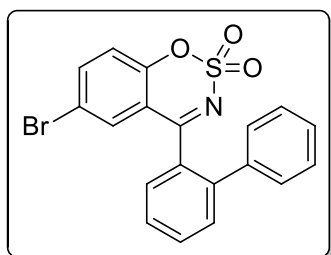

**4-([1,1'-biphenyl]-2-yl)-6-bromobenzo[*e*][1,2,3]oxathiazine 2,2-dioxide (5fa):**

**Combined Yield** 75% (62 mg); **mono:bis** 18:1; colourless solid; **R<sub>f</sub>** 0.5 (petroleum ether/ethyl acetate = 7:3); **eluent composition** petroleum ether/ethyl acetate = 7:3; **mp** 120-122 °C; **<sup>1</sup>H NMR** (400 MHz, CDCl<sub>3</sub>) δ 7.00 (d, *J* = 8.8 Hz, 1H), 7.13-7.17 (comp, 2H), 7.22-7.26 (comp, 4H), 7.50 (dd, *J* = 8.8 Hz, 2.0 Hz, 1H), 7.58-7.62 (comp, 2H), 7.72-7.76 (comp, 2H); **<sup>13</sup>C NMR** (100 MHz, CDCl<sub>3</sub>) δ 118.0, 118.0, 120.3, 128.2, 128.3, 128.9, 129.0, 130.6, 130.8, 132.7, 132.7, 133.6, 139.0, 139.6, 142.4, 152.5, 177.6; **HRMS** (ESI, *m/z*) calcd for C<sub>19</sub>H<sub>12</sub>BrNO<sub>3</sub>S [M+H]<sup>+</sup> 413.9800, found 413.9820.

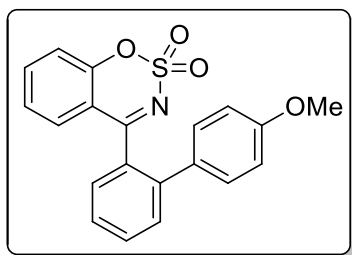

**4-(4'-methoxy-[1,1'-biphenyl]-2-yl)benzo[*e*][1,2,3]oxathiazine 2,2-dioxide (5ab):**

**Combined Yield** 80% (60 mg); **mono:bis** 7:1; colourless solid; **R<sub>f</sub>** 0.7 (petroleum ether/ethyl acetate = 7:3); **eluent composition** petroleum ether/ethyl acetate = 7:3; **mp** 98-100 °C (crystallization from CDCl<sub>3</sub> and hexane); **<sup>1</sup>H NMR** (400 MHz, CDCl<sub>3</sub>) δ 3.70 (s, 3H), 6.71-6.75 (comp, 2H), 6.99 (td, *J* = 7.6 Hz, 0.93 Hz, 1H), 7.07 (dd, *J* = 8.0 Hz, 1.6 Hz, 1H), 7.13-7.18 (comp, 3H), 7.45-7.49 (m, 1H), 7.50-7.54 (comp, 2H), 7.64-7.69 (comp, 2H); **<sup>13</sup>C NMR** (100 MHz, CDCl<sub>3</sub>) δ 55.4, 114.2, 116.9, 118.7, 125.4, 127.5, 130.2, 130.3, 130.4, 131.2, 132.0 (x 2), 133.1, 136.7, 141.7, 153.8, 159.4, 179.0; **HRMS** (ESI, *m/z*) calcd for C<sub>20</sub>H<sub>15</sub>NO<sub>4</sub>S [M+H]<sup>+</sup> 366.0800, found 366.0811.

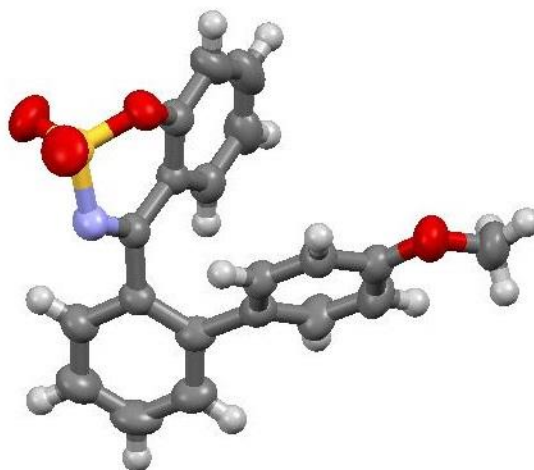

**Figure S2.** X-ray crystal structure of **5ab** (ellipsoid contour at 50% probability level)

|                                             |                                                               |
|---------------------------------------------|---------------------------------------------------------------|
| Empirical formula                           | C <sub>20</sub> H <sub>15</sub> NO <sub>4</sub> S             |
| Formula weight                              | 365.39                                                        |
| Temperature/K                               | 298                                                           |
| Crystal system                              | Monoclinic                                                    |
| Space group                                 | P2 <sub>1</sub> /n                                            |
| a/Å                                         | 8.107(7)                                                      |
| b/Å                                         | 11.495(9)                                                     |
| c/Å                                         | 19.194(16)                                                    |
| α/°                                         | 90                                                            |
| β/°                                         | 93.585(10)                                                    |
| γ/°                                         | 90                                                            |
| Volume/Å <sup>3</sup>                       | 1785(3)                                                       |
| Z                                           | 4                                                             |
| ρ <sub>calc</sub> /cm <sup>3</sup>          | 1.359                                                         |
| μ/mm <sup>-1</sup>                          | 0.206                                                         |
| F(000)                                      | 760.0                                                         |
| Crystal size/mm <sup>3</sup>                | 0.6 × 0.2 × 0.2                                               |
| Radiation                                   | MoKα (λ = 0.71073)                                            |
| 2θ range for data collection/°              | 4.132 to 52.708                                               |
| Index ranges                                | -10 ≤ h ≤ 9, -14 ≤ k ≤ 14, -23 ≤ l ≤ 22                       |
| Reflections collected                       | 22553                                                         |
| Independent reflections                     | 3549 [R <sub>int</sub> = 0.1755, R <sub>sigma</sub> = 0.1126] |
| Data/restraints/parameters                  | 3549/0/236                                                    |
| Goodness-of-fit on F <sup>2</sup>           | 0.966                                                         |
| Final R indexes [I ≥ 2σ (I)]                | R <sub>1</sub> = 0.0956, wR <sub>2</sub> = 0.2265             |
| Final R indexes [all data]                  | R <sub>1</sub> = 0.1832, wR <sub>2</sub> = 0.3164             |
| Largest diff. peak/hole / e Å <sup>-3</sup> | 0.61/-0.94                                                    |

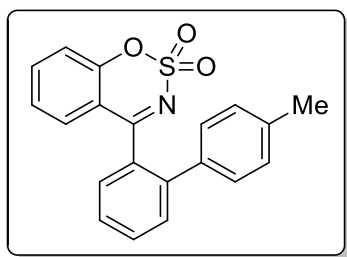

**4-(4'-methyl-[1,1'-biphenyl]-2-yl)benzo[e][1,2,3]oxathiazine 2,2-dioxide (5ac):**

**Combined Yield** 79% (56 mg); **mono:bis** 15:1; colourless solid; **R<sub>f</sub>** 0.6 (petroleum ether/ethyl acetate = 7:3); **eluent composition** petroleum ether/ethyl acetate = 7:3; **mp** 100-124 °C; **<sup>1</sup>H NMR** (400 MHz, CDCl<sub>3</sub>) δ 2.21 (s, 3H), 6.97-7.01 (comp, 3H), 7.09 (dd, *J* = 8.0 Hz, 1.6 Hz, 1H), 7.13-7.15 (comp, 3H), 7.47 (td, *J* = 7.8 Hz, 1.6 Hz, 1H), 7.51-7.56 (comp, 2H), 7.63-7.69 (comp, 2H); **<sup>13</sup>C NMR** (100 MHz, CDCl<sub>3</sub>) δ 21.1, 117.0, 118.6, 125.4, 127.6, 128.9, 129.4, 130.2, 130.5, 131.2, 132.0, 133.1, 136.6, 136.6, 137.8, 142.0, 153.7, 178.9; **HRMS** (ESI, *m/z*) calcd for C<sub>20</sub>H<sub>15</sub>NO<sub>3</sub>S [M+Na]<sup>+</sup> 372.0670, found 372.0671.

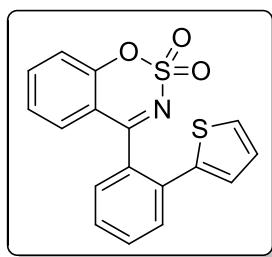

**4-(2-(thiophen-2-yl)phenyl)benzo[e][1,2,3]oxathiazine 2,2-dioxide (5ad):**

**Yield** 60% (41 mg); colourless solid; **R<sub>f</sub>** 0.4 (petroleum ether/ethyl acetate = 7:3); **eluent composition** petroleum ether/ethyl acetate = 7:3; **mp** 128-130 °C; **<sup>1</sup>H NMR** (400 MHz, CDCl<sub>3</sub>) δ 6.81 (dd, *J* = 4.8 Hz, 3.6 Hz, 1H), 6.89 (dd, *J* = 3.6 Hz, 1.2 Hz, 1H), 7.05 (td, *J* = 7.6 Hz, 0.8 Hz, 1H), 7.11 (dd, *J* = 7.8 Hz, 1.8 Hz, 1H), 7.16 (dd, *J* = 5.0 Hz, 1.0 Hz, 1H), 7.20 (dd, *J* = 8.4 Hz, 0.8 Hz, 1H), 7.50-7.56 (comp, 2H), 7.63-7.66 (comp, 3H); **<sup>13</sup>C NMR** (100 MHz, CDCl<sub>3</sub>) δ 117.0, 118.8, 125.6, 127.3, 128.1, 128.1, 128.3, 130.2, 130.5, 130.6, 132.0, 133.2, 134.4, 136.8, 141.0, 153.8, 178.3; **HRMS** (ESI, *m/z*) calcd for C<sub>17</sub>H<sub>11</sub>NO<sub>3</sub>S<sub>2</sub> [M+H]<sup>+</sup> 342.0259, found 342.0293.

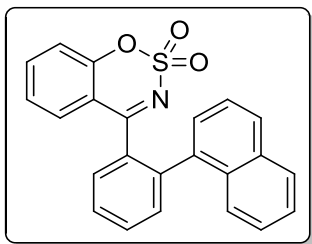

**4-(2-(naphthalen-1-yl)phenyl)benzo[e][1,2,3]oxathiazine 2,2-dioxide (5ae):**

**Yield** 45% (35 mg); colourless solid; **R<sub>f</sub>** 0.5 (petroleum ether/ethyl acetate = 7:3); **eluent composition** petroleum ether/ethyl acetate = 7:3; **mp** 102-104 °C; **<sup>1</sup>H NMR** (400 MHz, CDCl<sub>3</sub>) δ 6.91 (d, *J* = 8.0 Hz, 1H), 7.13 (d, *J* = 6.8 Hz, 1H), 7.24-7.40 (comp, 4H), 7.42-7.48 (comp, 2H), 7.60 (d, *J* = 7.6 Hz, 1H), 7.66-7.68 (comp, 2H), 7.71-7.74 (m, 1H), 7.75-7.77 (m, 1H), 7.80-7.82 (comp, 2H); **<sup>13</sup>C NMR** (100 MHz, CDCl<sub>3</sub>) δ 116.8, 118.2, 119.6, 124.6, 125.0, 125.8, 126.2, 126.7, 128.3 (x 2), 128.5, 128.7 (x 2), 129.0, 130.4, 130.7, 131.3, 132.1, 133.6, 134.9, 136.2, 153.1, 178.4; **HRMS** (ESI, *m/z*) calcd for C<sub>23</sub>H<sub>15</sub>NO<sub>3</sub>S [M+H]<sup>+</sup> 386.0851, found 386.0883.

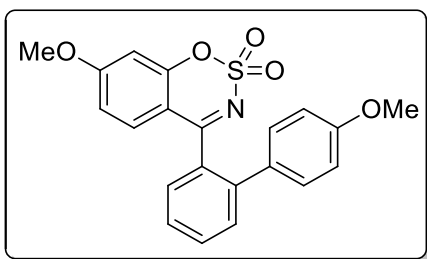

**7-methoxy-4-(4'-methoxy-[1,1'-biphenyl]-2-yl)benzo[e][1,2,3]oxathiazine 2,2-dioxide (5bb):**

**Yield** 78% (62 mg); colourless solid; **R<sub>f</sub>** 0.7 (petroleum ether/ethyl acetate = 7:3); **eluent composition** petroleum ether/ethyl acetate = 7:3; **mp** 94-96 °C; **<sup>1</sup>H NMR** (400 MHz, CDCl<sub>3</sub>) δ 3.72 (s, 3H), 3.81 (s, 3H), 6.49 (dd, *J* = 8.8 Hz, 2.4 Hz, 1H), 6.60 (d, *J* = 2.4 Hz, 1H), 6.74-6.78 (comp, 2H), 6.98 (d, *J* = 9.2 Hz, 1H), 7.18-7.21 (comp, 2H), 7.47-7.52 (comp, 2H), 7.58 (dd, *J* = 7.8 Hz, 1 Hz, 1H), 7.63 (td, *J* = 7.5 Hz, 1.2 Hz, 1H); **<sup>13</sup>C NMR** (100 MHz, CDCl<sub>3</sub>) δ 55.4, 56.3, 102.8, 110.4, 112.9, 114.2, 127.4, 130.2, 130.2, 130.3, 131.7, 132.0, 132.9, 133.3, 141.4, 156.3, 159.4, 166.3, 178.1; **HRMS** (ESI, *m/z*) calcd for C<sub>21</sub>H<sub>17</sub>NO<sub>5</sub>S [M+Na]<sup>+</sup> 418.0725, found 418.0739.

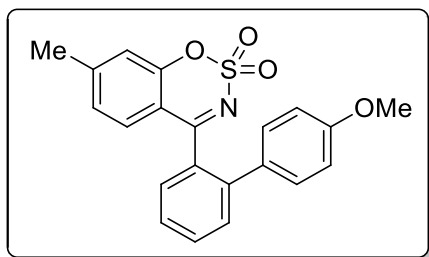

**4-(4'-methoxy-[1,1'-biphenyl]-2-yl)-7-methylbenzo[e] [1,2,3]oxathiazine-2,2-dioxide (5cb):**

**Yield** 75% (55 mg); colourless solid; **R<sub>f</sub>** 0.7 (petroleum ether/ethyl acetate = 7:3); **eluent composition** petroleum ether/ethyl acetate = 7:3; **mp** 108-110 °C; **<sup>1</sup>H NMR** (400 MHz, CDCl<sub>3</sub>) δ 2.34 (s, 3H), 3.72 (s, 3H), 6.73-6.76 (comp, 2H), 6.79 (dd, *J* = 8.0 Hz, 0.8 Hz, 1H), 6.94-6.96 (comp, 2H), 7.16-7.20 (comp, 2H), 7.48-7.53 (comp, 2H), 7.60-7.67 (comp, 2H); **<sup>13</sup>C NMR** (100 MHz, CDCl<sub>3</sub>) δ 22.2, 55.4, 114.3, 114.7, 119.0, 126.4, 127.4, 130.2 (x 2), 130.4, 131.0, 131.8, 132.1, 133.2, 141.6, 149.1, 154.0, 159.4, 178.7; **HRMS** (ESI, *m/z*) calcd for C<sub>21</sub>H<sub>17</sub>NO<sub>4</sub>S [M+Na]<sup>+</sup> 402.0775, found 402.0776.

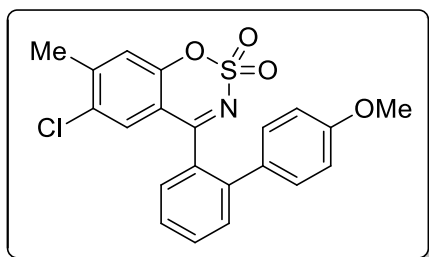

**6-chloro-4-(4'-methoxy-[1,1'-biphenyl]-2-yl)-7-methylbenzo[e][1,2,3]oxathiazine-2,2-dioxide (5db):**

**Yield** 52% (45 mg); colourless solid; **R<sub>f</sub>** 0.6 (petroleum ether/ethyl acetate = 7:3); **eluent composition** petroleum ether/ethyl acetate = 7:3; **mp** 122-124 °C; **<sup>1</sup>H NMR** (400 MHz, CDCl<sub>3</sub>) δ 2.34 (s, 3H), 3.72 (s, 3H), 6.76 (d, *J* = 8.4 Hz, 2H), 6.97 (s, 1H), 7.03 (s, 1H), 7.16 (d, *J* = 8.4 Hz, 2H), 7.52-7.56 (comp, 2H), 7.65-7.70 (comp, 2H); **<sup>13</sup>C NMR** (100 MHz, CDCl<sub>3</sub>) δ 21.1, 55.5, 114.4, 115.6, 120.7, 127.7, 130.2, 130.5 (x 2), 130.9, 131.0, 132.1, 132.4, 132.7, 141.8, 146.4, 152.0, 159.5, 177.7; **HRMS** (ESI, *m/z*) calcd for C<sub>21</sub>H<sub>17</sub>ClNO<sub>4</sub>S [M+H]<sup>+</sup> 414.0567, found 414.0601.

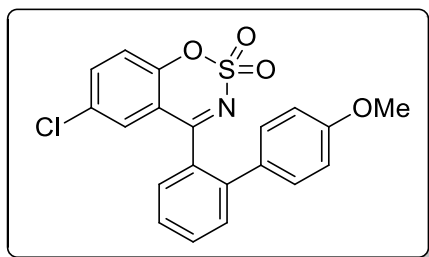

**6-chloro-4-(4'-methoxy-[1,1'-biphenyl]-2-yl)benzo[e] [1,2,3]oxathiazine 2,2-dioxide (5eb):**

**Yield** 76% (61 mg); colourless solid; **R<sub>f</sub>** 0.4 (petroleum ether/ethyl acetate = 7:3); **eluent composition** petroleum ether/ethyl acetate = 7:3; **mp** 118-120 °C; **<sup>1</sup>H NMR** (400 MHz, CDCl<sub>3</sub>) δ 3.71 (s, 3H), 6.75-6.78 (comp, 2H), 6.97 (d, *J* = 2.4 Hz, 1H), 7.09 (d, *J* = 8.8 Hz, 1H), 7.14-7.17 (comp, 2H), 7.38 (dd, *J* = 8.8 Hz, 2.4 Hz, 1H), 7.54-7.58 (comp, 2H), 7.69-7.73 (comp, 2H); **<sup>13</sup>C NMR** (100 MHz, CDCl<sub>3</sub>) δ 55.5, 114.4, 117.6, 120.1, 127.8, 130.2, 130.5, 130.6, 130.6, 130.7, 132.0, 132.5, 132.6, 136.2, 141.9, 152.1, 159.5, 177.9; **HRMS** (ESI, *m/z*) calcd for C<sub>20</sub>H<sub>14</sub>ClNO<sub>4</sub>S [M+H]<sup>+</sup> 400.0410, found 400.0434.

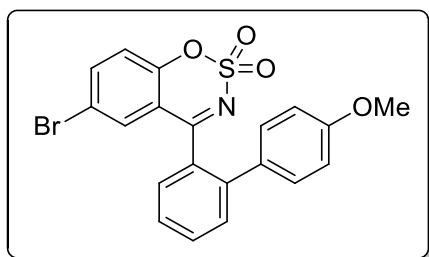

**6-bromo-4-(4'-methoxy-[1,1'-biphenyl]-2-yl)benzo[e] [1,2,3]oxathiazine 2,2-dioxide (5fb):**

**Yield** 72% (64 mg); colourless solid; **R<sub>f</sub>** 0.5 (petroleum ether/ethyl acetate = 7:3); **eluent composition** petroleum ether/ethyl acetate = 7:3; **mp** 120-124 °C; **<sup>1</sup>H NMR** (400 MHz, CDCl<sub>3</sub>) δ 3.72 (s, 3H), 6.75-6.78 (comp, 2H), 7.02 (d, *J* = 8.4 Hz, 1H), 7.11-7.16 (comp, 3H), 7.50-7.56 (comp, 3H), 7.71-7.75 (comp, 2H); **<sup>13</sup>C NMR** (100 MHz, CDCl<sub>3</sub>) δ 55.5, 114.4, 117.9, 118.0, 120.3, 127.8, 130.2, 130.5, 130.7, 132.1, 132.5, 132.6, 133.6, 139.0, 142.0, 152.6, 159.6, 177.8; **HRMS** (ESI, *m/z*) calcd for C<sub>20</sub>H<sub>14</sub>BrNO<sub>4</sub>S [M+H]<sup>+</sup> 443.9905, found 443.9901.

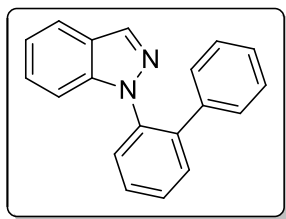

**1-([1,1'-biphenyl]-2-yl)-1H-indazole (6):**

**Combined Yield** 94% (28 mg, 0.1 mmol scale); **mono:bis** 1.5:1; colourless oil; **R<sub>f</sub>** 0.4 (petroleum ether/ethyl acetate = 19:1); **eluent composition** petroleum ether/ethyl acetate = 19:1; **<sup>1</sup>H NMR** (400 MHz, CDCl<sub>3</sub>) δ 7.01-7.02 (m, 1H), 7.07-7.08 (comp, 3H), 7.09-7.11 (comp, 3H), 7.14-7.18 (m, 1H), 7.56-7.58 (comp, 3H), 7.61 (dd, *J* = 8.0 Hz, 1.6 Hz, 1H), 7.67-7.69 (m, 1H), 8.11 (d, *J* = 0.8 Hz, 1H). The <sup>1</sup>H NMR data correspond with that reported in the literature.<sup>3</sup>

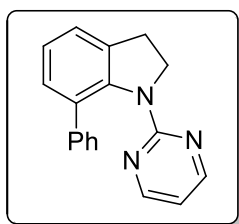

**7-phenyl-1-(pyrimidin-2-yl)indoline (7):**

**Yield** 82% (45 mg); colourless oil; **R<sub>f</sub>** 0.2 (petroleum ether/ethyl acetate = 9:1); **eluent composition** petroleum ether/ethyl acetate = 9:1; **<sup>1</sup>H NMR** (400 MHz, CDCl<sub>3</sub>) δ 3.19 (t, *J* = 8.0 Hz, 2H), 4.47 (t, *J* = 8.0 Hz, 2H), 6.38 (t, *J* = 4.8 Hz, 1H), 7.08-7.11 (m, 1H), 7.12-7.18 (comp, 3H), 7.24 (dd, *J* = 7.6 Hz, 1.2 Hz, 1H), 7.28 (dd, *J* = 8.0 Hz, 0.8 Hz, 1H), 7.32-7.35 (comp, 2H), 7.96 (d, *J* = 4.8 Hz, 2H). The <sup>1</sup>H NMR data correspond with that reported in the literature.<sup>4</sup>

**Synthesis of 7b-([1,1'-biphenyl]-2-yl)-7bH-benzo[d][1,2]oxazireno[2,3-b]isothiazole 3,3-dioxide (8):**

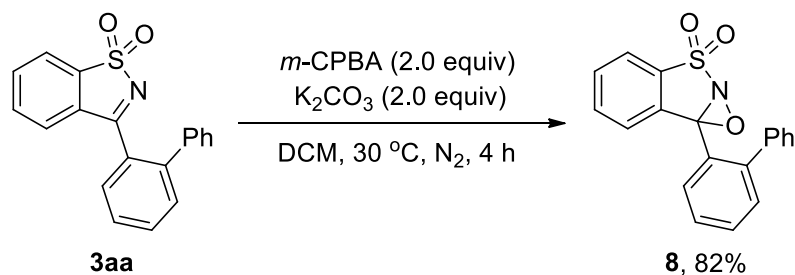

In an oven-dried 10 mL round bottomed flask, **3aa** (64 mg, 0.2 mmol, 1.0 equiv) was taken and to it *m*-CPBA (69 mg, 0.4 mmol, 2.0 equiv), K<sub>2</sub>CO<sub>3</sub> (55 mg, 0.4 mmol, 2.0 equiv) and DCM (10 mL) were added. The reaction mixture was degassed and backfilled with nitrogen. It was then closed with a stopper and kept at 30 °C while stirring for 4 h. After completion of reaction (checked by TLC), the reaction mixture was quenched with saturated NH<sub>4</sub>Cl solution and then it was extracted with ethyl acetate. The combined organic layer were given brine wash and concentrated under vacuo. The crude reaction mixture was subjected to column chromatography using ethyl acetate/petroleum ether as eluent to give **8** in 82% yield.

**Yield** 82% (55 mg); colourless solid; **R<sub>f</sub>** 0.5 (pet ether/ethyl acetate = 4:1); **eluent composition** petroleum ether/ethyl acetate = 4:1; **mp** 88-90 °C (crystallization from CHCl<sub>3</sub>); **<sup>1</sup>H NMR** (400 MHz, CDCl<sub>3</sub>) δ 7.04 (d, *J* = 7.6 Hz, 1H), 7.08 (d, *J* = 7.6 Hz, 1H), 7.18 (app t, *J* = 7.6 Hz, 2H), 7.29 (dd, *J* = 8.0 Hz, 0.8 Hz, 2H), 7.34 (td, *J* = 8.0 Hz, 0.8 Hz, 1H), 7.44 (td, *J* = 8.0 Hz, 0.8 Hz, 1H), 7.49 (dd, *J* = 7.6 Hz, 1.2 Hz, 1H), 7.52-7.56 (comp, 2H), 7.65 (td, *J* = 7.6 Hz, 1.2 Hz, 1H), 7.72 (dd, *J* = 7.6 Hz, 1.2 Hz, 1H); **<sup>13</sup>C NMR** (100 MHz CDCl<sub>3</sub>) δ 85.8, 123.3, 126.5, 127.2, 127.8, 128.0, 128.7, 128.8, 129.4, 131.0, 131.4, 132.0, 133.0, 133.2, 135.4, 139.4, 142.8; **HRMS** (EI, *m/z*) calcd for C<sub>19</sub>H<sub>13</sub>NO<sub>3</sub>S [M<sup>+</sup>] 335.0616, found 335.0608.

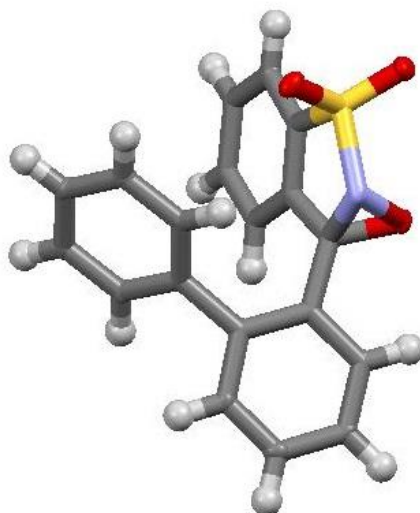

**Figure S3.** X-ray crystal structure of **8** (ellipsoid contour at 50% probability level)

|                                             |                                                               |
|---------------------------------------------|---------------------------------------------------------------|
| Empirical formula                           | C <sub>19</sub> H <sub>13</sub> NO <sub>3</sub> S             |
| Formula weight                              | 335.36                                                        |
| Temperature/K                               | 100.0                                                         |
| Crystal system                              | monoclinic                                                    |
| Space group                                 | P2 <sub>1</sub> /n                                            |
| a/Å                                         | 9.9907(2)                                                     |
| b/Å                                         | 8.1808(2)                                                     |
| c/Å                                         | 19.0908(5)                                                    |
| α/°                                         | 90                                                            |
| β/°                                         | 90.2160(10)                                                   |
| γ/°                                         | 90                                                            |
| Volume/Å <sup>3</sup>                       | 1560.32(6)                                                    |
| Z                                           | 4                                                             |
| ρ <sub>calc</sub> /g/cm <sup>3</sup>        | 1.428                                                         |
| μ/mm <sup>-1</sup>                          | 1.992                                                         |
| F(000)                                      | 696.0                                                         |
| Crystal size/mm <sup>3</sup>                | 0.35 × 0.25 × 0.18                                            |
| Radiation                                   | CuKα (λ = 1.54184)                                            |
| 2θ range for data collection/°              | 10.008 to 130.144                                             |
| Index ranges                                | -11 ≤ h ≤ 11, -9 ≤ k ≤ 9, -22 ≤ l ≤ 22                        |
| Reflections collected                       | 19662                                                         |
| Independent reflections                     | 2642 [R <sub>int</sub> = 0.0914, R <sub>sigma</sub> = 0.0507] |
| Data/restraints/parameters                  | 2642/0/218                                                    |
| Goodness-of-fit on F <sup>2</sup>           | 1.226                                                         |
| Final R indexes [I ≥ 2σ (I)]                | R <sub>1</sub> = 0.0589, wR <sub>2</sub> = 0.1253             |
| Final R indexes [all data]                  | R <sub>1</sub> = 0.0622, wR <sub>2</sub> = 0.1269             |
| Largest diff. peak/hole / e Å <sup>-3</sup> | 0.43/-0.40                                                    |

## Mechanistic experiments:

### (a) Procedure for H/D exchange experiments:

(in absence of arylsiloxane)

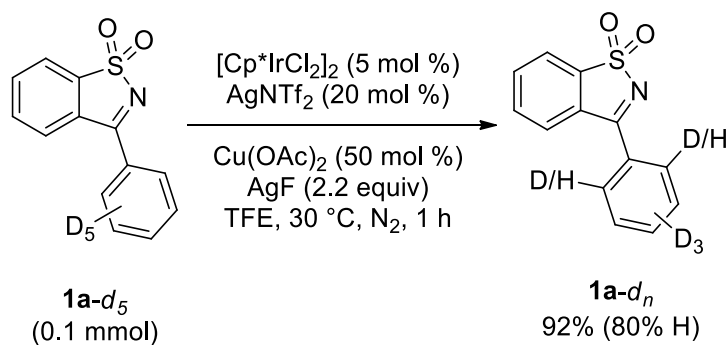

An oven dried 10 mL schlenk tube was charged with **1a-d<sub>5</sub>** (24.3 mg, 0.1 mmol), silver (bistrifluoromethanesulfonyl)imide (7.7 mg, 20 mol %), copper acetate (9.0 mg, 50 mol %), silver fluoride (27.9 mg, 2.2 equiv) and catalyst [Cp\*IrCl<sub>2</sub>]<sub>2</sub> (4.0 mg, 5 mol %). The tube was evacuated and backfilled with nitrogen and to it was added anhydrous TFE (1.0 mL, 0.1 M) under nitrogen atmosphere. The reaction mixture was degassed and backfilled with nitrogen 3 times. It was then closed with teflon-lined cap and kept at 30 °C while stirring for 1 h. After completion of the reaction, the reaction mixture was filtered through a short pad of celite, the solvent was removed under reduced pressure and the crude reaction mixture was directly purified through column chromatography on silica gel using petroleum ether/ethyl acetate (7:3) as eluent to recover the starting material **1a-d<sub>n</sub>** (92%). The proton incorporation (80%) was determined by <sup>1</sup>H NMR spectroscopy.

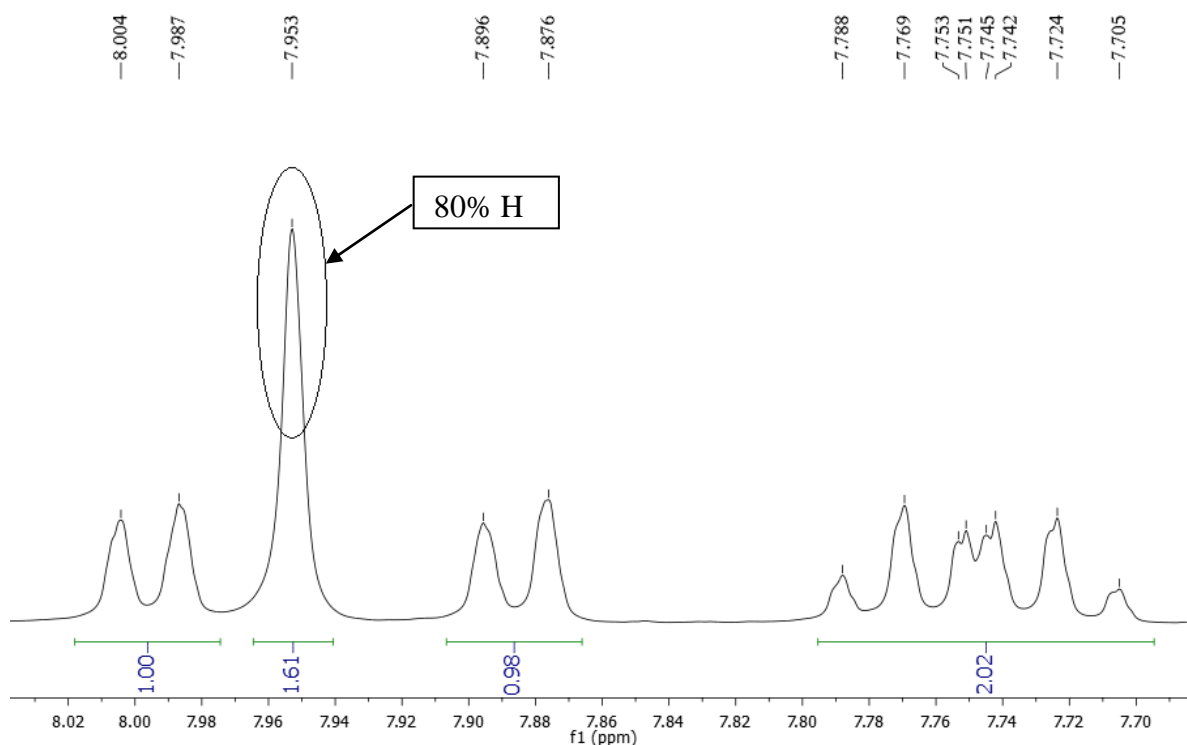

(in presence of arylsiloxane)

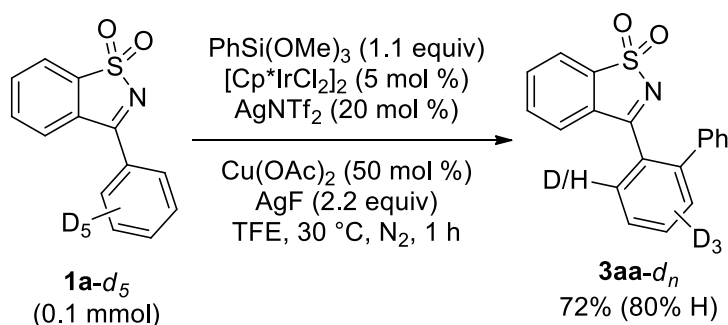

An oven dried 10 mL schlenk tube was charged with **1a-d<sub>5</sub>** (24.3 mg, 0.1 mmol), trimethoxyphenylsilane (20.5  $\mu\text{L}$ , 1.1 equiv), silver (bistrifluoromethanesulfonyl)imide (15.5 mg, 20 mol %), copper acetate (18.1 mg, 50 mol %), silver fluoride (55.8 mg, 2.2 equiv) and catalyst  $[\text{Cp}^*\text{IrCl}_2]_2$  (8.0 mg, 5 mol %). The tube was evacuated and backfilled with nitrogen and to it was added anhydrous TFE (1.0 mL, 0.1 M) under nitrogen atmosphere. The reaction mixture was degassed and backfilled with nitrogen 3 times. It was then closed with teflon-lined cap and kept at 30 °C while stirring for 1 h. After completion of the reaction, the reaction mixture was filtered through a short pad of celite, the solvent was removed under reduced pressure and the crude reaction mixture was directly purified through column chromatography on silica gel using petroleum ether/ethyl acetate (7:3) as eluent yielding the

product **3aa-d<sub>n</sub>** (72%). The proton incorporation (80%) was determined by <sup>1</sup>H NMR spectroscopy.

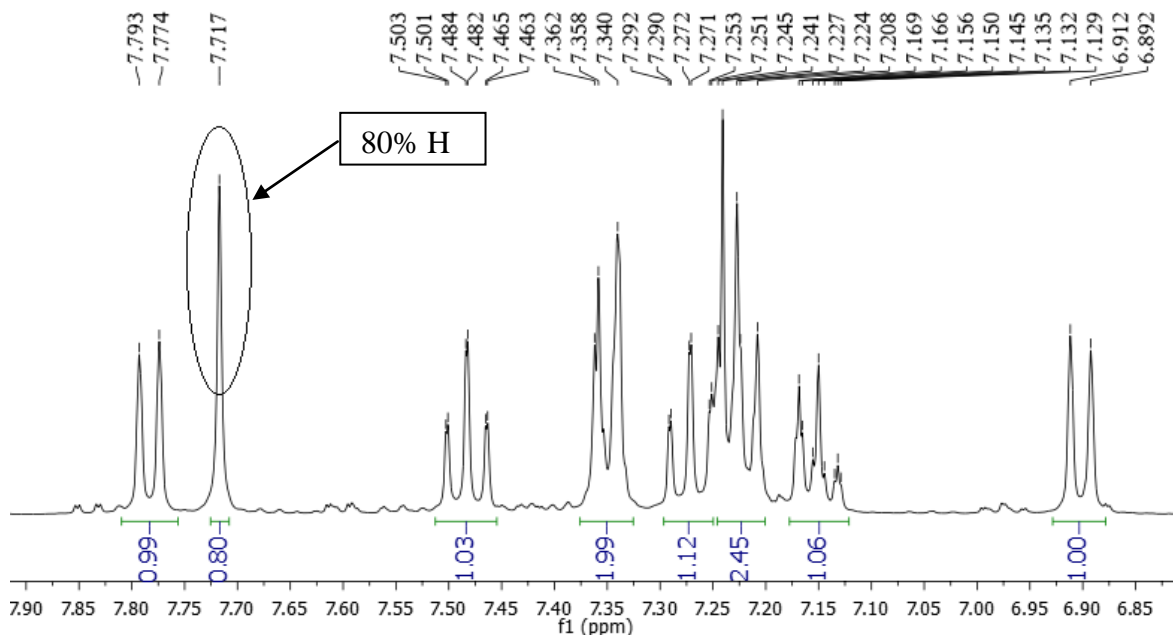

**(b) Procedure for competitive experiment between **1a** and **1a-d<sub>5</sub>**:**

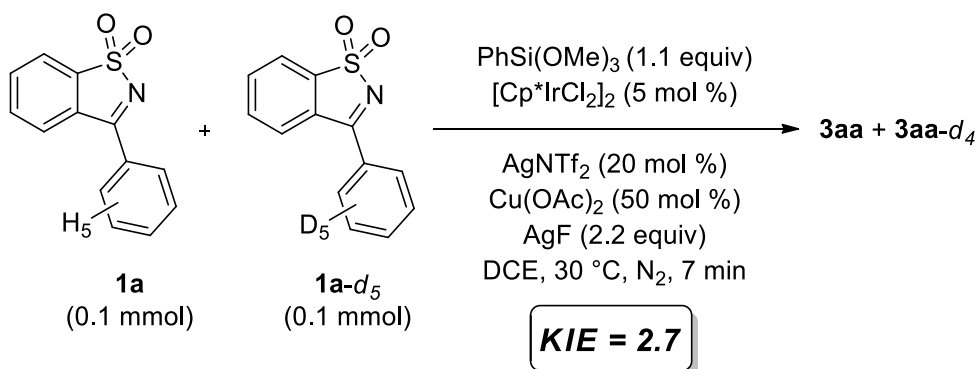

An oven dried 10 mL Schlenk tube was charged with **1a** (24.3 mg, 0.1 mmol), **1a-d<sub>5</sub>** (49.6 mg, 0.1 mmol), trimethoxyphenylsilane (41  $\mu\text{L}$ , 1.1 equiv), silver (bistrifluoromethanesulfonyl) imide (15.5 mg, 20 mol %), copper acetate (18.1 mg, 50 mol %), silver fluoride (55.8 mg, 2.2 equiv) and catalyst  $[\text{Cp}^*\text{IrCl}_2]_2$  (8.0 mg, 5 mol %). The tube was evacuated and backfilled with nitrogen and to it was added anhydrous DCE (2.0 mL, 0.1 M) under nitrogen atmosphere. The reaction mixture was degassed and backfilled with nitrogen 3 times and kept for stirring at 30 °C. After 7 min, the reaction was quickly quenched by adding ethyl acetate keeping in an ice bath. The reaction mixture was filtered through a short pad of celite and concentrated under vacuo. The crude reaction mixture was directly purified by column chromatography on silica gel using petroleum ether/ethyl acetate (7:3) as

eluent. The ratio of **3aa** and **3aa-d<sub>4</sub>** was determined by <sup>1</sup>H NMR spectroscopy. Primary kinetic isotopic effect (KIE) was found be  $k_H/k_D \approx 0.73/0.27 \approx 2.7$ .

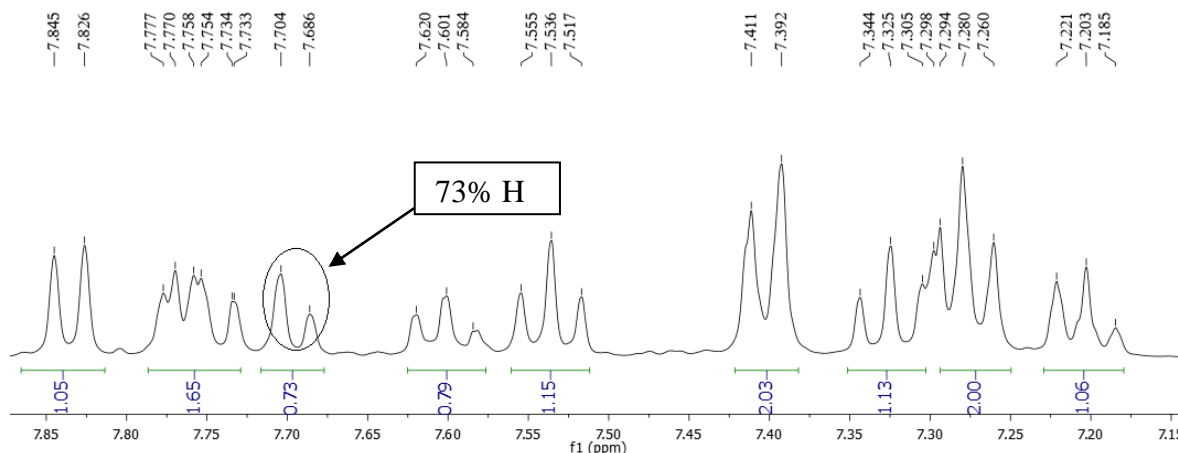

**(c) Procedure for parallel experiment between **1a** and **1a-d<sub>5</sub>**:**

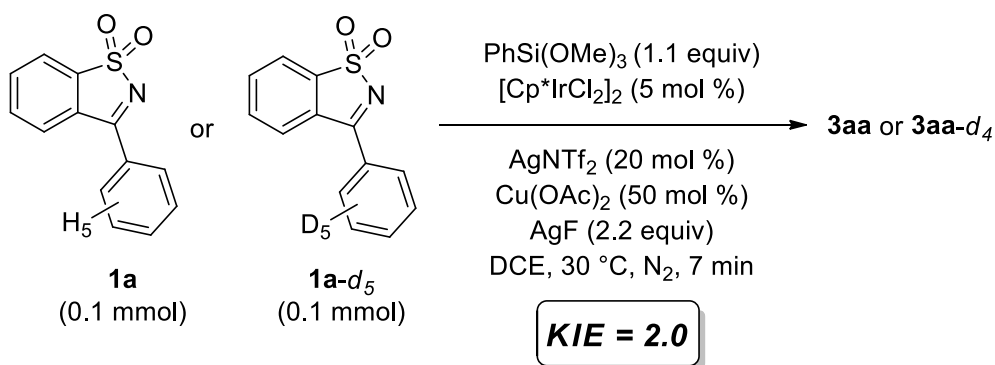

Two separate oven dried 10 mL Schlenk tubes were charged with **1a** (24.3 mg, 0.1 mmol) and **1a-d<sub>5</sub>** (24.8 mg, 0.1 mmol). To each were added trimethoxyphenylsilane (20.5  $\mu$ L, 1.1 equiv), silver (bistrifluoromethanesulfonyl) imide (15.5 mg, 20 mol %), copper acetate (18.1 mg, 50 mol %), silver fluoride (55.8 mg, 2.2 equiv) and catalyst [Cp\*]IrCl2 (8.0 mg, 5 mol %). The tubes were evacuated and backfilled with nitrogen and to it was added anhydrous DCE (1.0 mL, 0.1 M) under nitrogen atmosphere. The reaction mixtures were degassed and backfilled with nitrogen 3 times and kept for stirring at 30 °C. After 7 min, the reactions were quickly quenched by adding ethyl acetate keeping in an ice bath. The reaction mixtures were filtered through a short pad of celite, both the reaction mixtures were combined and concentrated under vacuo. The crude reaction mixture was directly purified by column chromatography on silica gel using petroleum ether/ ethyl acetate (7:3) as eluent. The ratio of **3aa** and **3aa-d<sub>4</sub>** was determined by <sup>1</sup>H NMR spectroscopy. Primary kinetic isotopic effect (KIE) was found be  $k_H/k_D \approx 0.67/0.33 \approx 2.0$ .

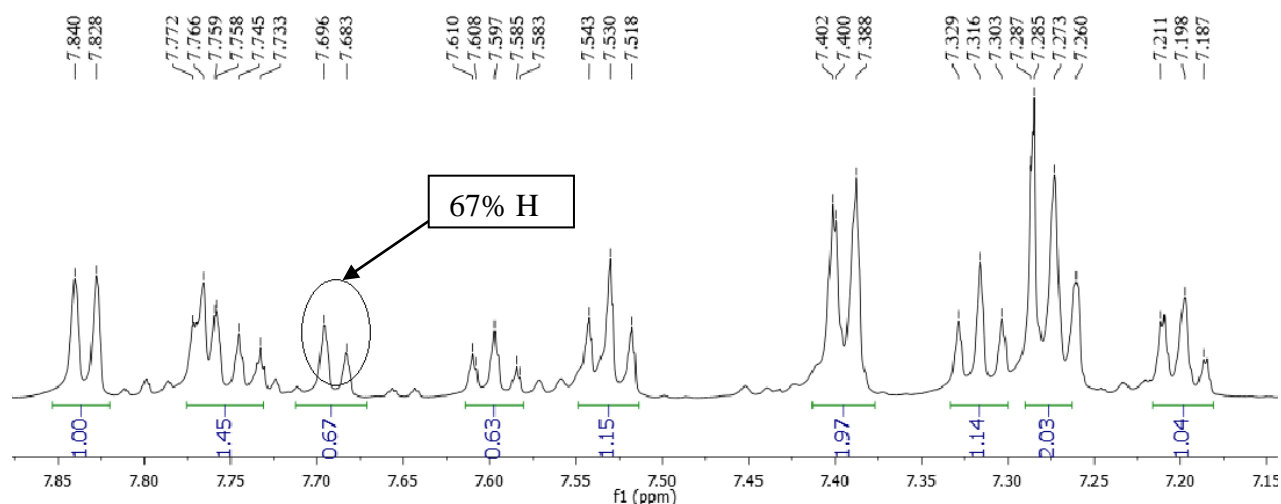

## References:

1. T. Nishimura, A. Noishiki, G. C. Tsui and T. Hayashi, *J. Am. Chem. Soc.*, 2012, **134**, 5056.
2. Y.-Q. Wang, C.-B. Yu, D.-W. Wang, X.-B. Wang and Y.-G. Zhou, *Org. Lett.*, 2008, **10**, 2071.
3. M. Moselage, J. Lie, F. Kramm and L. Ackermann *Angew. Chem. Int. Ed.*, 2017, **56**, 5341.
4. P. B. De, S. Pradhan, S. Banerjee and T. Punniyamurthy *Chem. Commun.*, 2018, **54**, 2494.

# <sup>1</sup>H and <sup>13</sup>C NMR spectra of compounds:

<sup>1</sup>H NMR of **3aa** (400MHz, CDCl<sub>3</sub>):

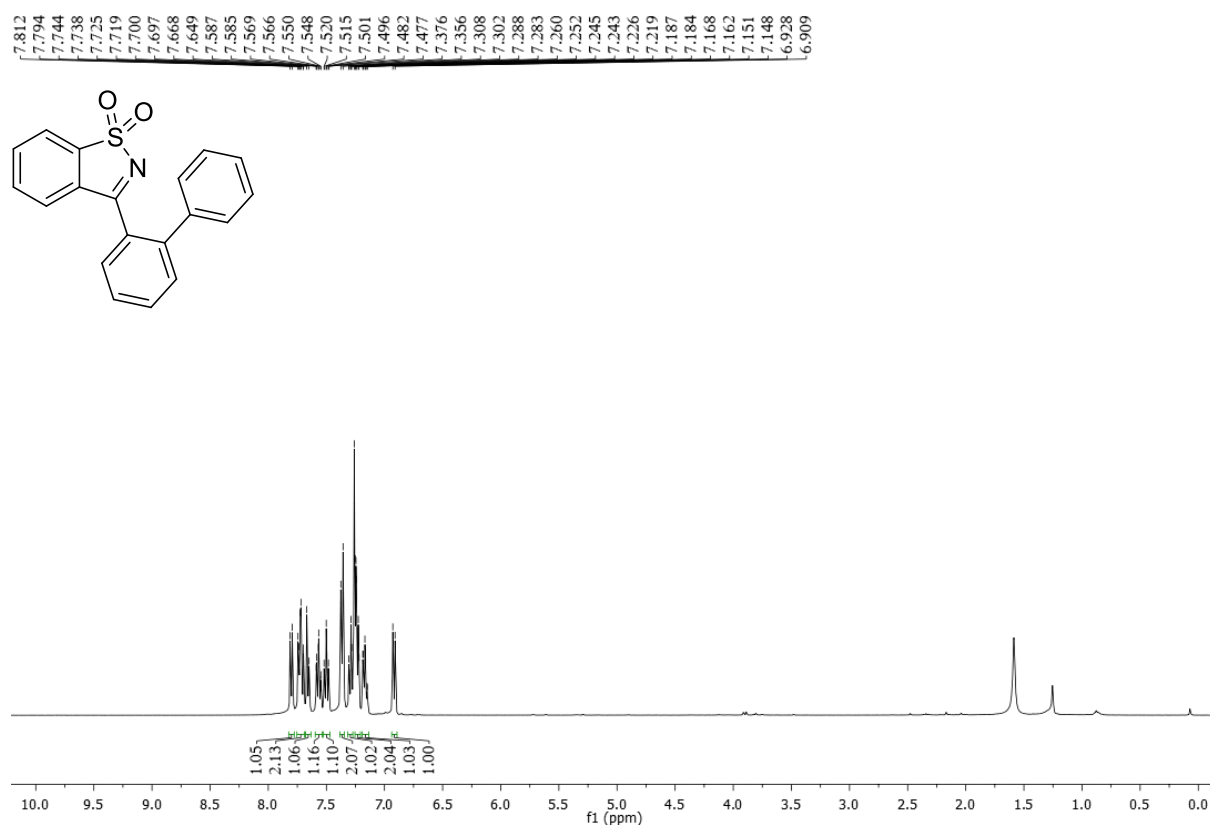

<sup>13</sup>C NMR of **3aa** (100MHz, CDCl<sub>3</sub>):

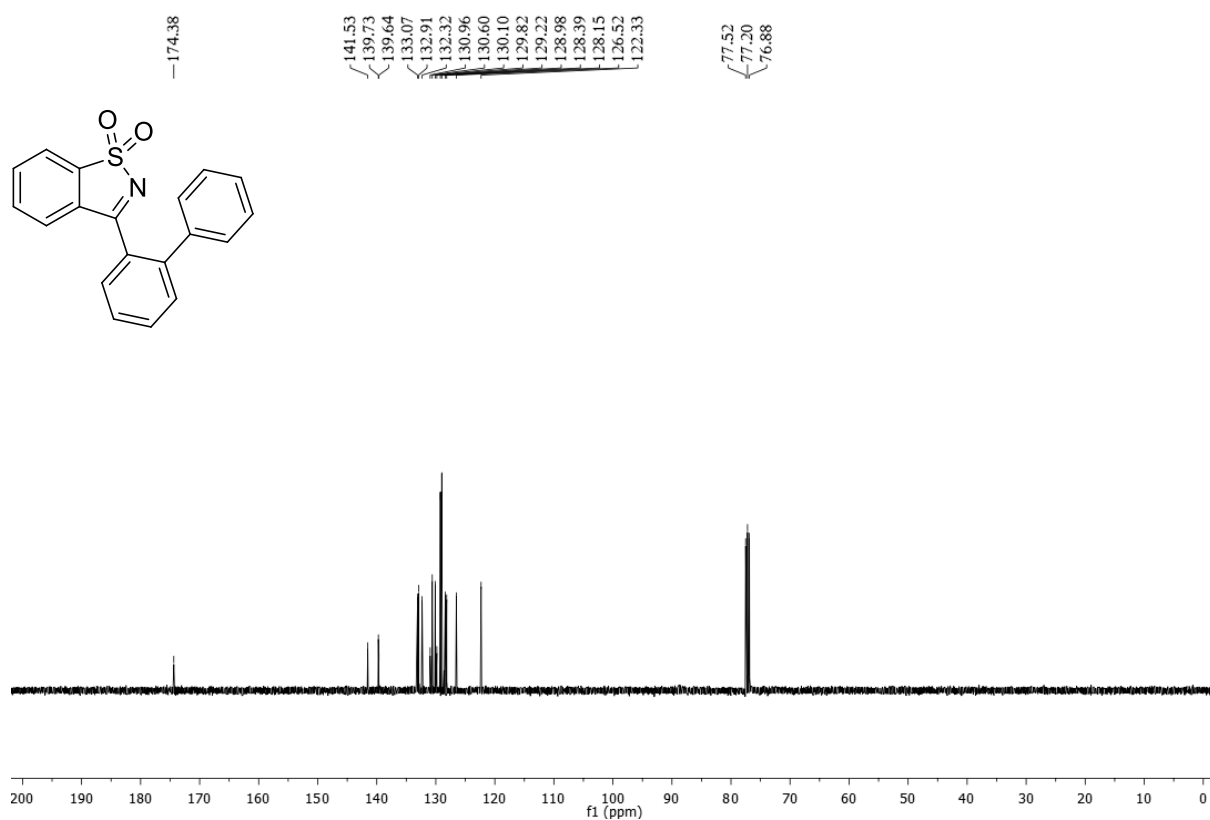

$^1\text{H}$  NMR of **3ba** (400MHz,  $\text{CDCl}_3$ ):

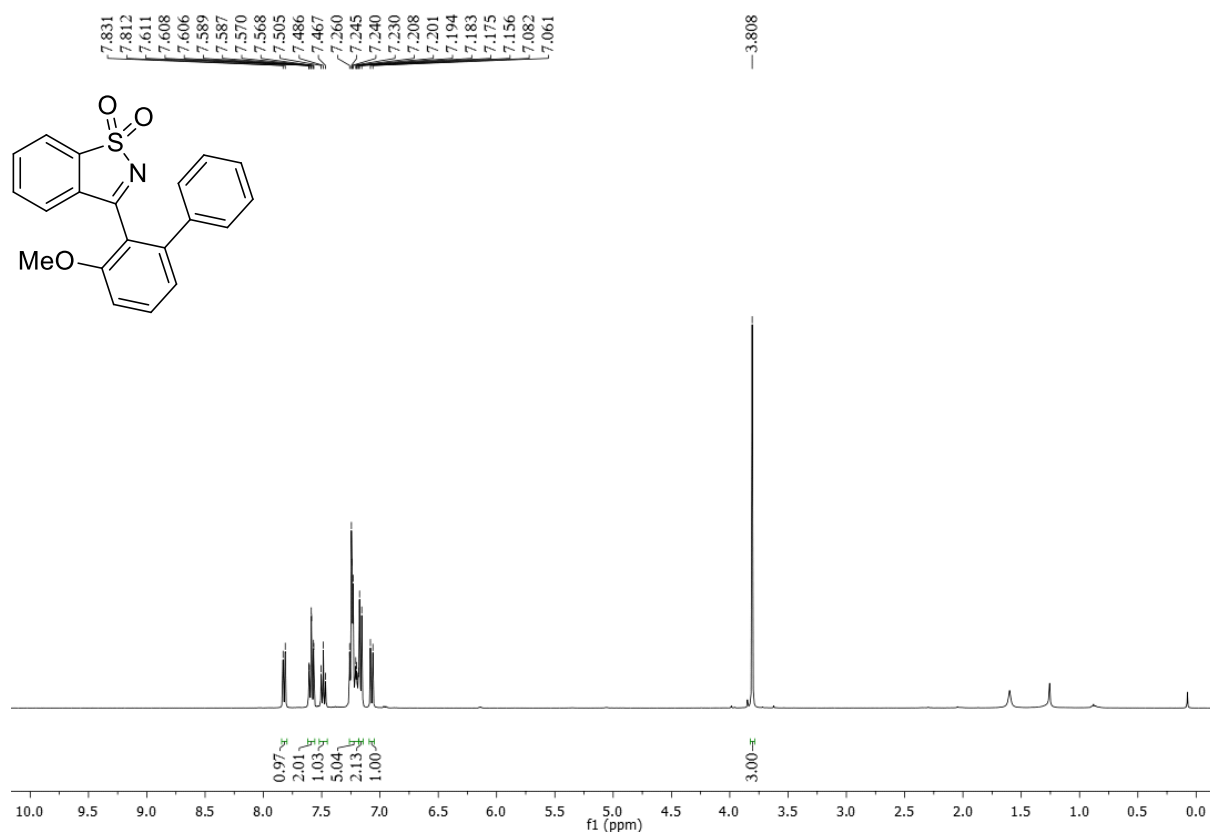

$^{13}\text{C}$  NMR of **3ba** (100MHz,  $\text{CDCl}_3$ ):

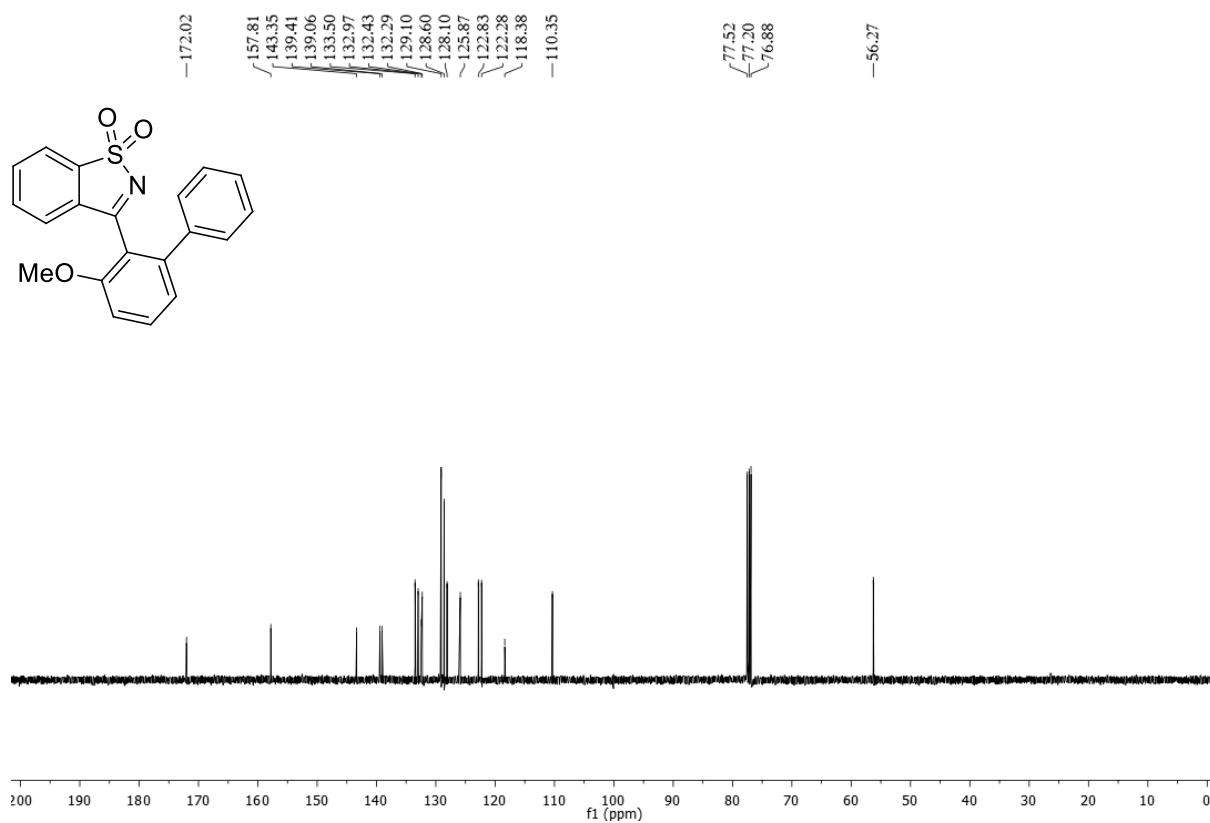

$^1\text{H}$  NMR of **3ca** (400MHz,  $\text{CDCl}_3$ ):

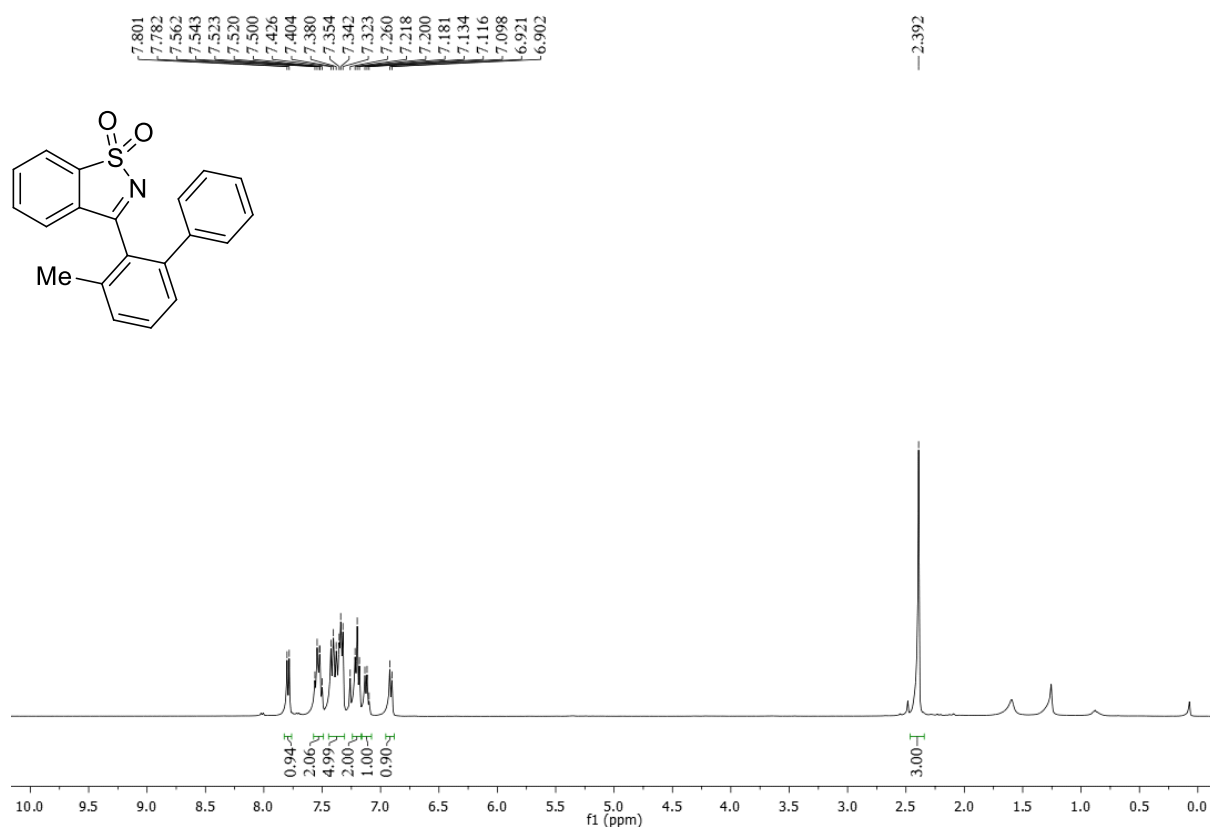

$^{13}\text{C}$  NMR of **3ca** (100MHz,  $\text{CDCl}_3$ ):

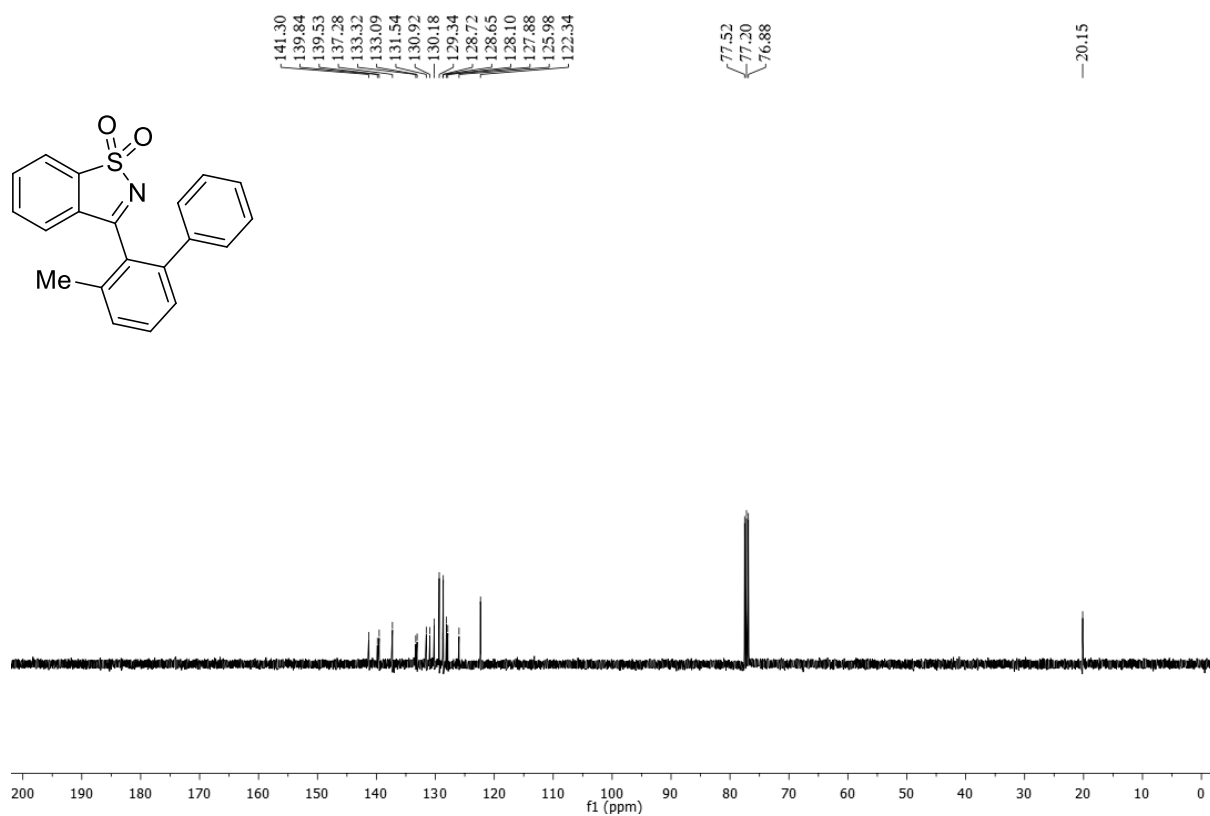

$^1\text{H}$  NMR of **3da** (600 MHz,  $\text{CDCl}_3$ ):

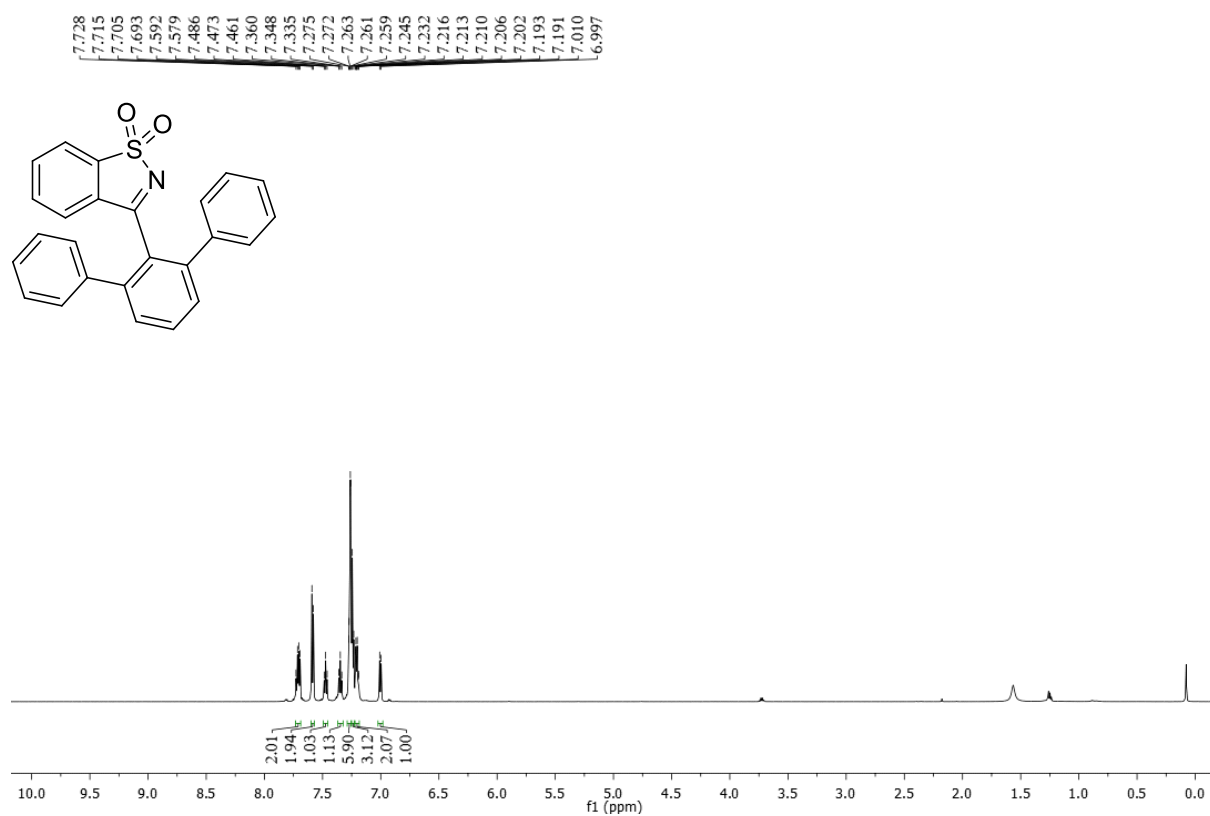

$^{13}\text{C}$  NMR of **3da** (150 MHz,  $\text{CDCl}_3$ ):

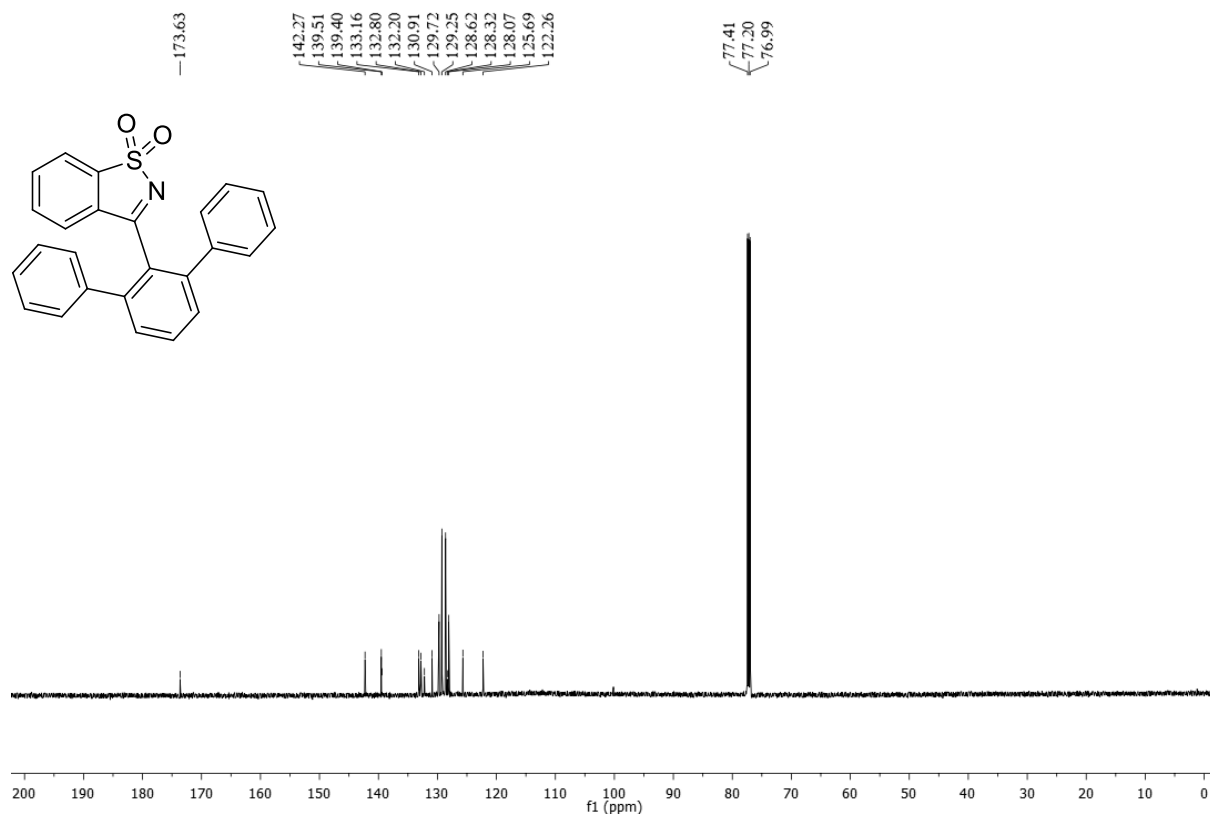

$^1\text{H}$  NMR of **3ea** (400MHz,  $\text{CDCl}_3$ ):

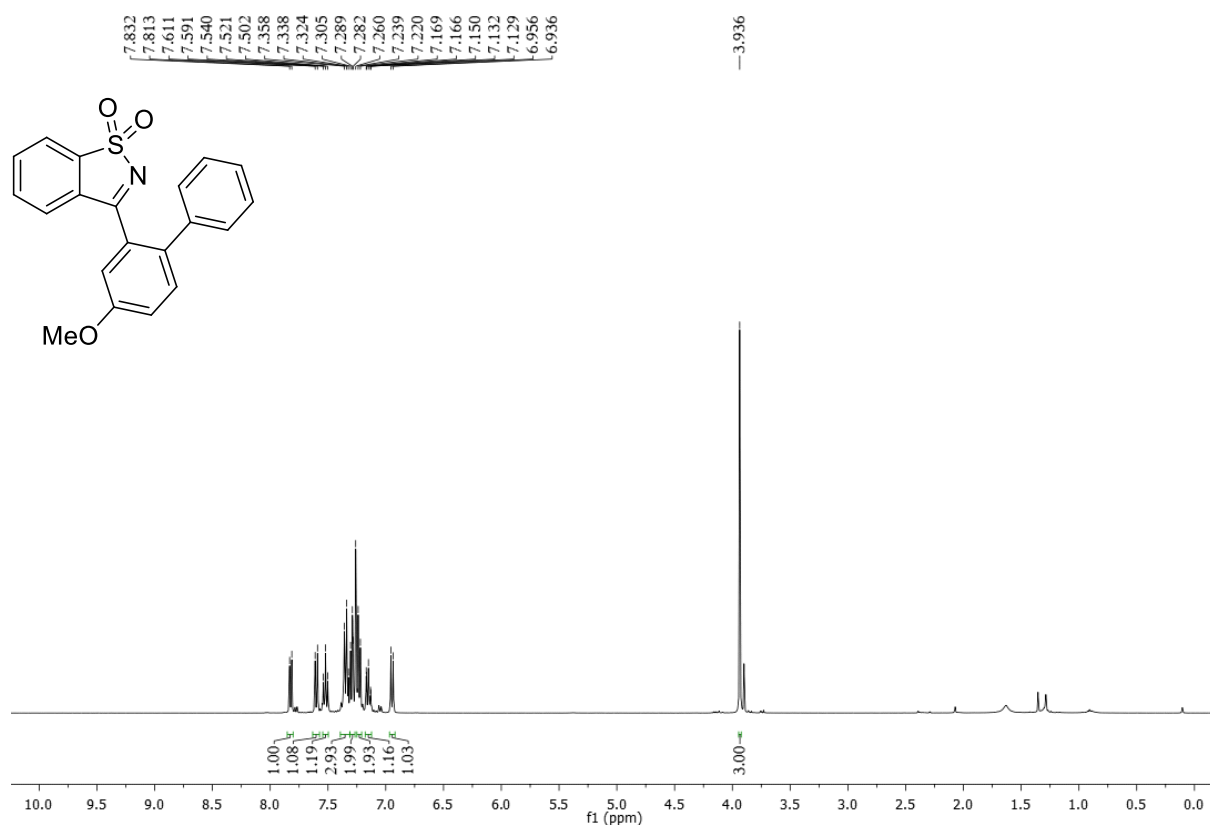

$^{13}\text{C}$  NMR of **3ea** (100MHz,  $\text{CDCl}_3$ ):

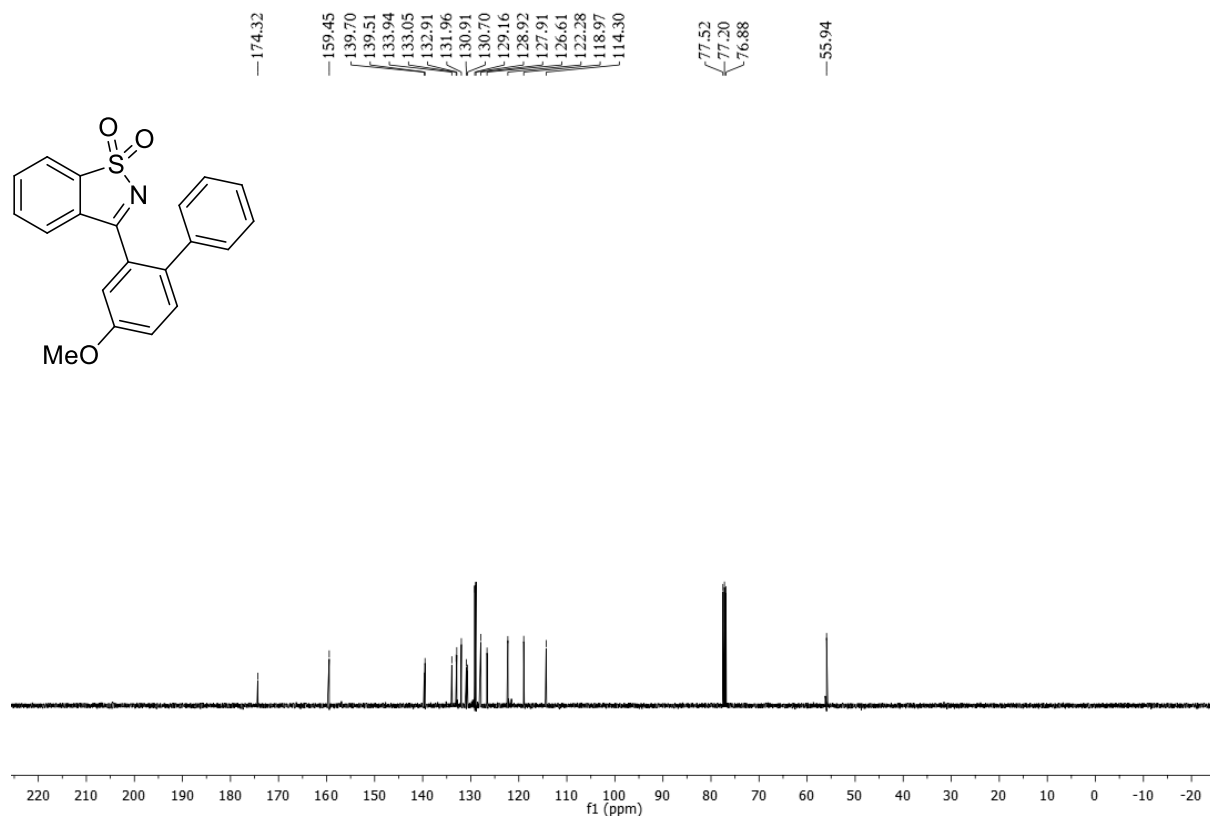

$^1\text{H}$  NMR of **3fa** (400MHz,  $\text{CDCl}_3$ ):

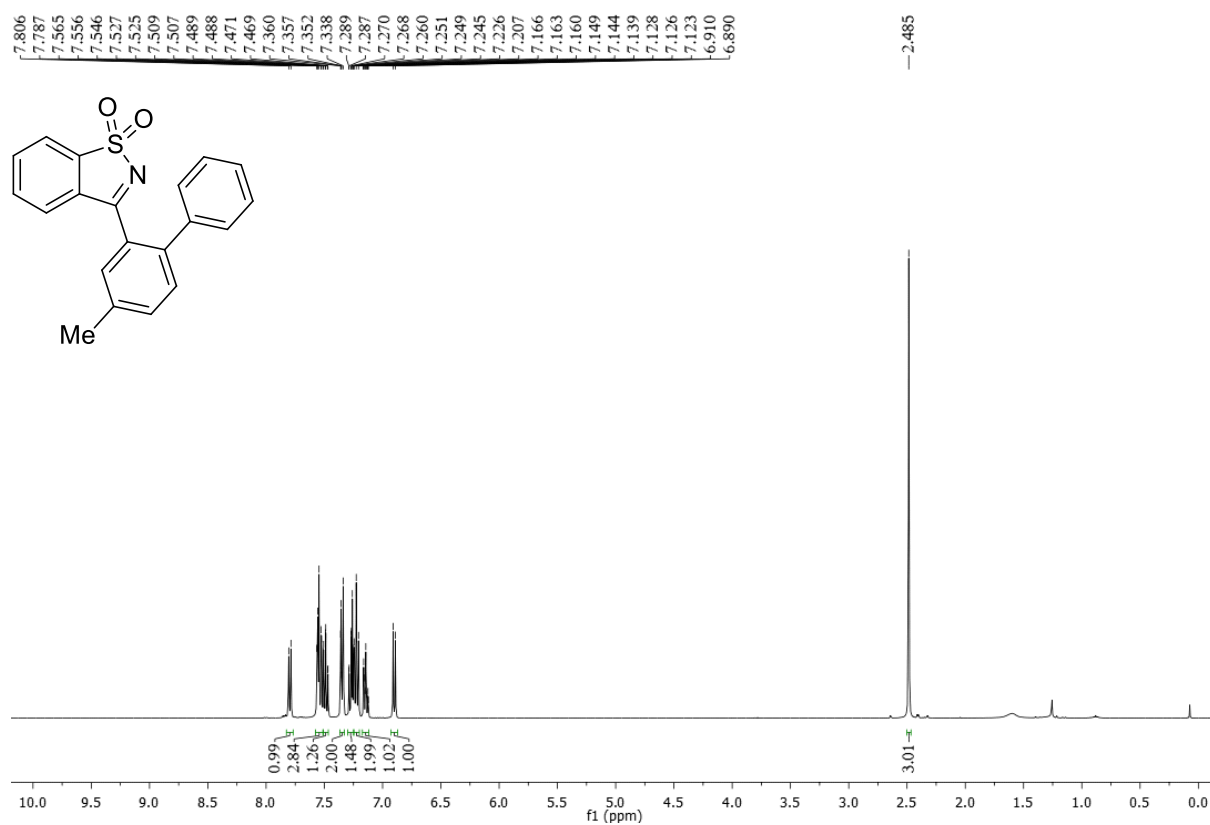

$^{13}\text{C}$  NMR of **3fa** (100MHz,  $\text{CDCl}_3$ ):

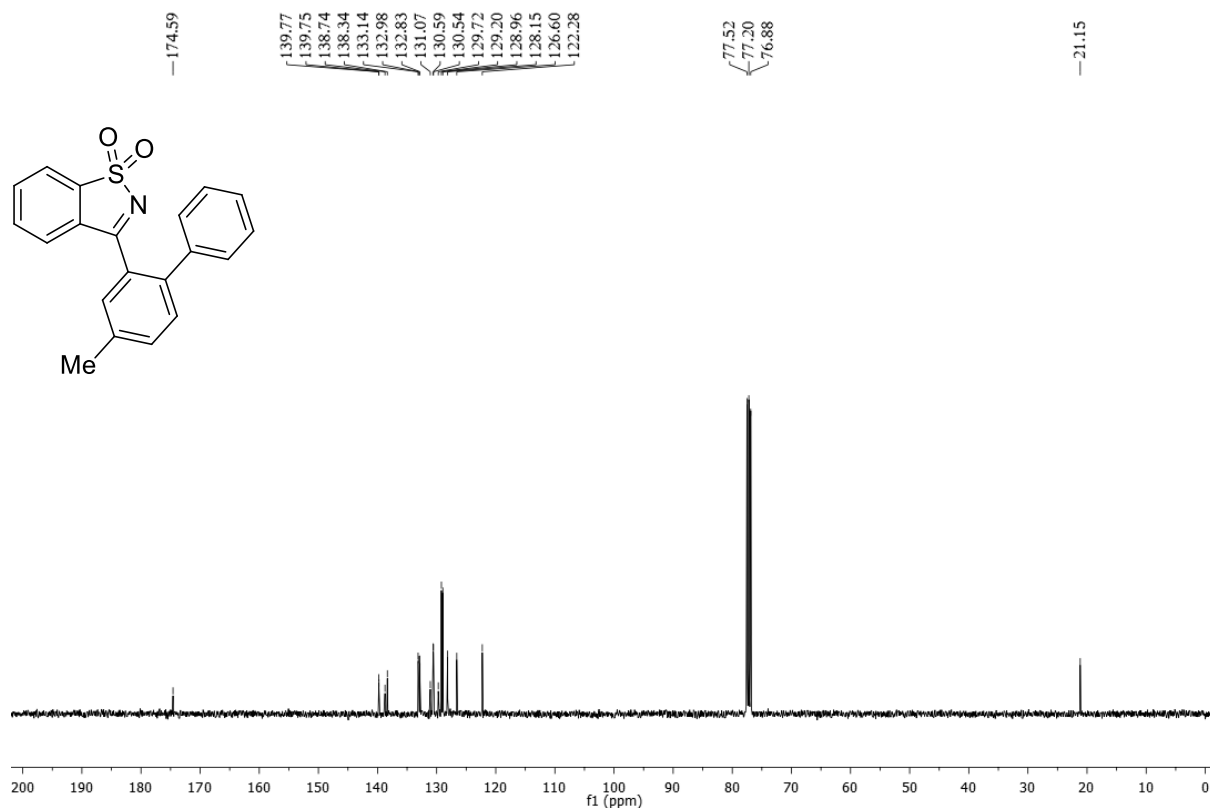

$^1\text{H}$  NMR of **3ga** (400MHz,  $\text{CDCl}_3$ ):

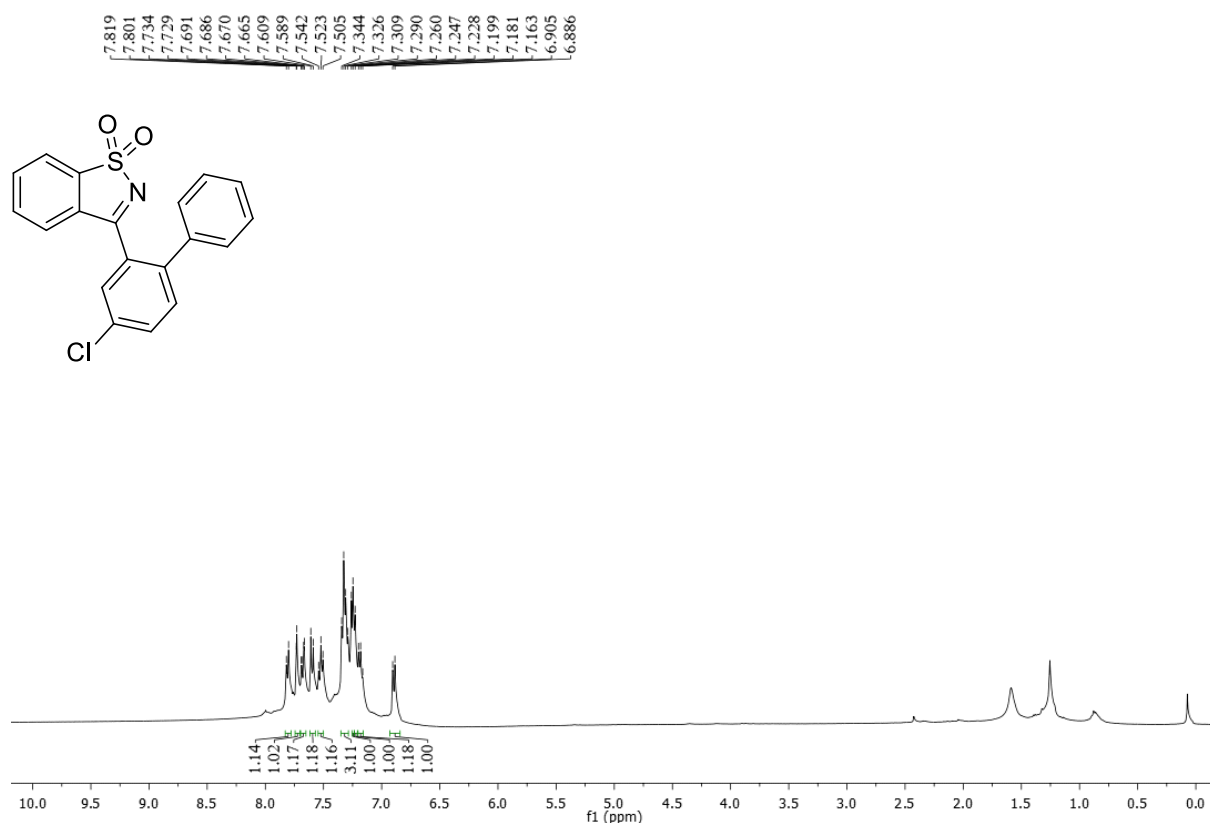

$^{13}\text{C}$  NMR of **3ga** (100MHz,  $\text{CDCl}_3$ ):

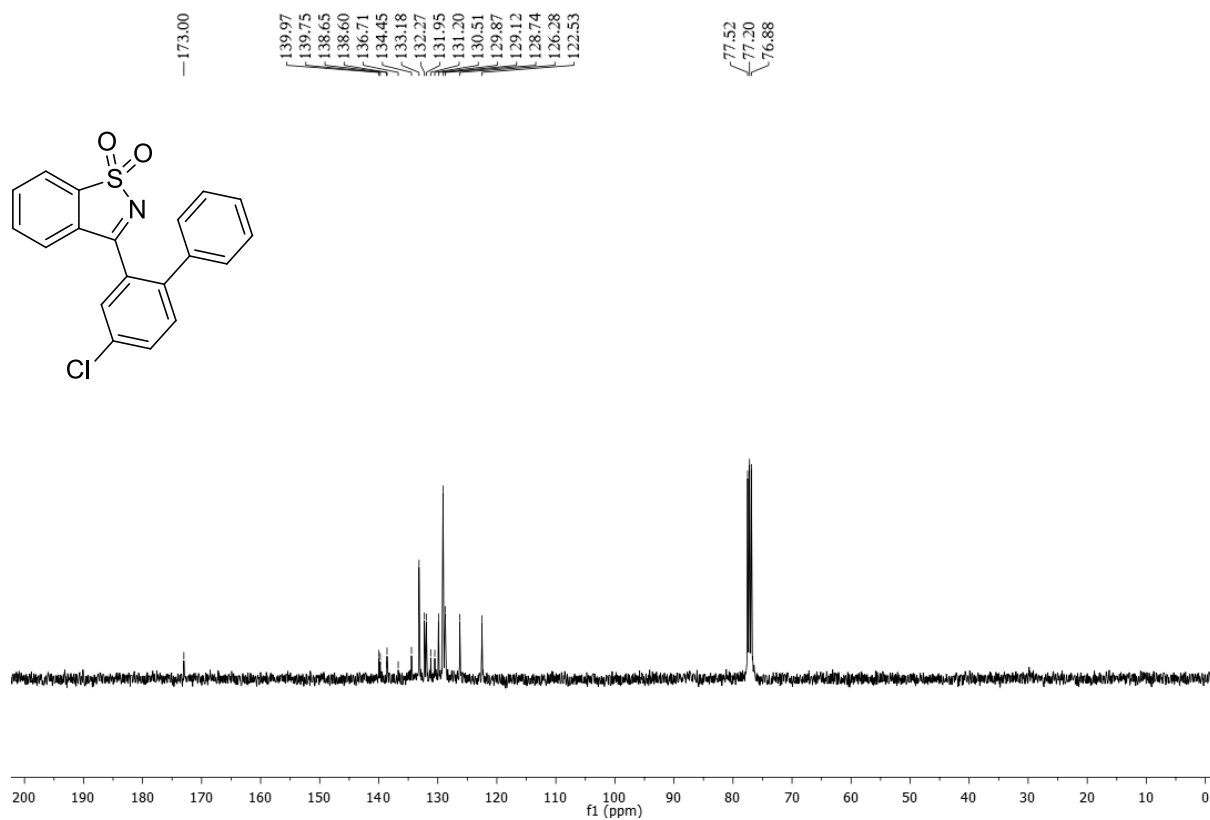

$^1\text{H}$  NMR of **3ha** (600MHz,  $\text{CDCl}_3$ ):

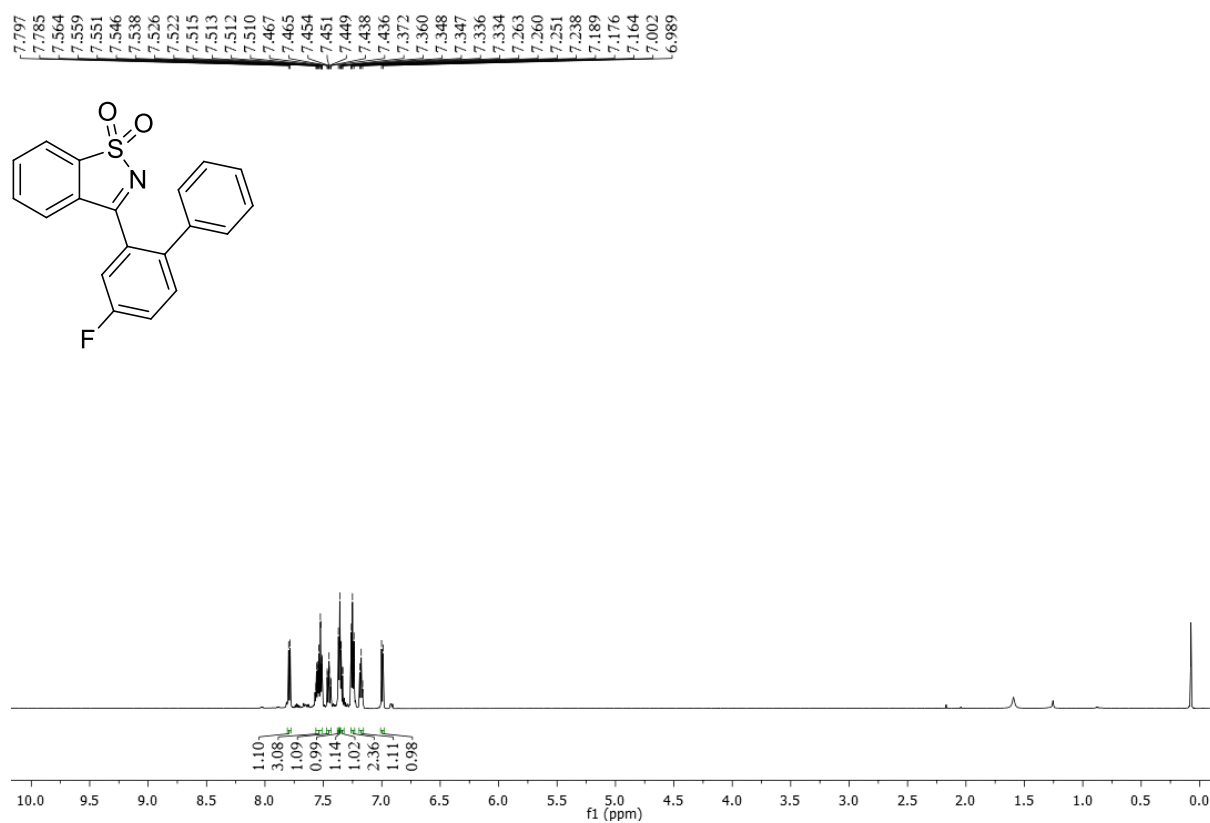

$^{13}\text{C}$  NMR of **3ha** (150 MHz,  $\text{CDCl}_3$ ):

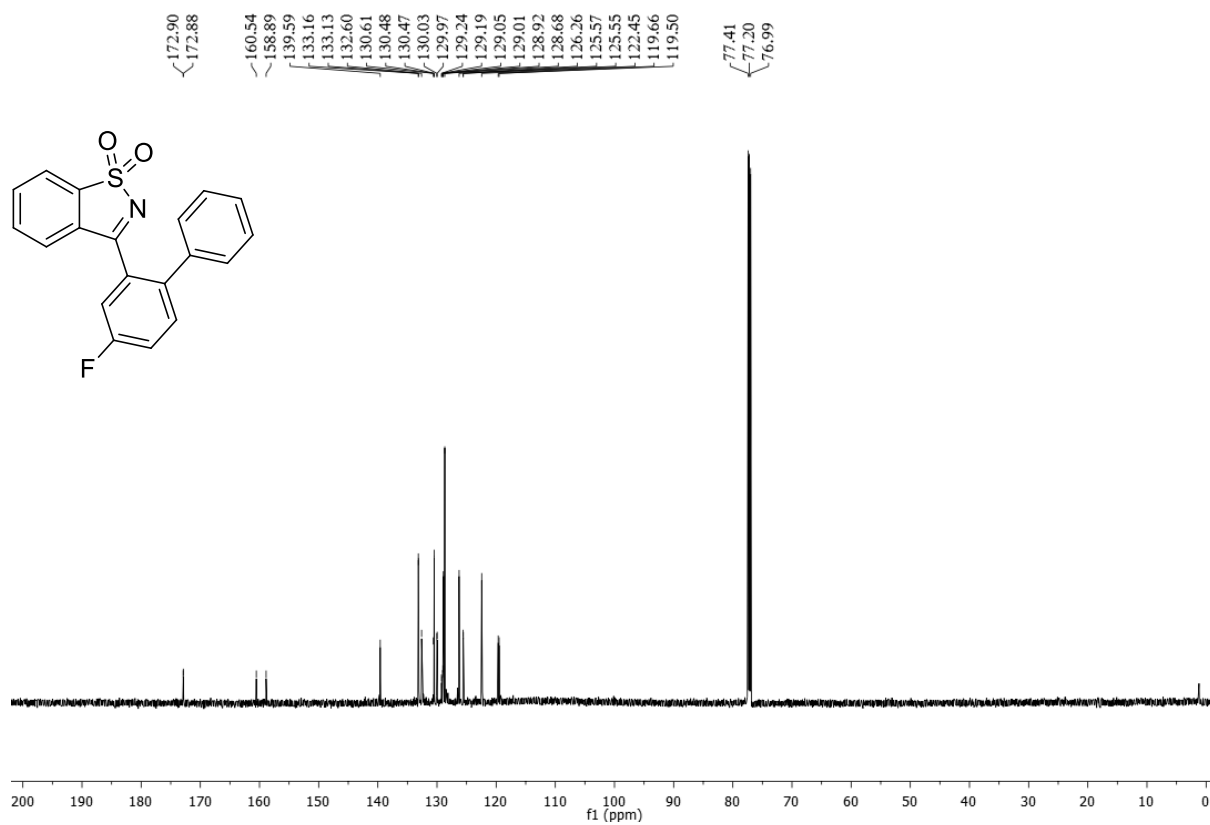

$^1\text{H}$  NMR of **3ia** (400MHz,  $\text{CDCl}_3$ ):

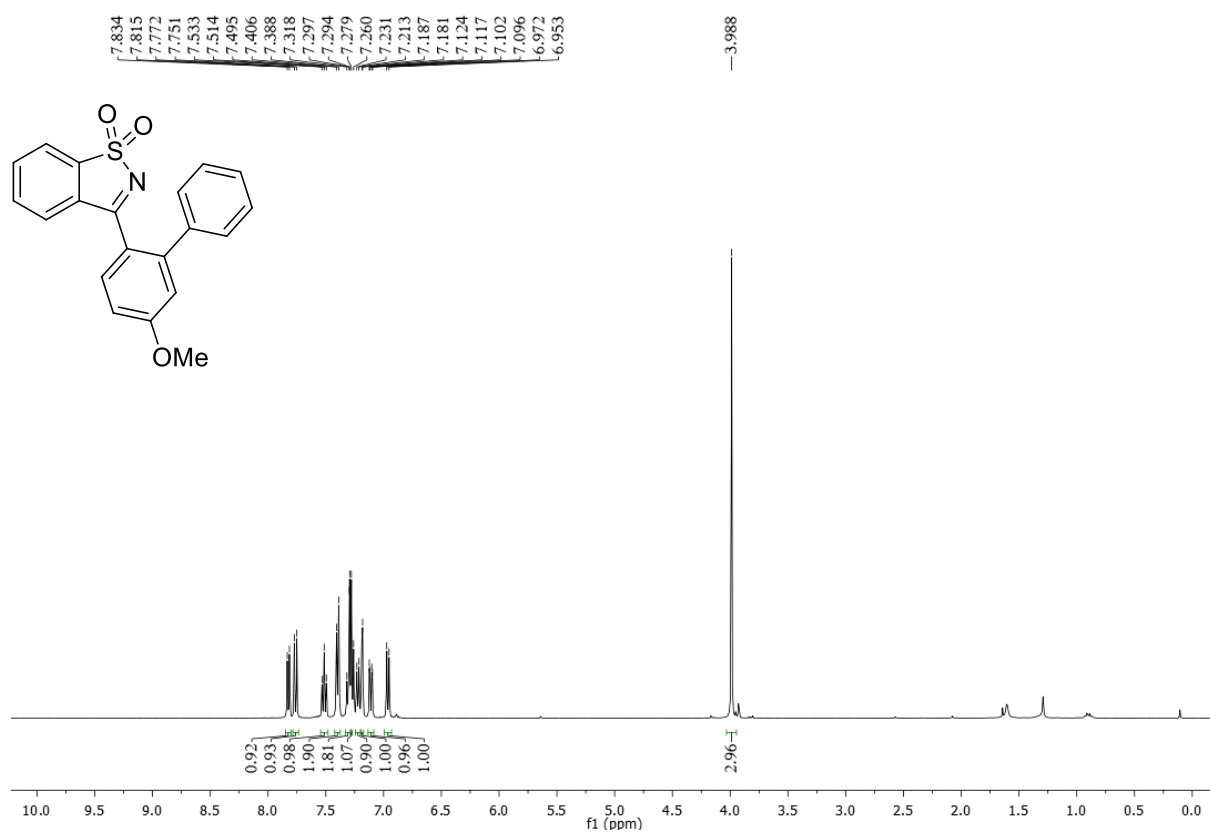

$^{13}\text{C}$  NMR of **3ia** (100MHz,  $\text{CDCl}_3$ ):

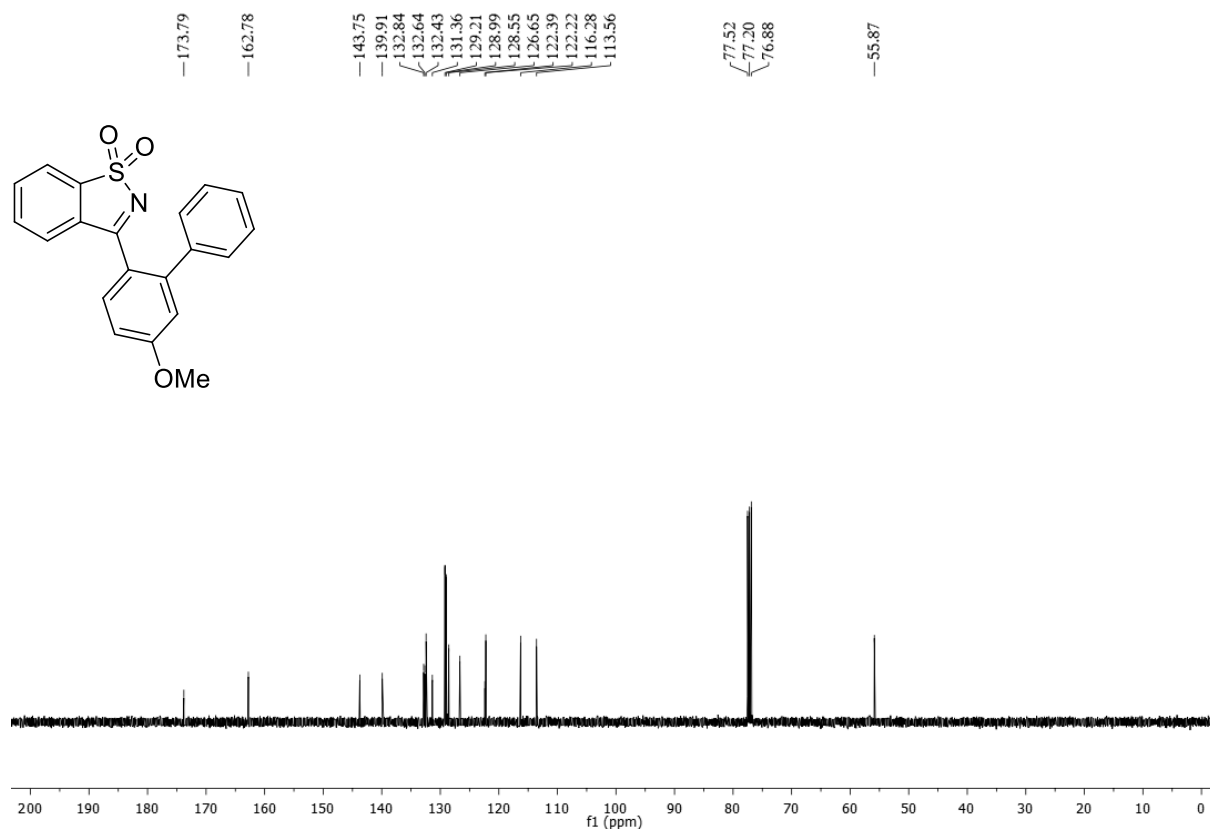

$^1\text{H}$  NMR of **3ja** (400MHz,  $\text{CDCl}_3$ ):

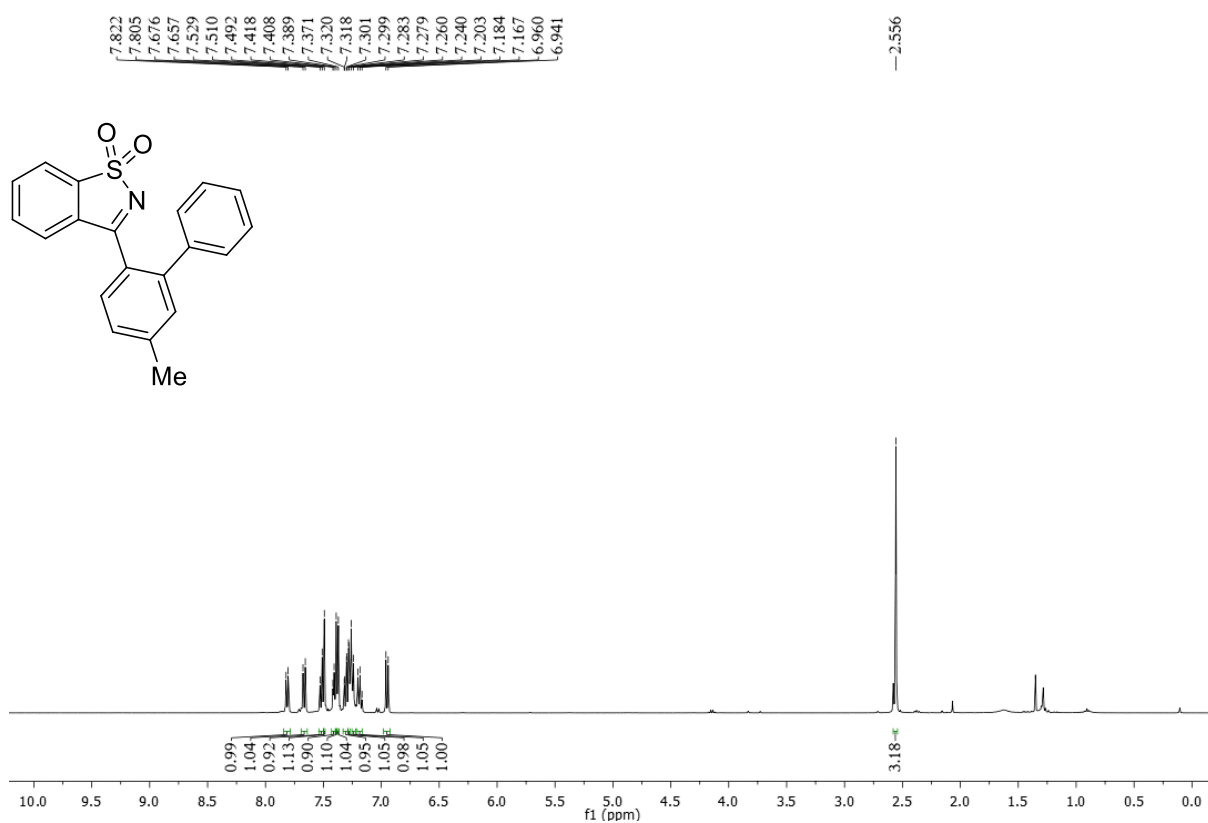

$^{13}\text{C}$  NMR of **3ja** (100MHz,  $\text{CDCl}_3$ ):

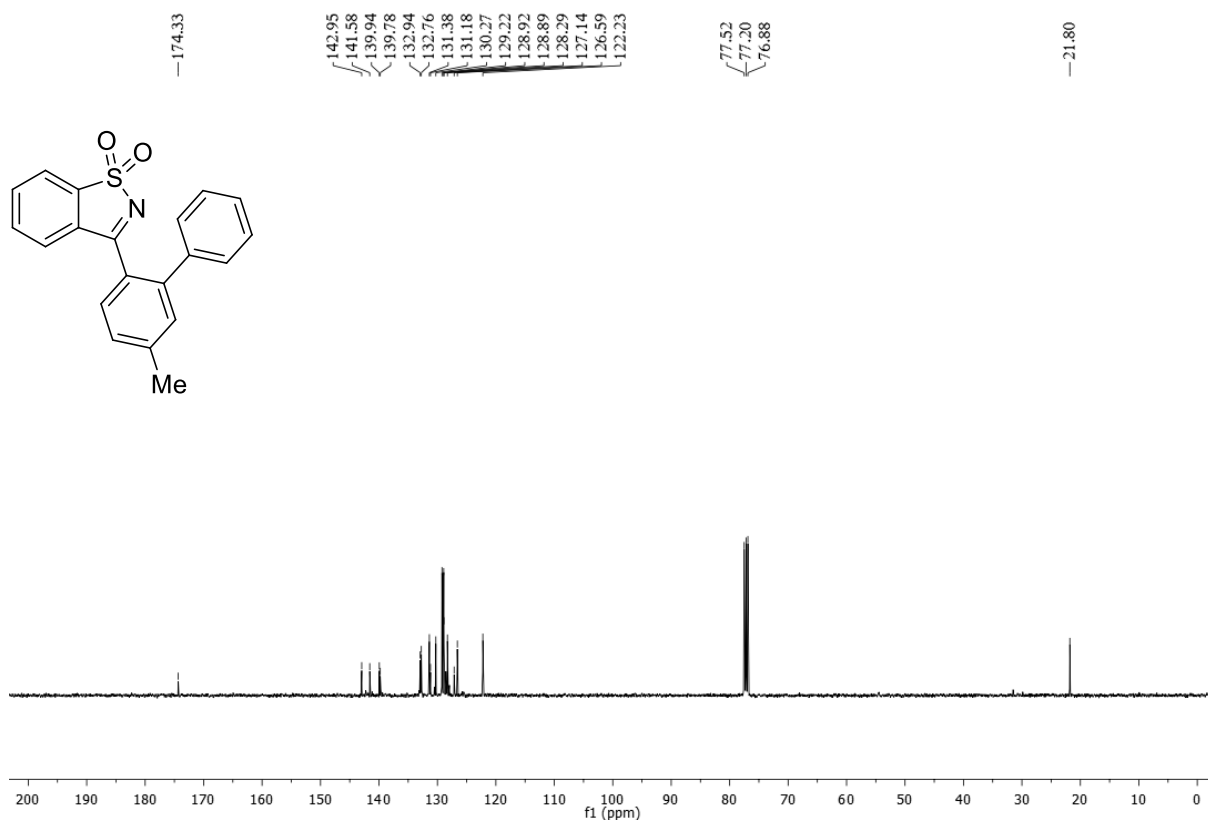

$^1\text{H}$  NMR of **3ka** (400MHz,  $\text{CDCl}_3$ ):

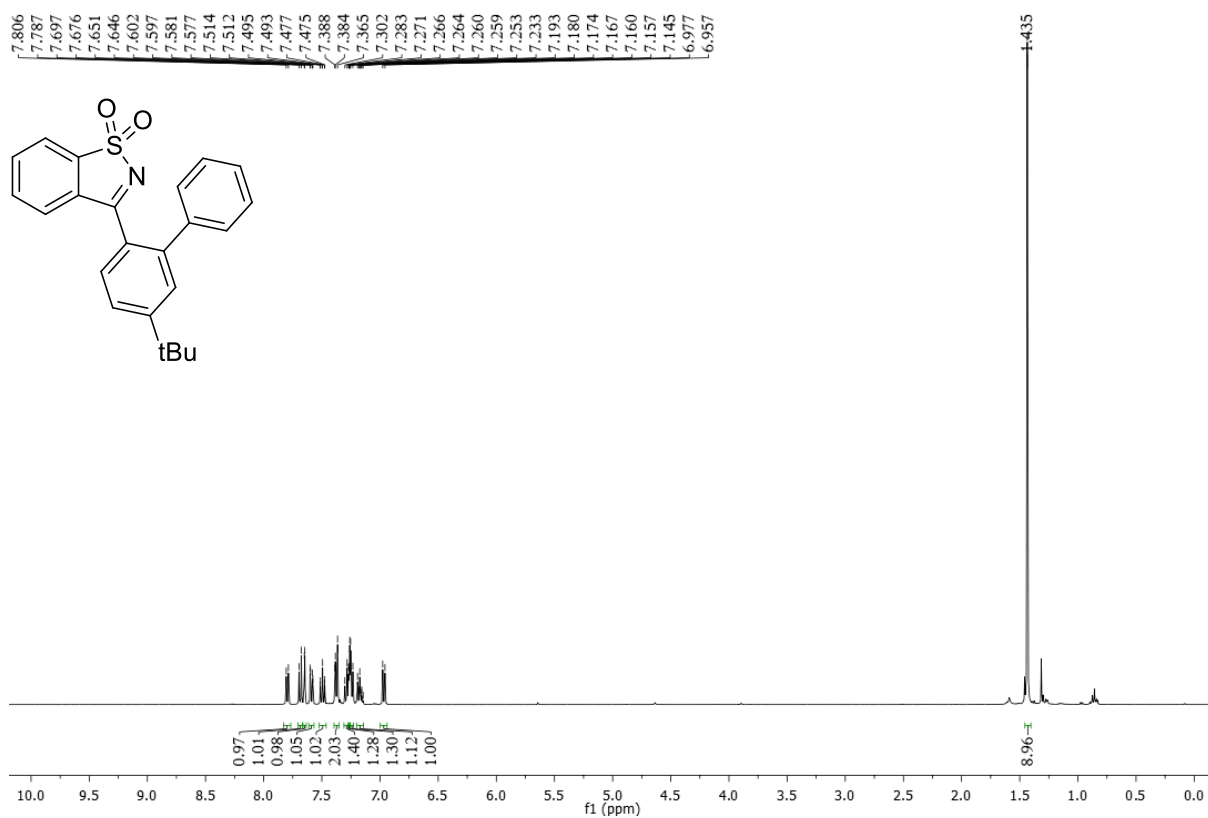

$^{13}\text{C}$  NMR of **3ka** (100MHz,  $\text{CDCl}_3$ ):

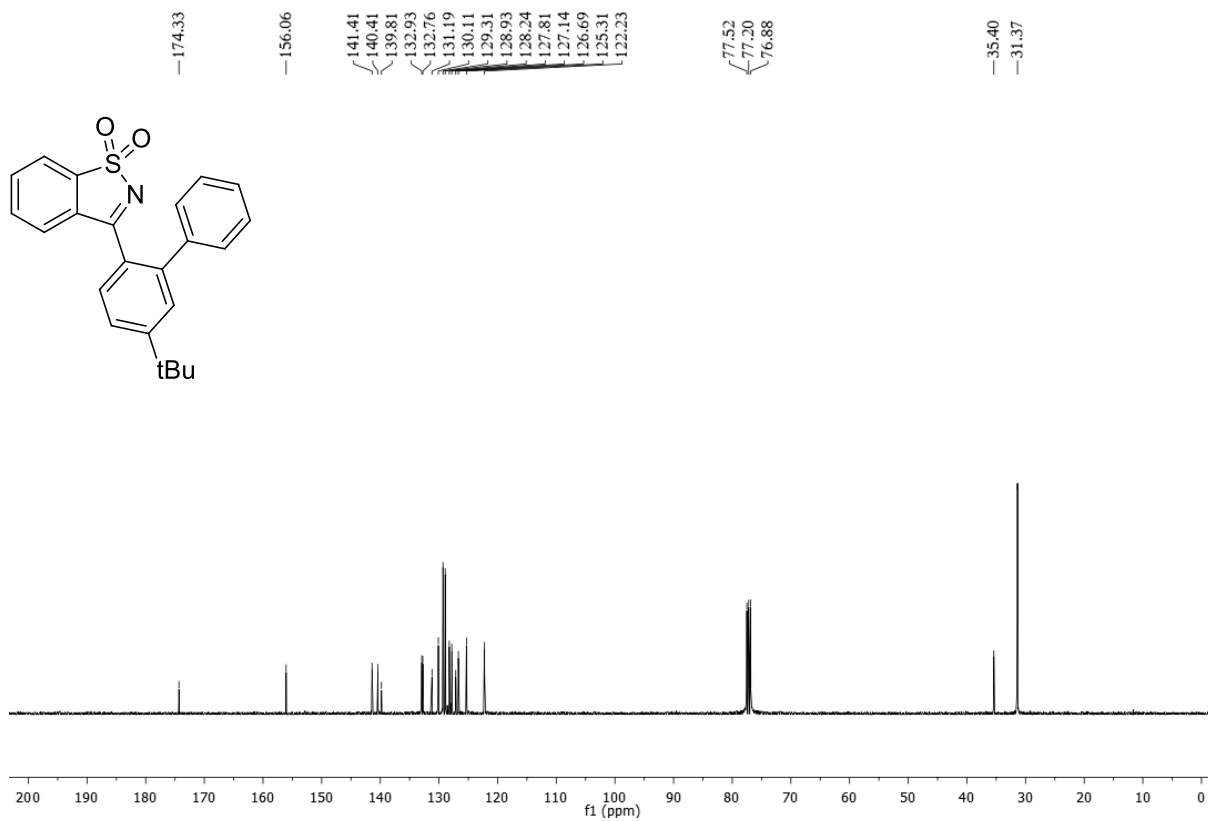

$^1\text{H}$  NMR of **3la** (600MHz,  $\text{CDCl}_3$ ):

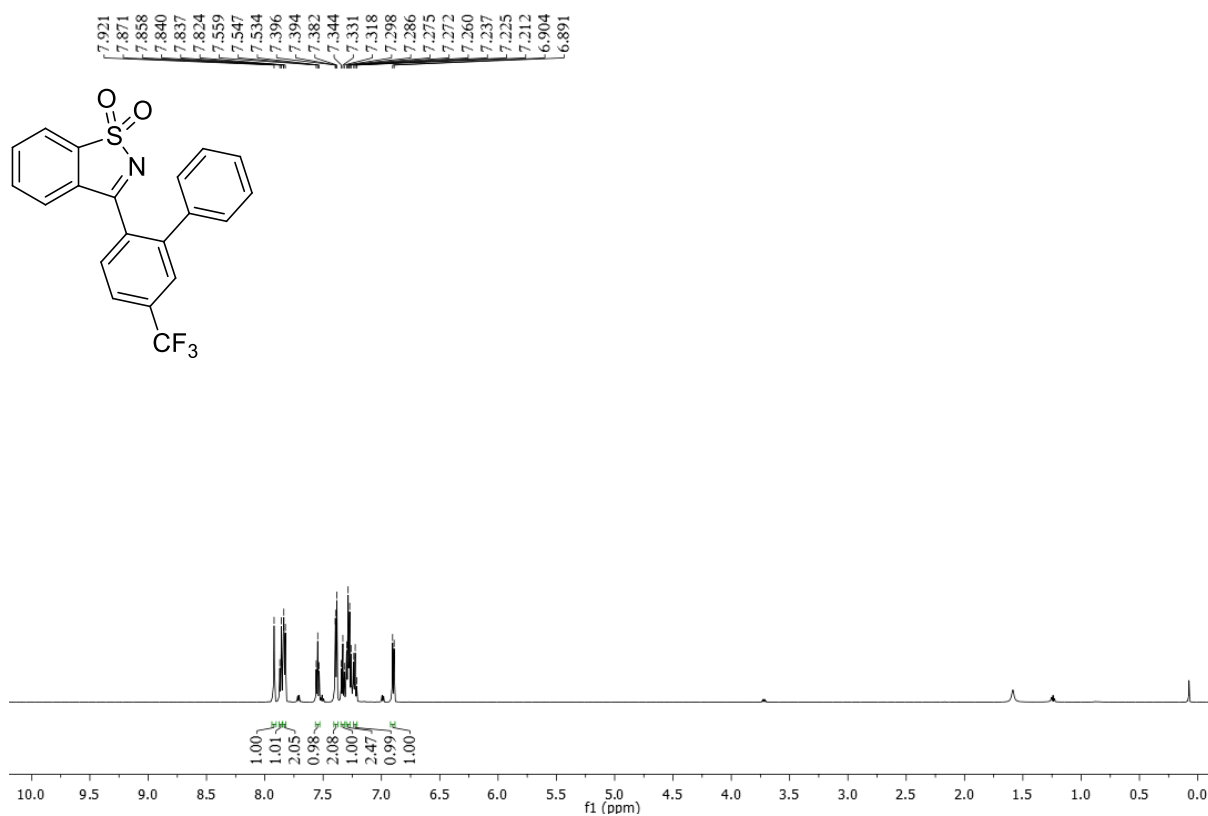

$^{13}\text{C}$  NMR of **3la** (150MHz,  $\text{CDCl}_3$ ):

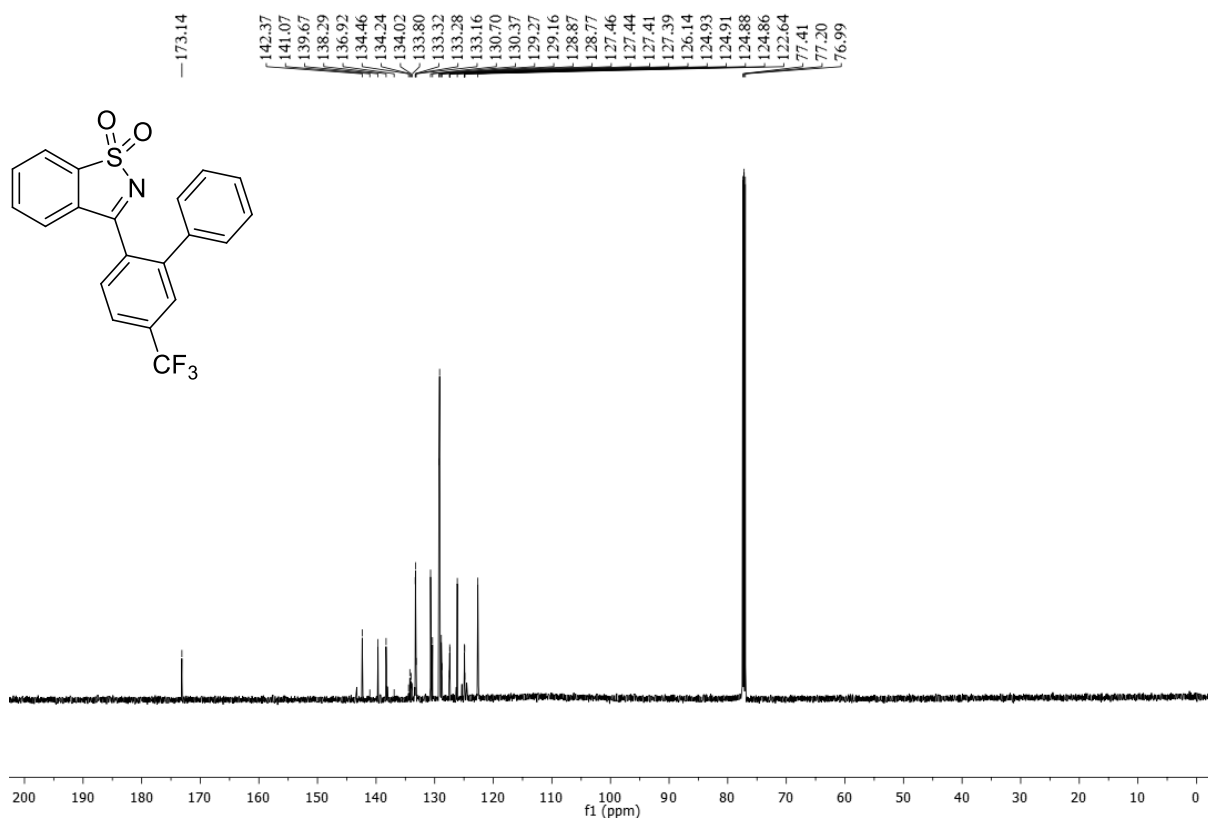

$^1\text{H}$  NMR of **3ma** (600MHz,  $\text{CDCl}_3$ ):

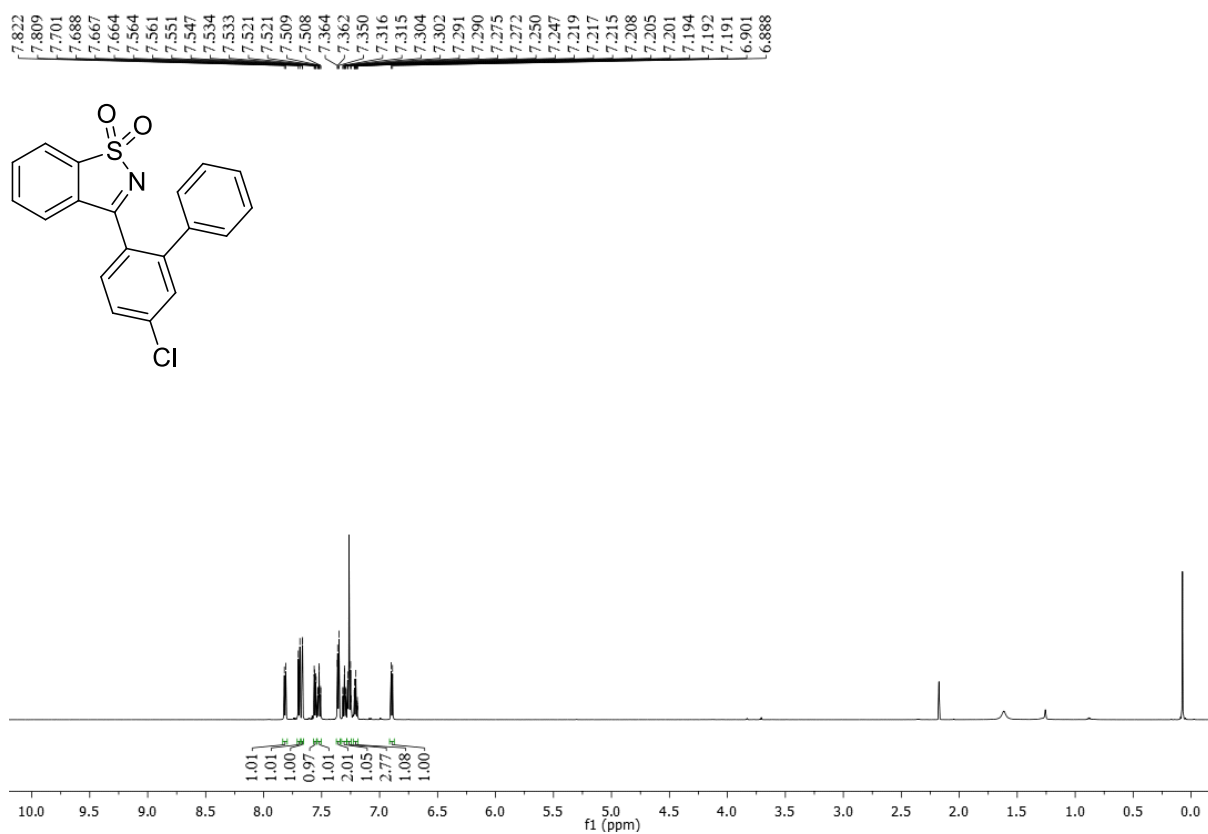

$^{13}\text{C}$  NMR of **3ma** (150MHz,  $\text{CDCl}_3$ ):

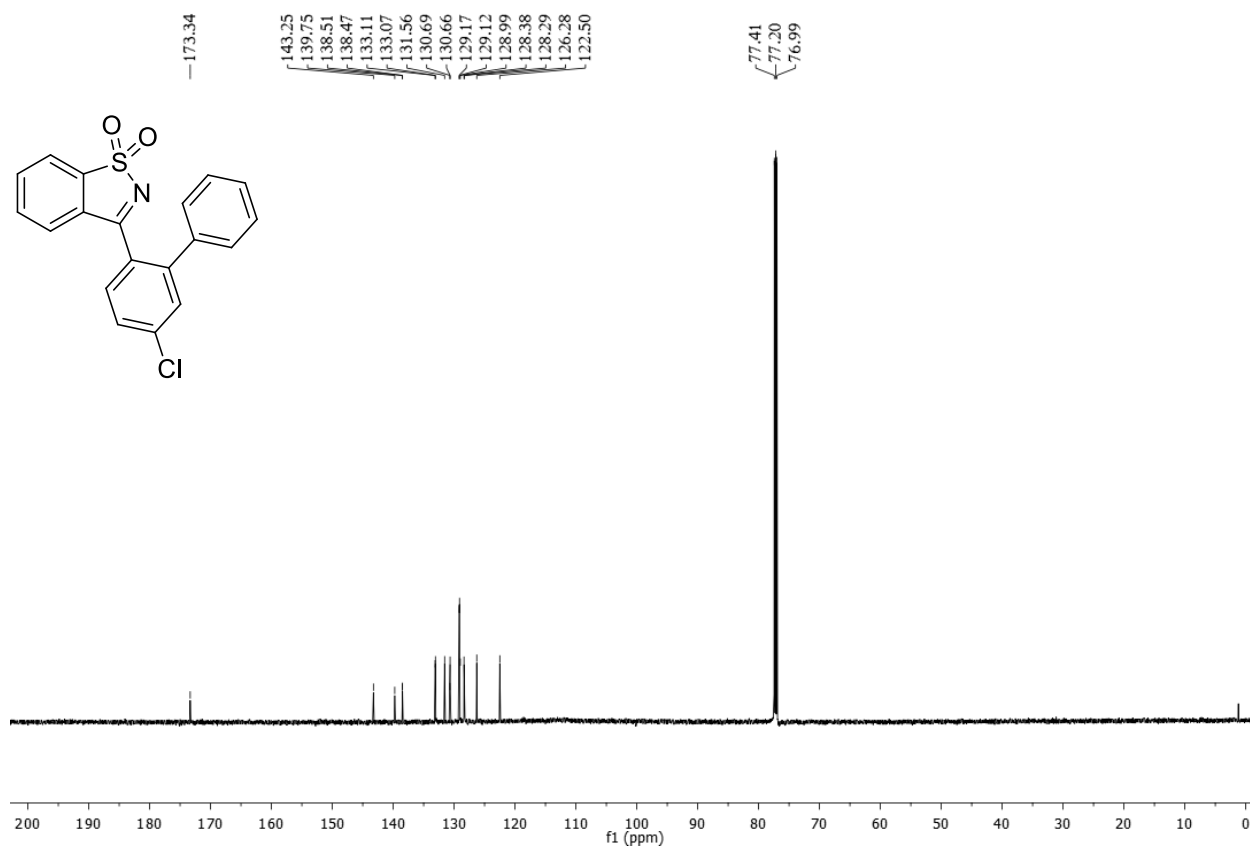

$^1\text{H}$  NMR of **3na** (400MHz,  $\text{CDCl}_3$ ):

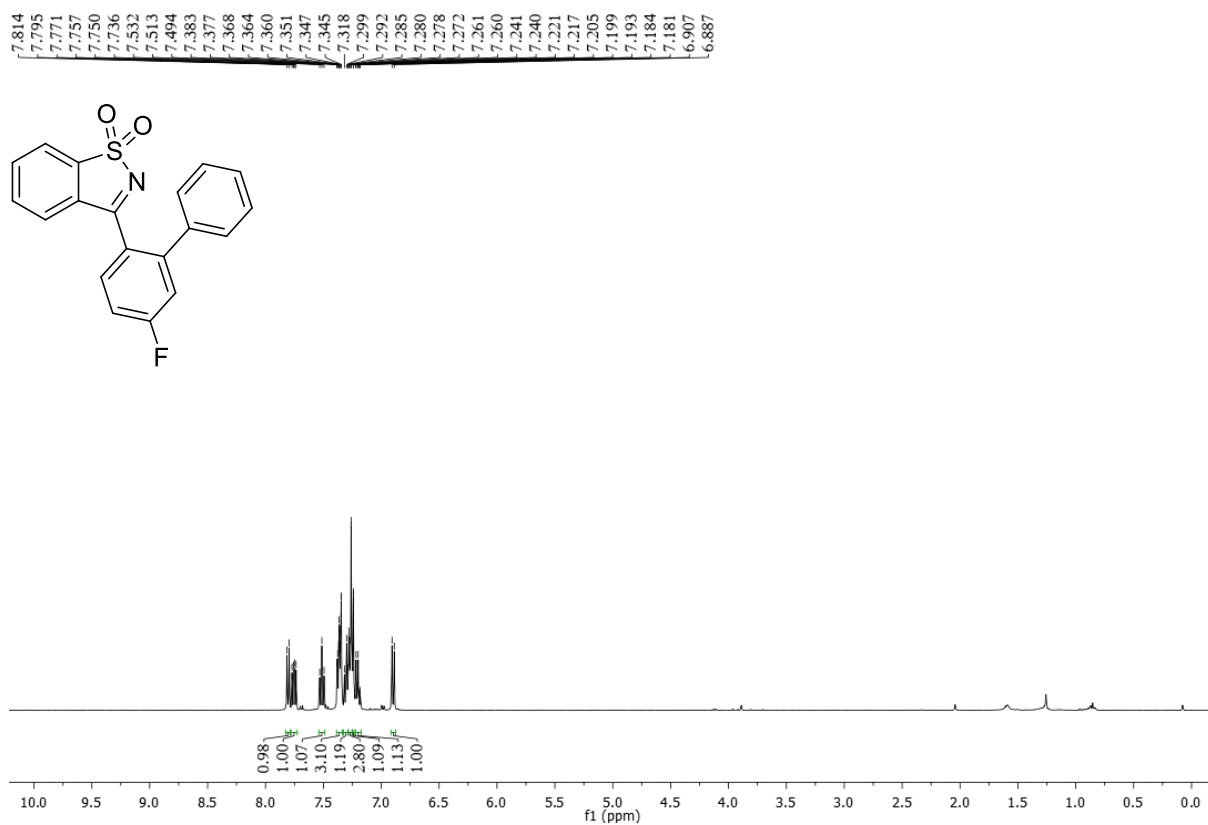

$^{13}\text{C}$  NMR of **3na** (600MHz,  $\text{CDCl}_3$ ):

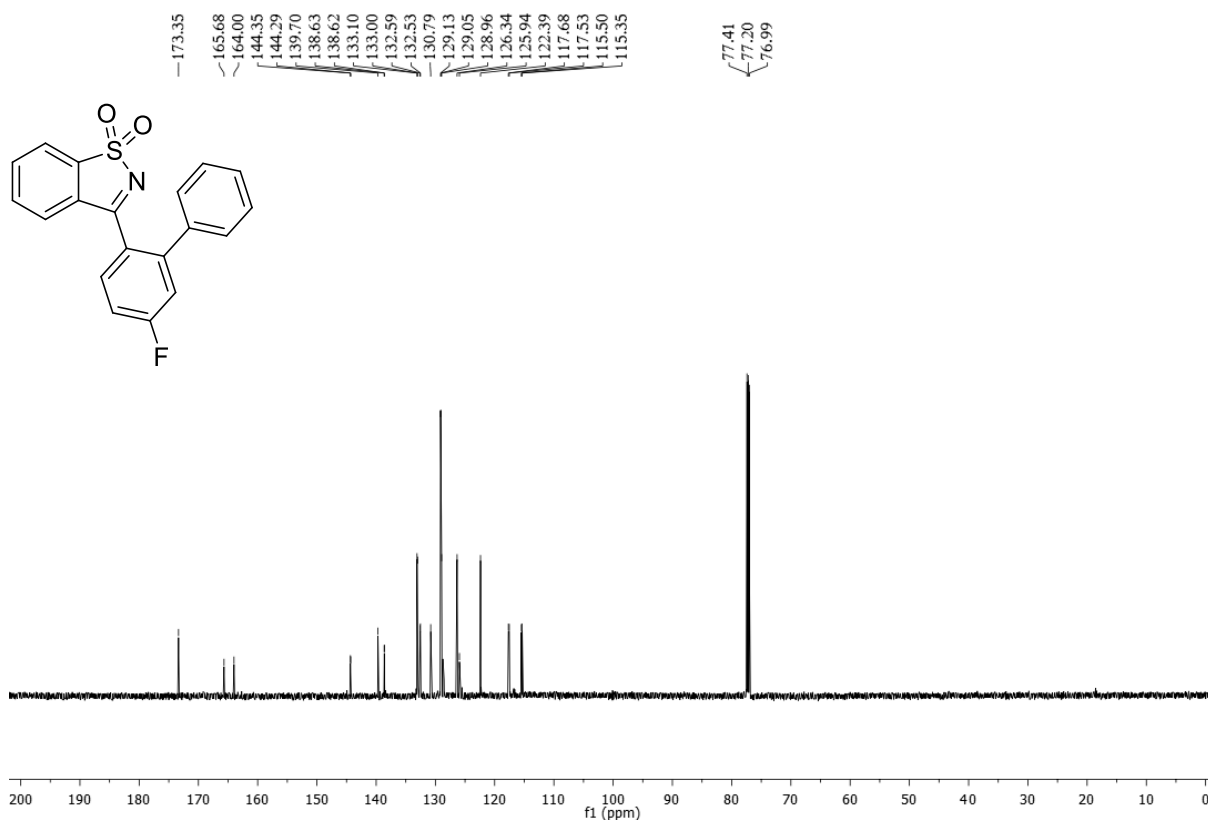

$^1\text{H}$  NMR of **3oa** (400MHz,  $\text{CDCl}_3$ ):

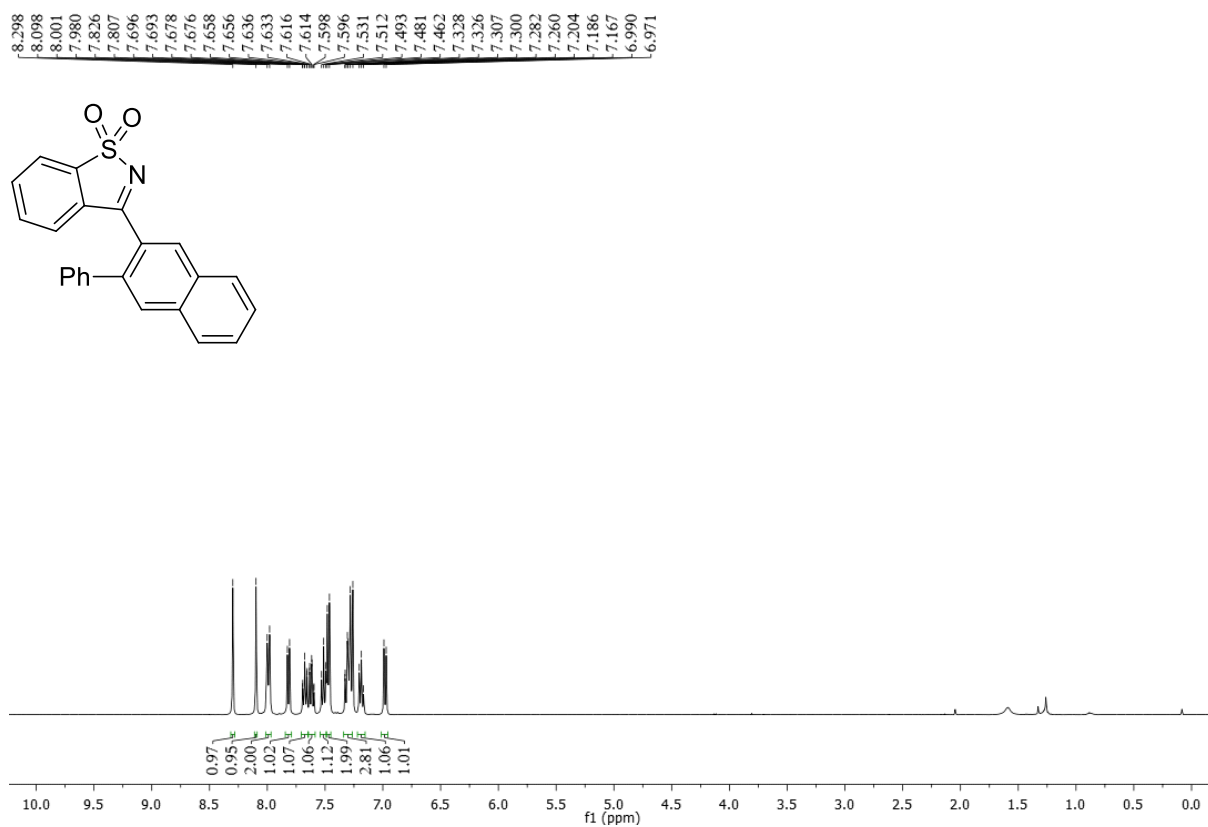

$^{13}\text{C}$  NMR of **3oa** (100MHz,  $\text{CDCl}_3$ ):

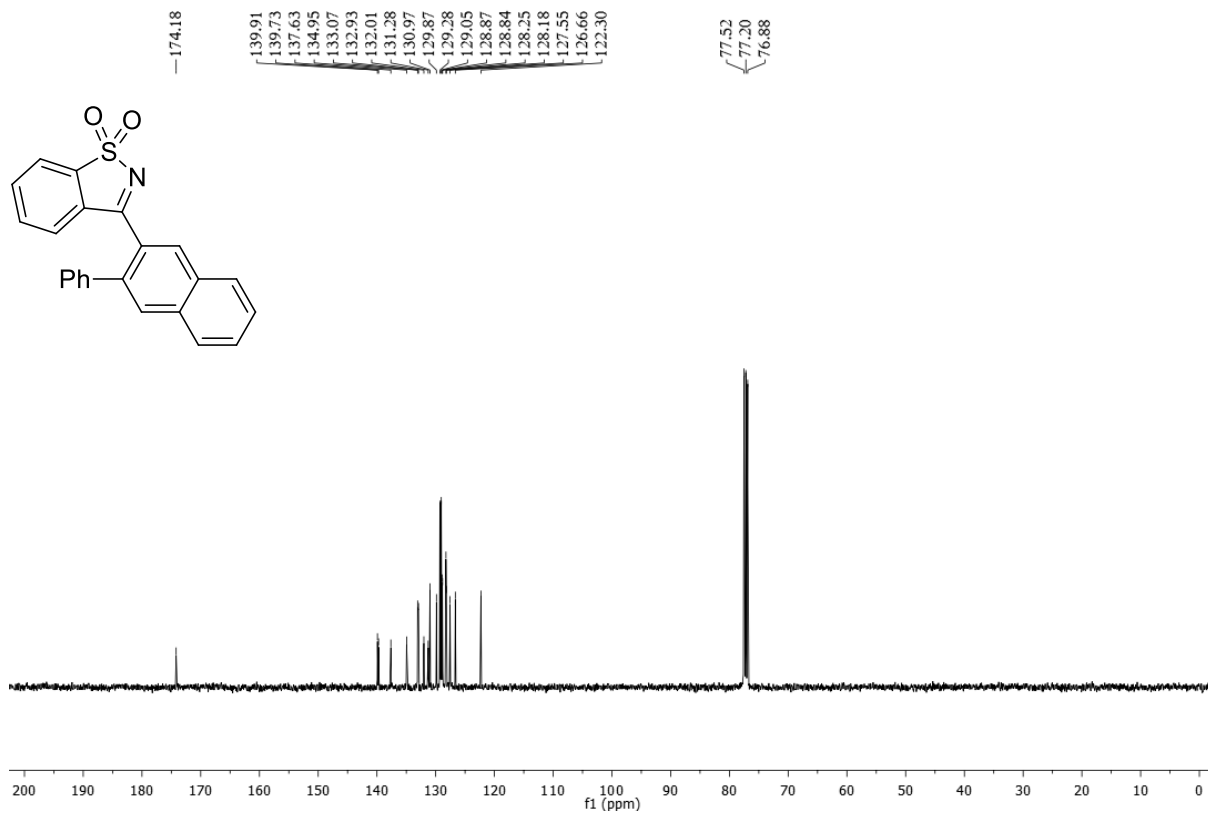

$^1\text{H}$  NMR of **3pa** (400MHz,  $\text{CDCl}_3$ ):

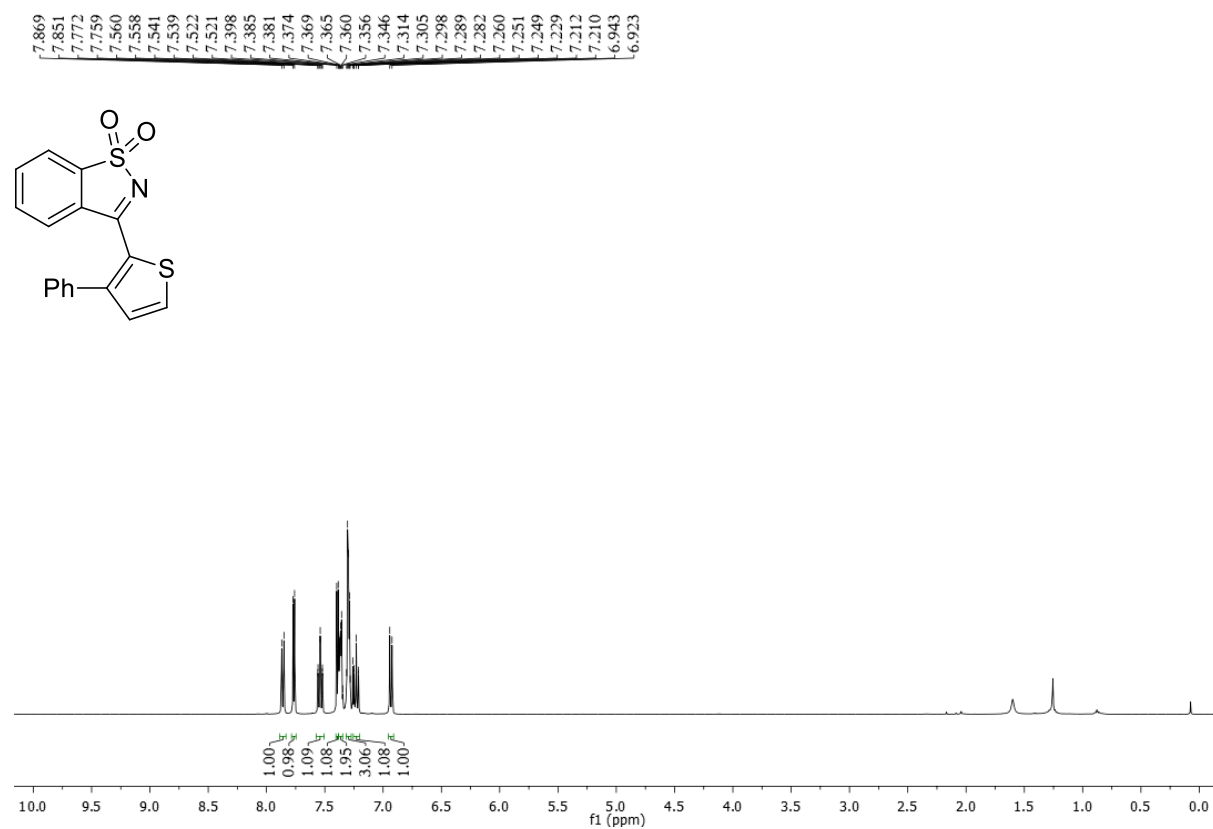

$^{13}\text{C}$  NMR of **3pa** (100MHz,  $\text{CDCl}_3$ ):

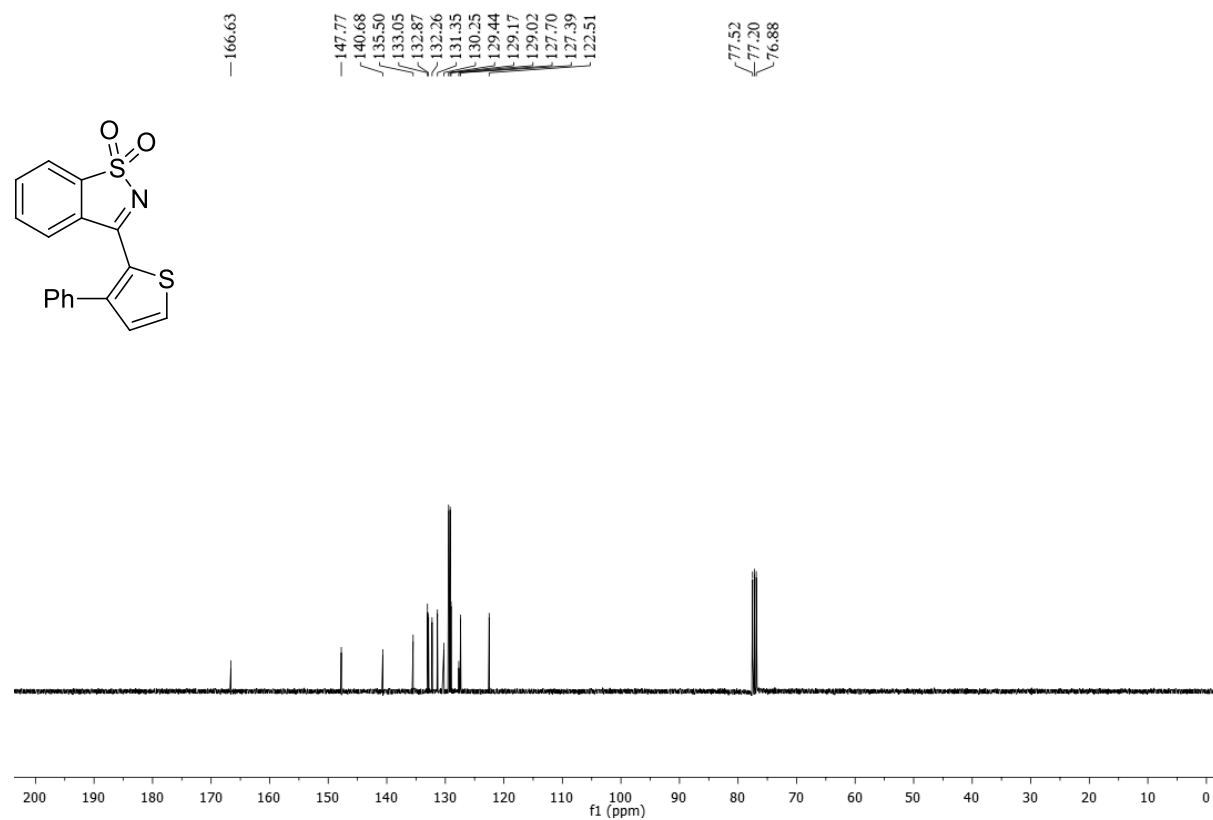

$^1\text{H}$  NMR of **3bb** (400MHz,  $\text{CDCl}_3$ ):

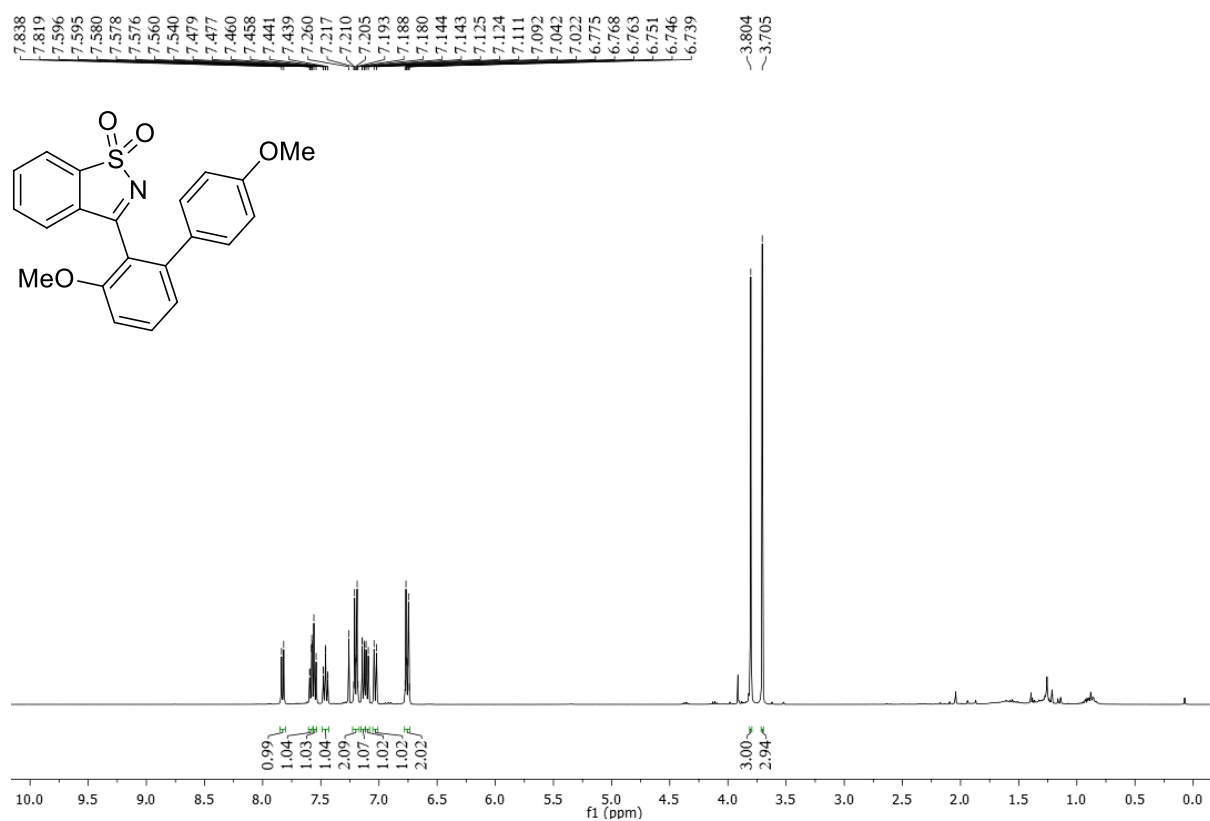

$^{13}\text{C}$  NMR of **3bb** (100MHz,  $\text{CDCl}_3$ ):

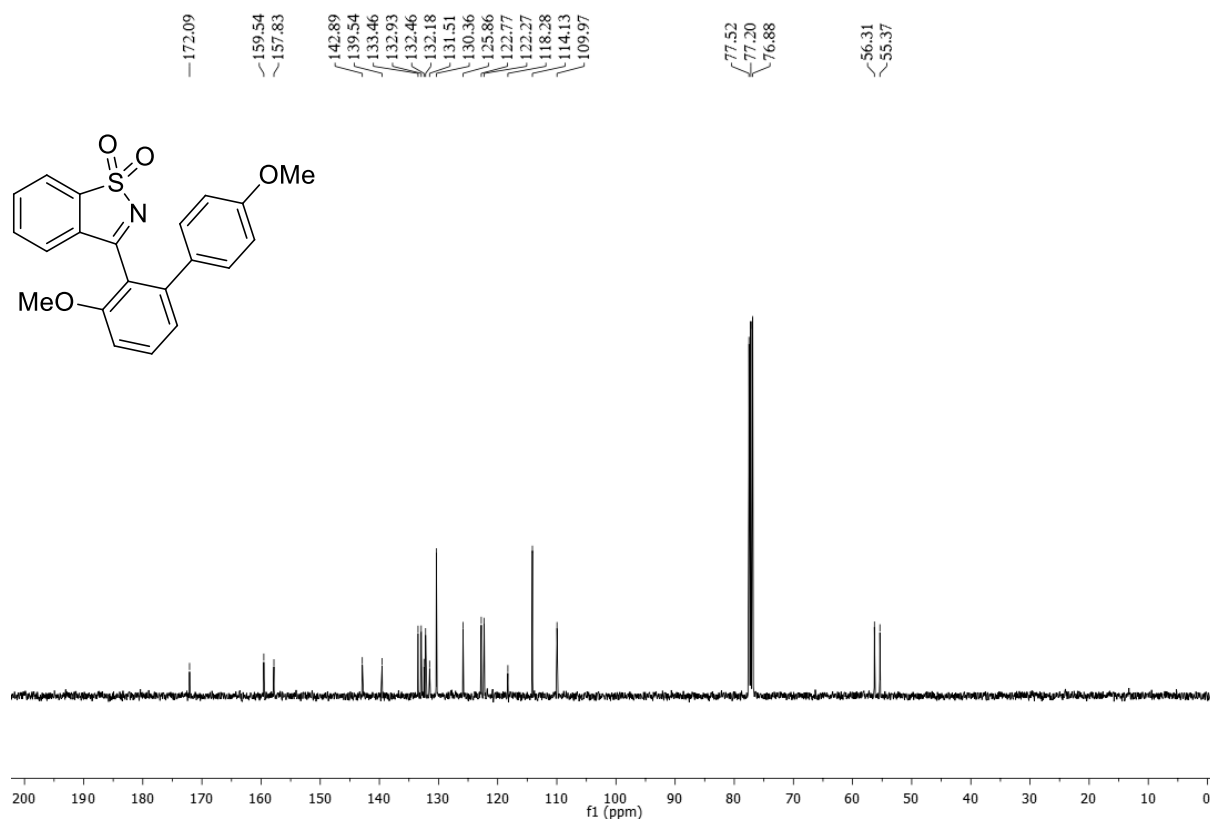

$^1\text{H}$  NMR of **3bc** (400MHz,  $\text{CDCl}_3$ ):

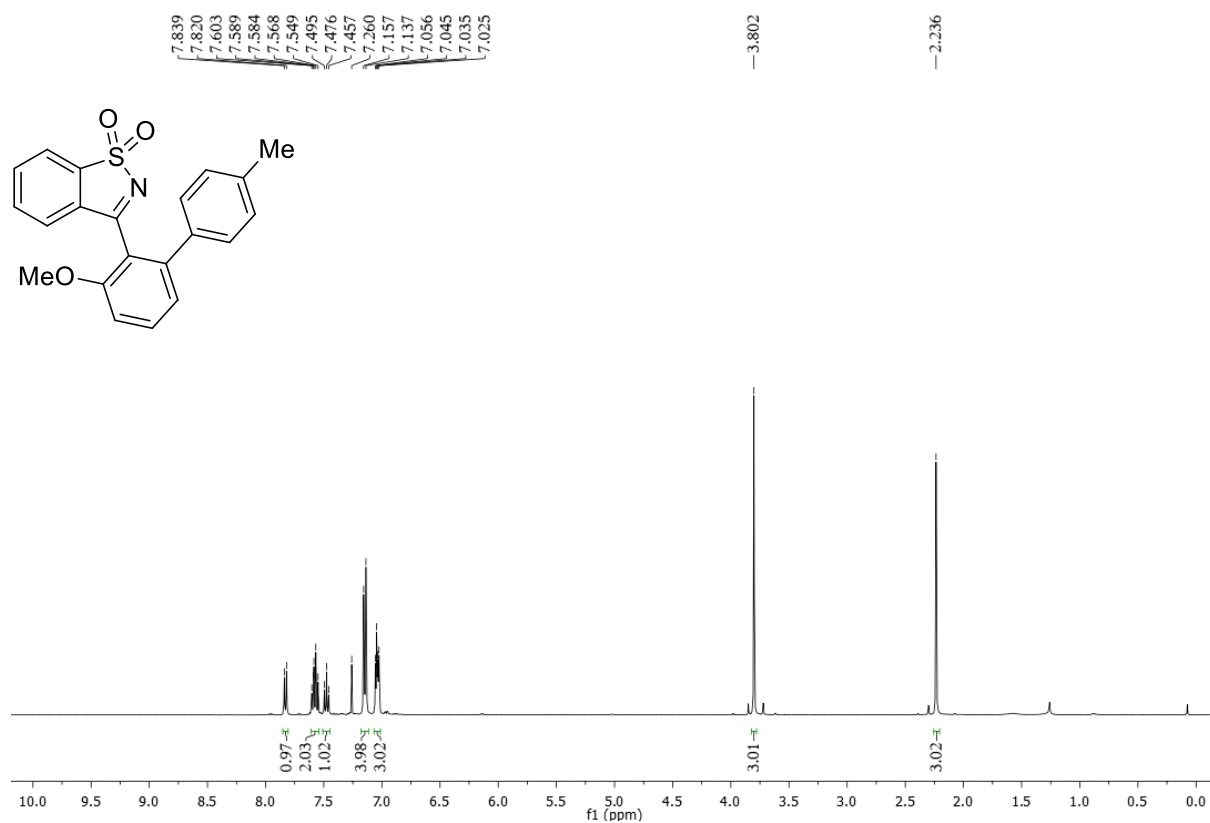

$^{13}\text{C}$  NMR of **3bc** (100MHz,  $\text{CDCl}_3$ ):

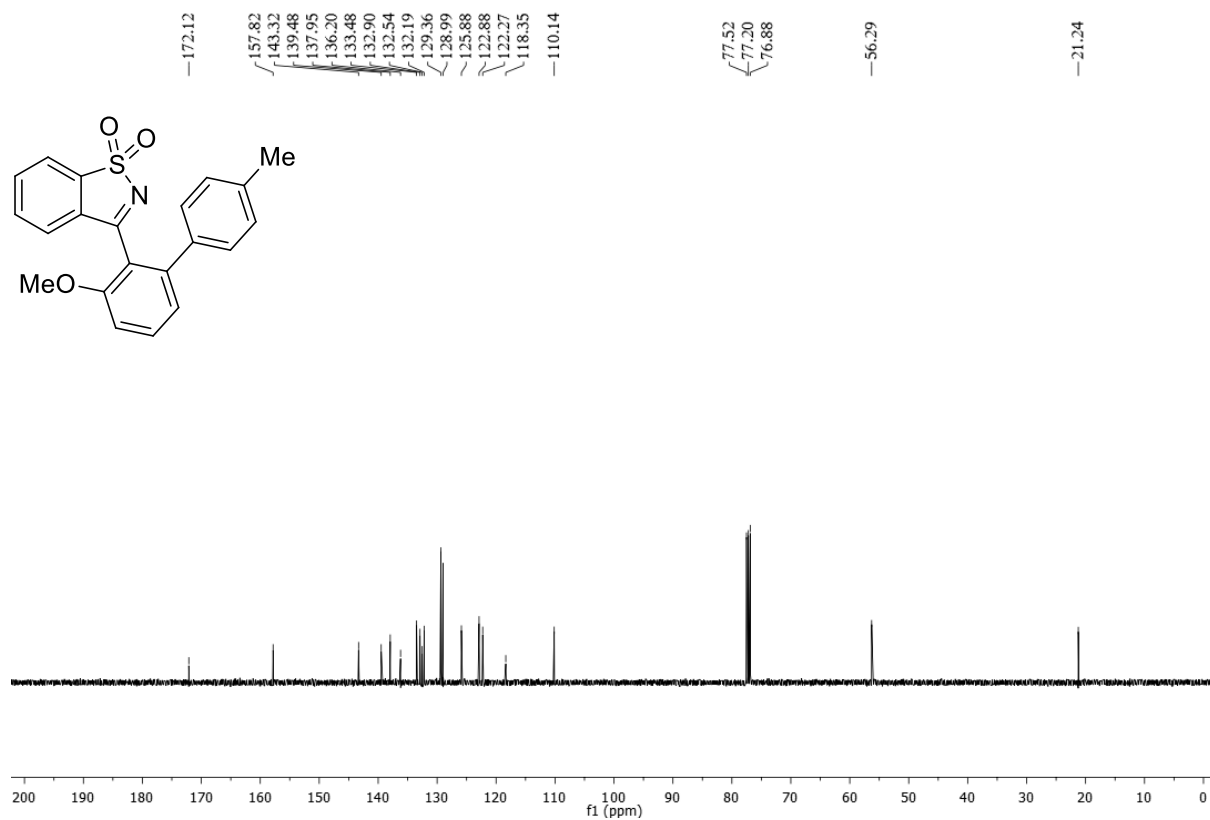

$^1\text{H}$  NMR of **3bd** (400MHz,  $\text{CDCl}_3$ ):

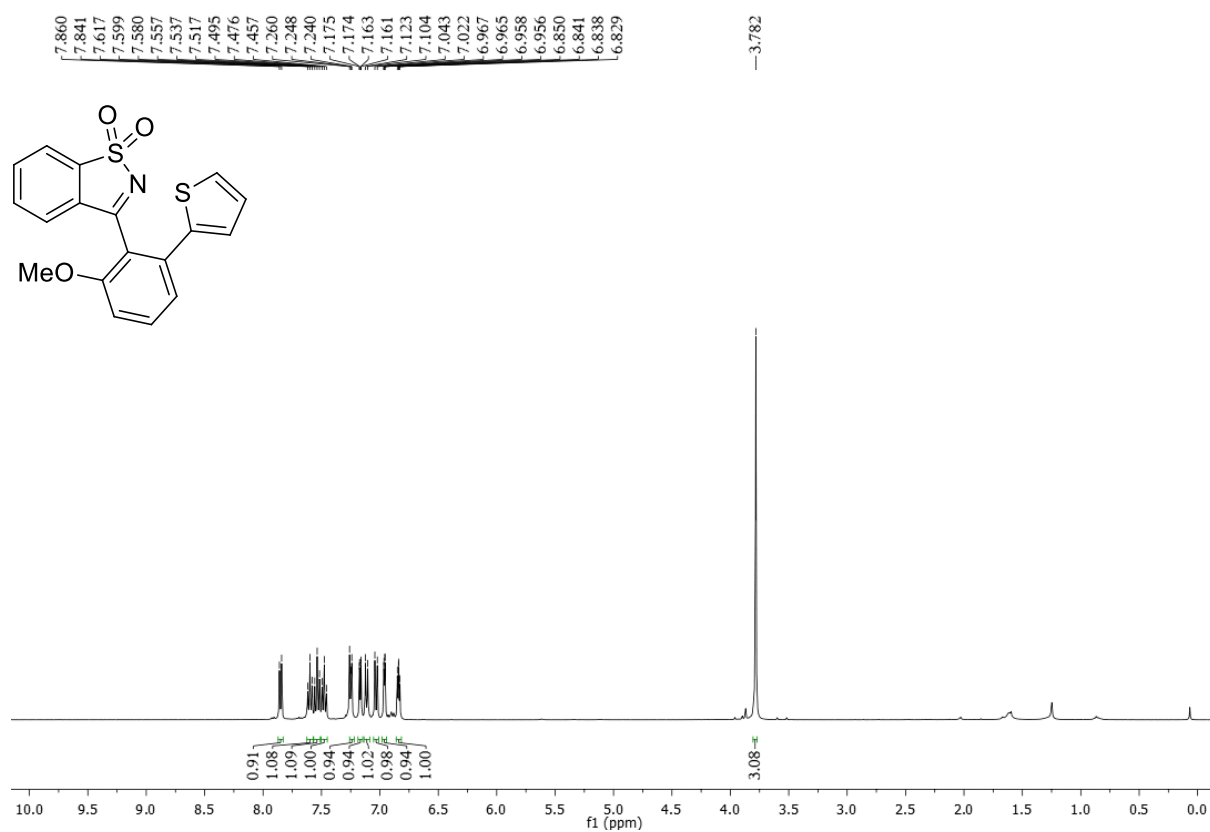

$^{13}\text{C}$  NMR of **3bd** (100MHz,  $\text{CDCl}_3$ ):

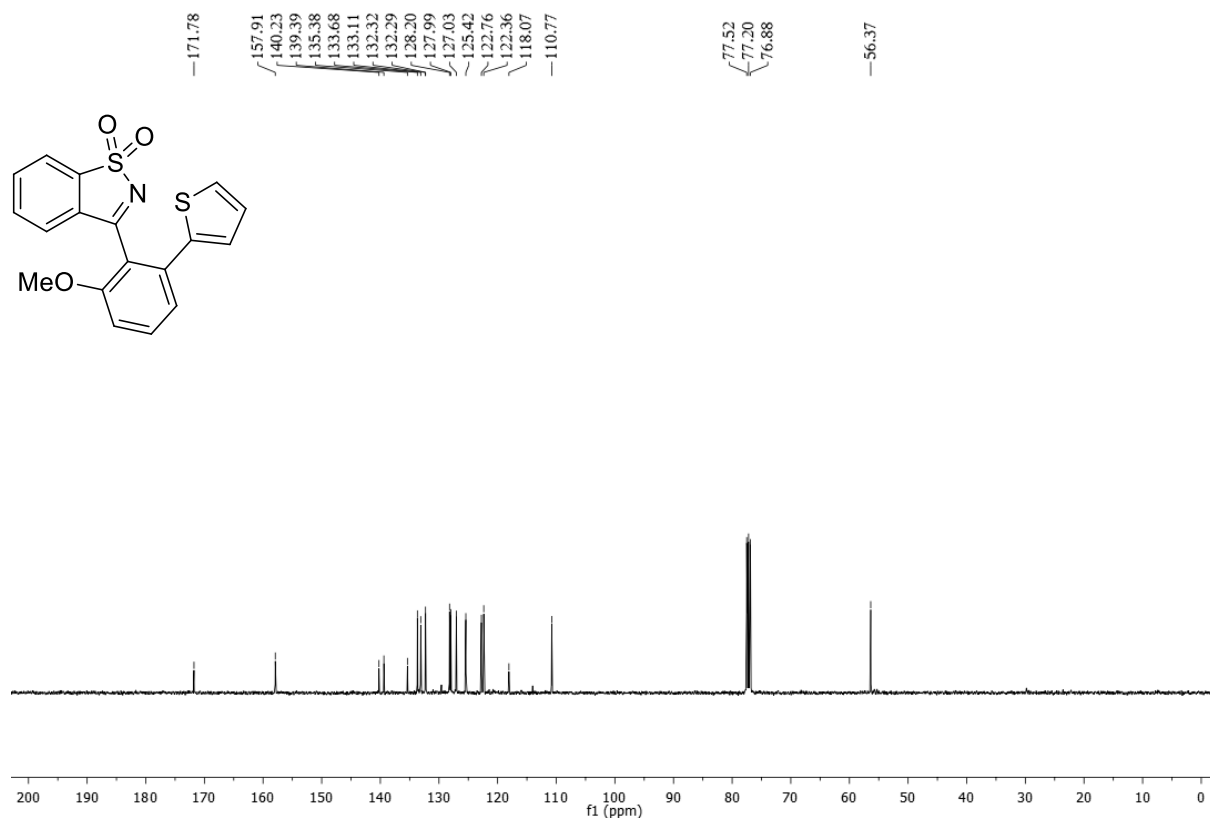

$^1\text{H}$  NMR of **3be** (400MHz,  $\text{CDCl}_3$ ):

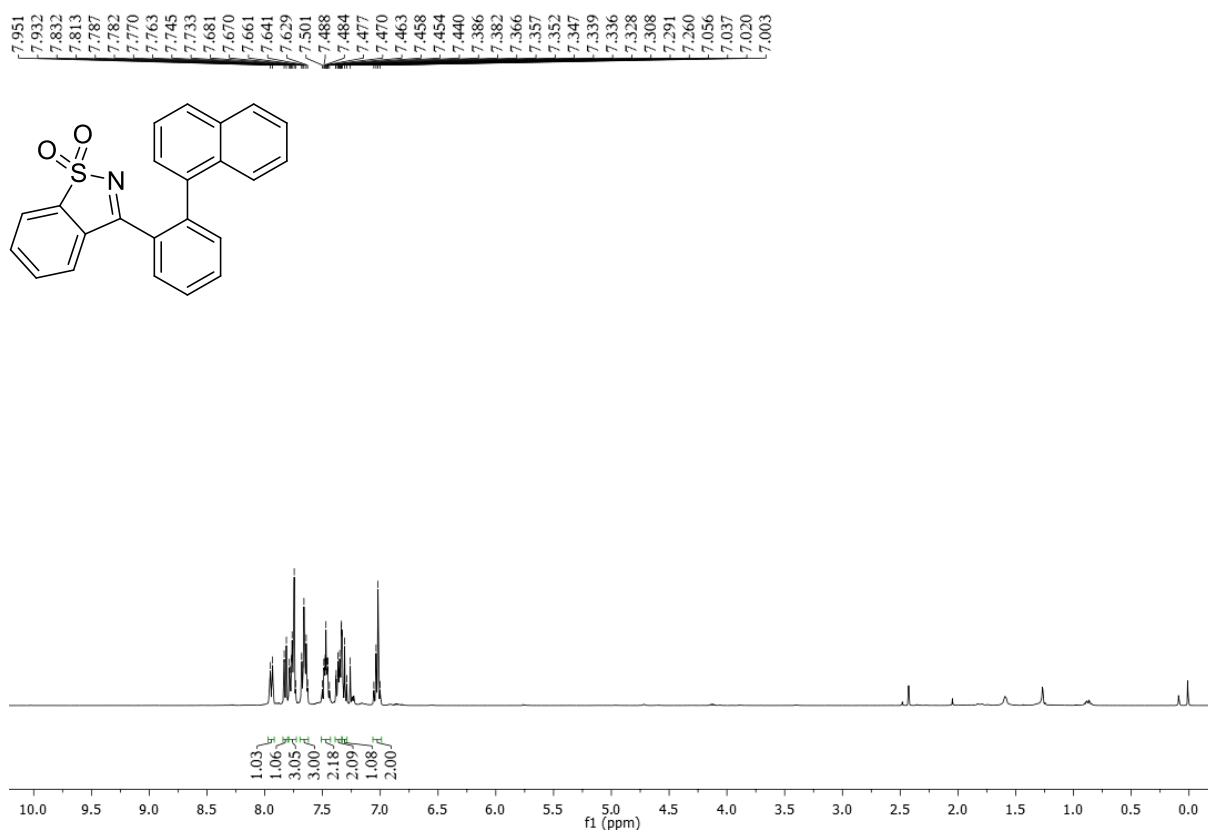

$^{13}\text{C}$  NMR of **3be** (100MHz,  $\text{CDCl}_3$ ):

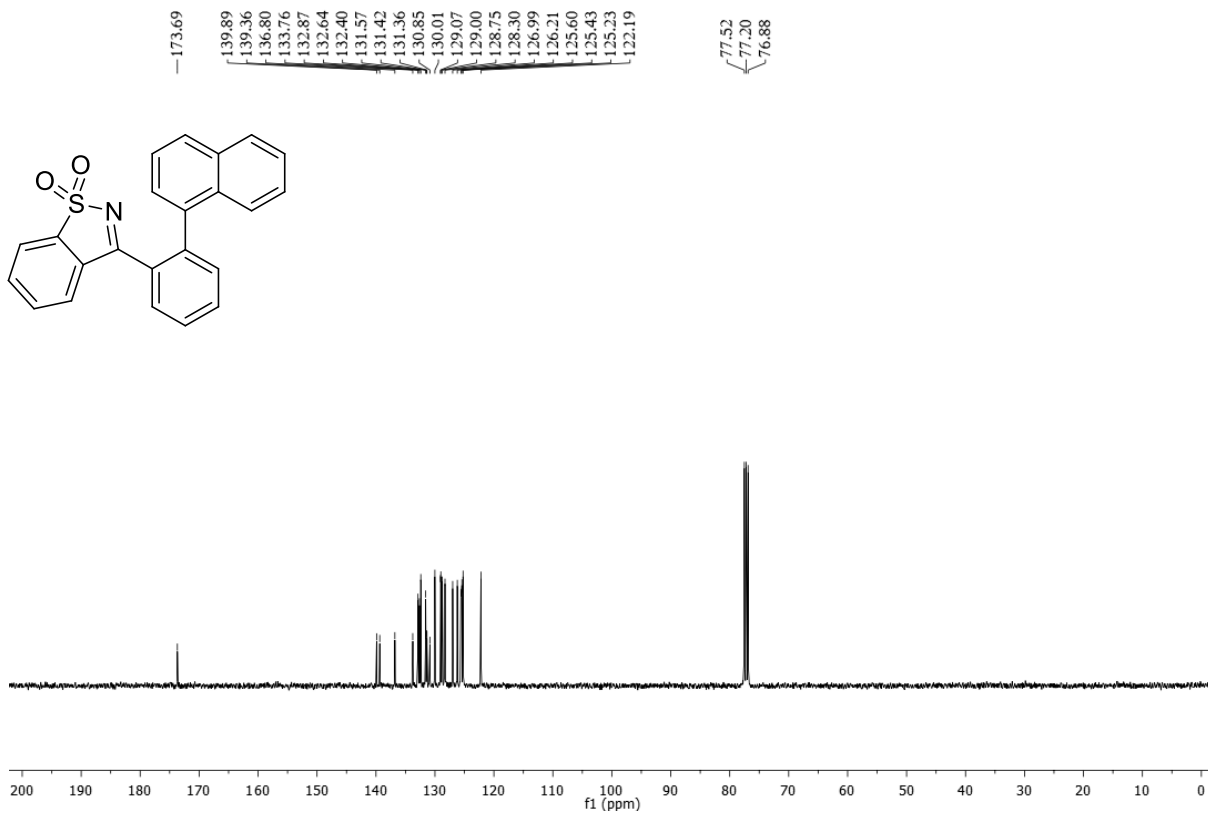

$^1\text{H}$  NMR of **3db** (400MHz,  $\text{CDCl}_3$ ):

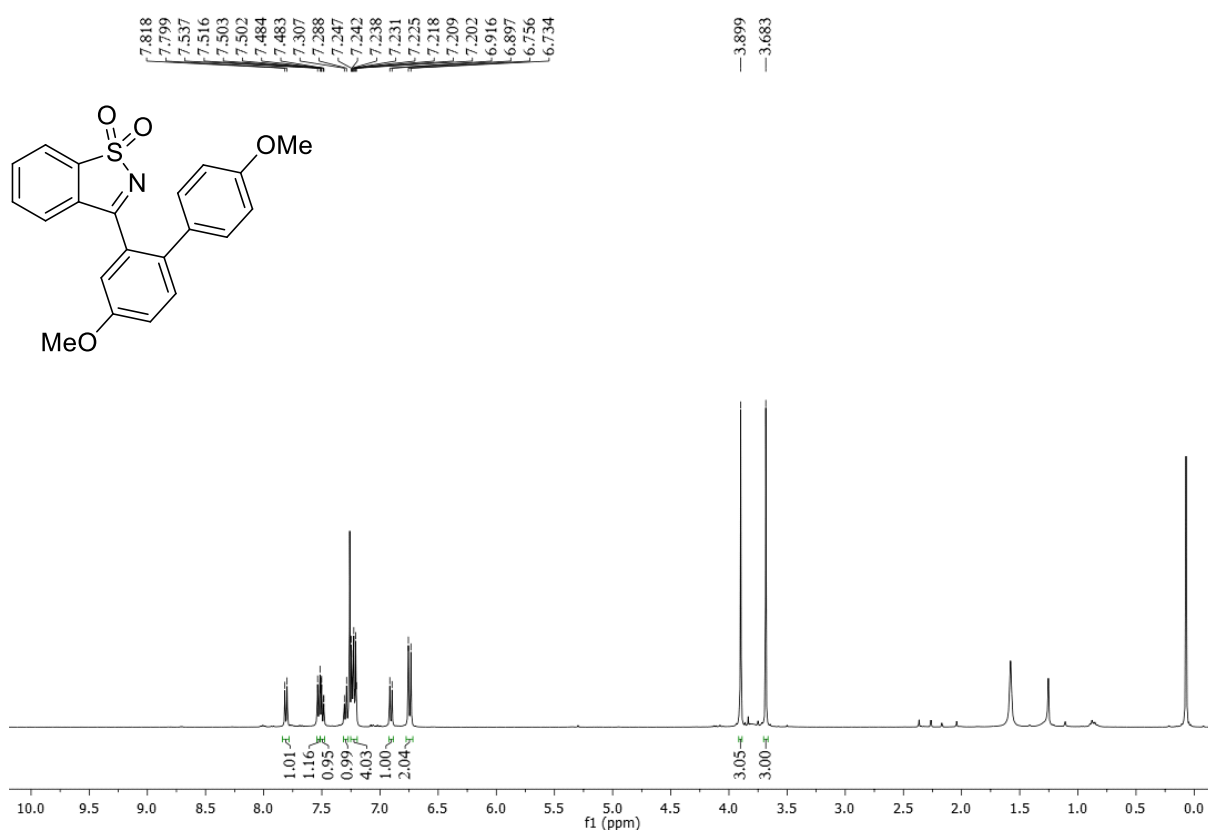

$^{13}\text{C}$  NMR of **3db** (100MHz,  $\text{CDCl}_3$ ):

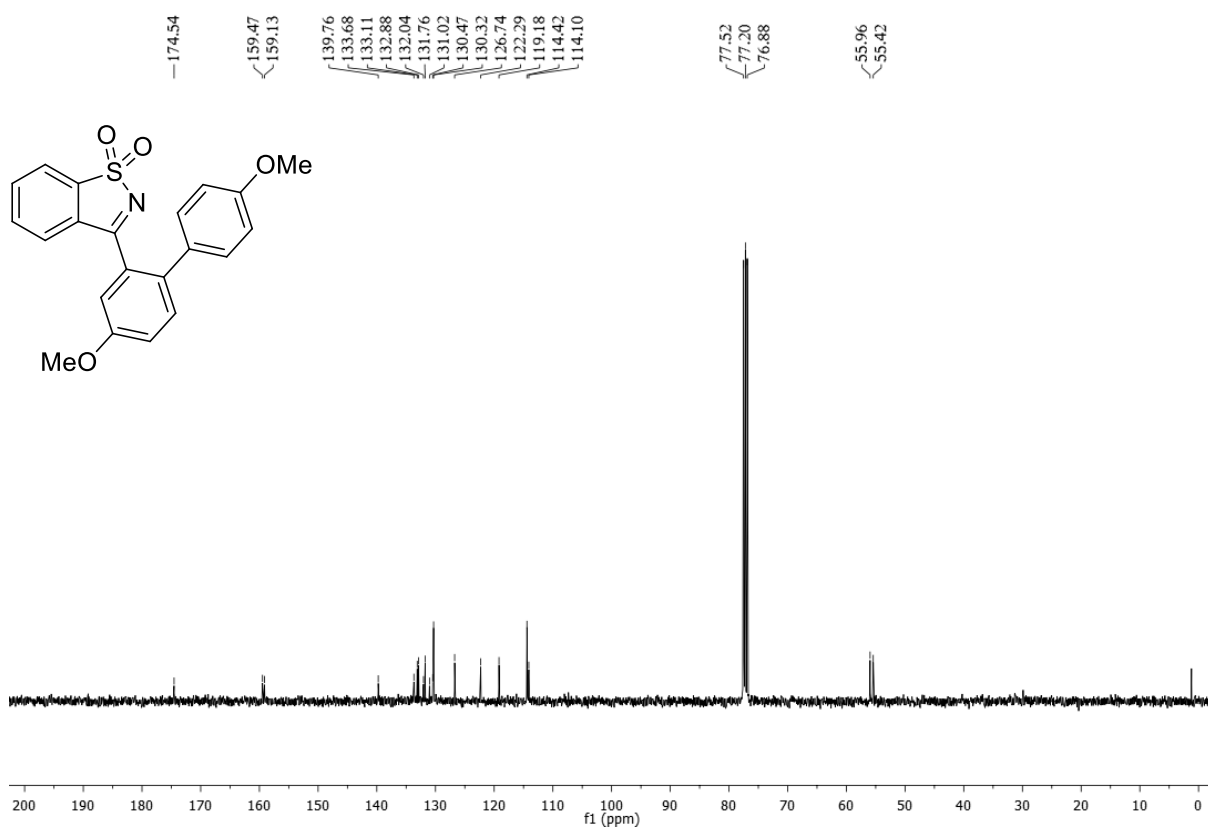

$^1\text{H}$  NMR of **3eb** (400MHz,  $\text{CDCl}_3$ ):

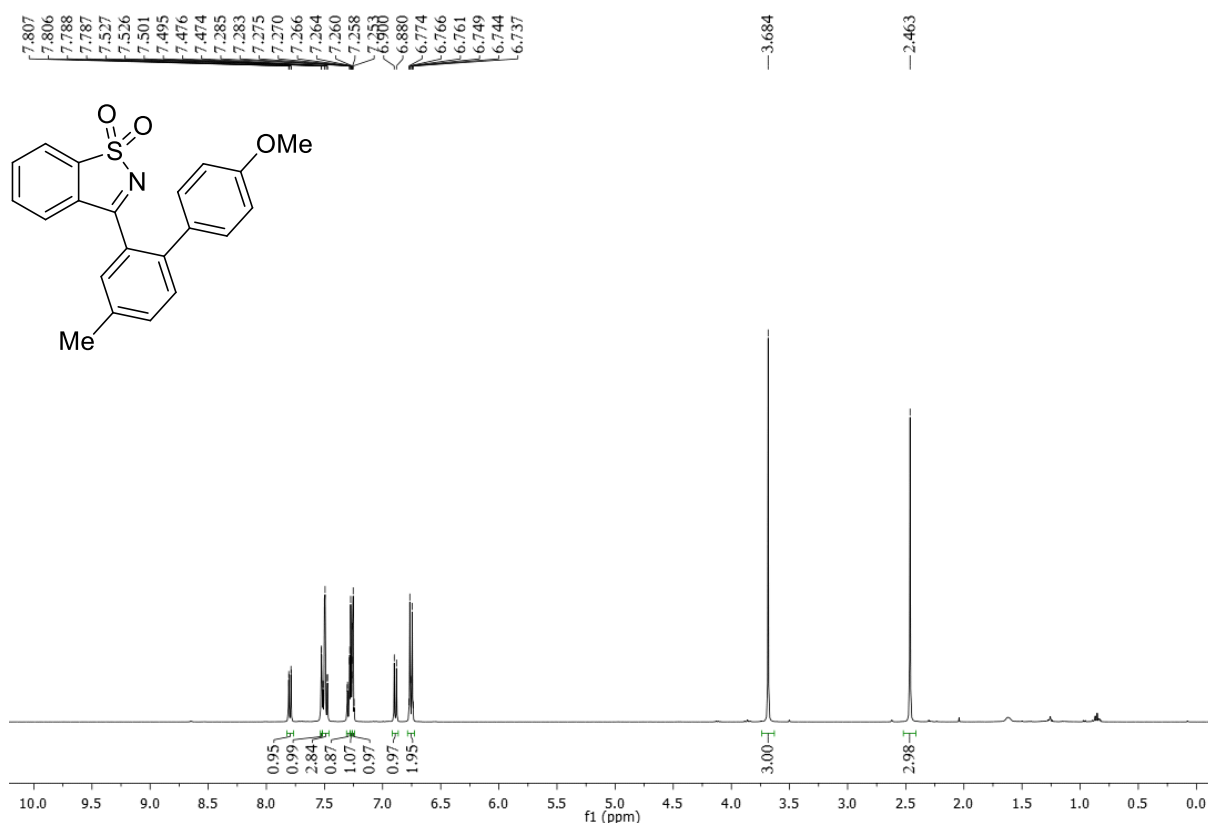

$^{13}\text{C}$  NMR of **3eb** (100MHz,  $\text{CDCl}_3$ ):

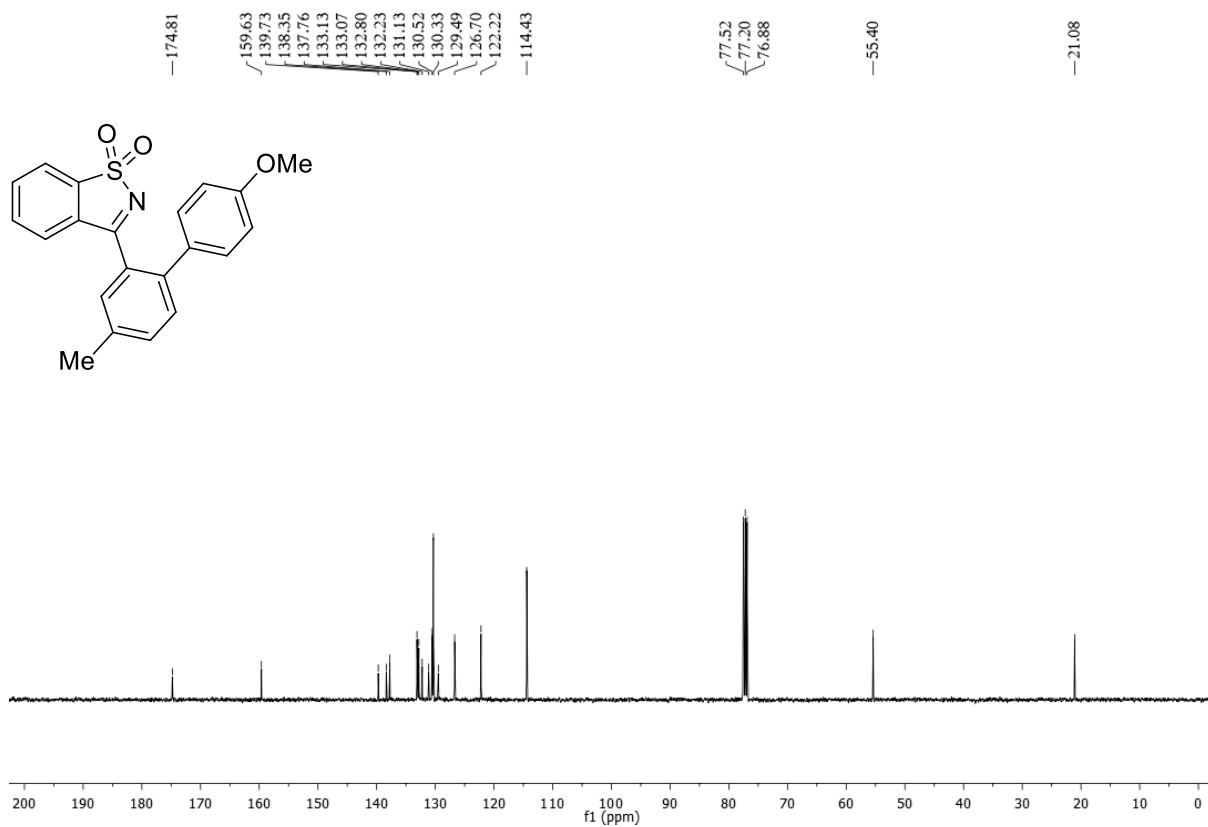

$^1\text{H}$  NMR of **3fb** (400MHz,  $\text{CDCl}_3$ ):

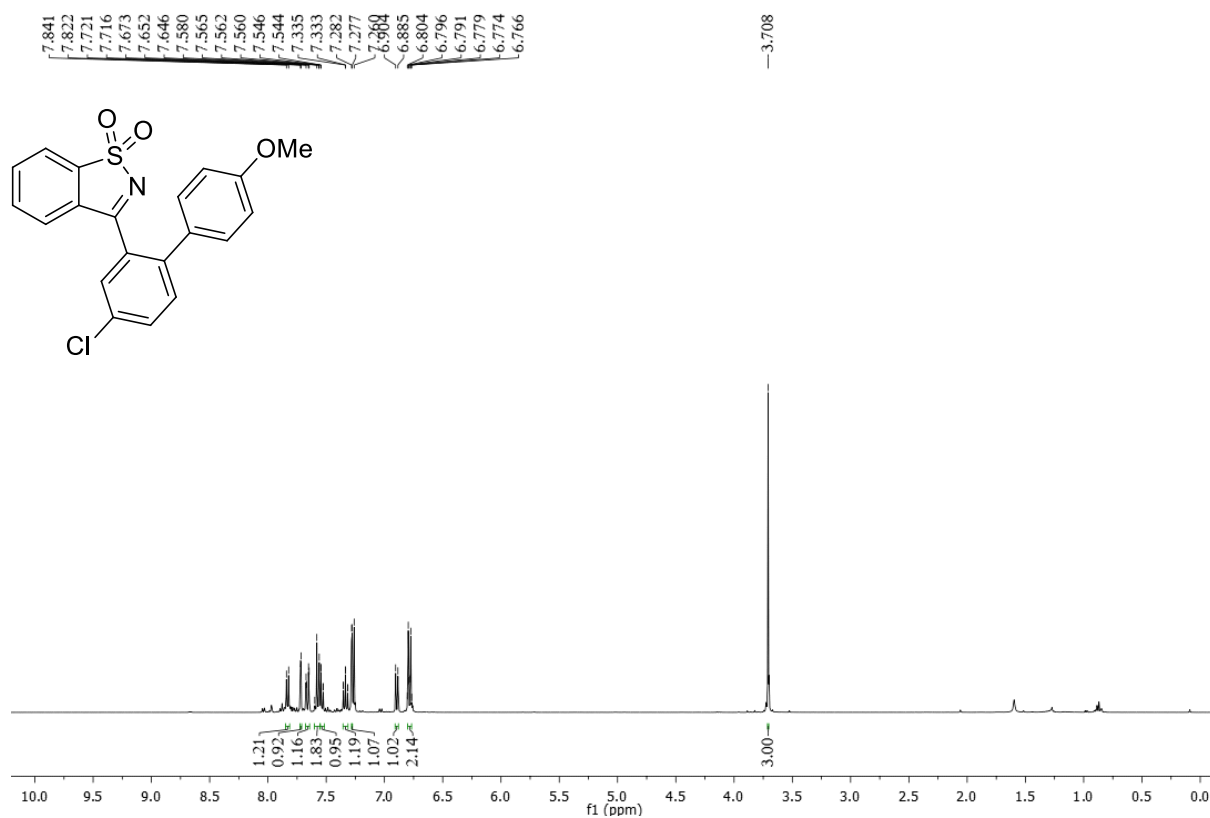

$^{13}\text{C}$  NMR of **3fb** (100MHz,  $\text{CDCl}_3$ ):

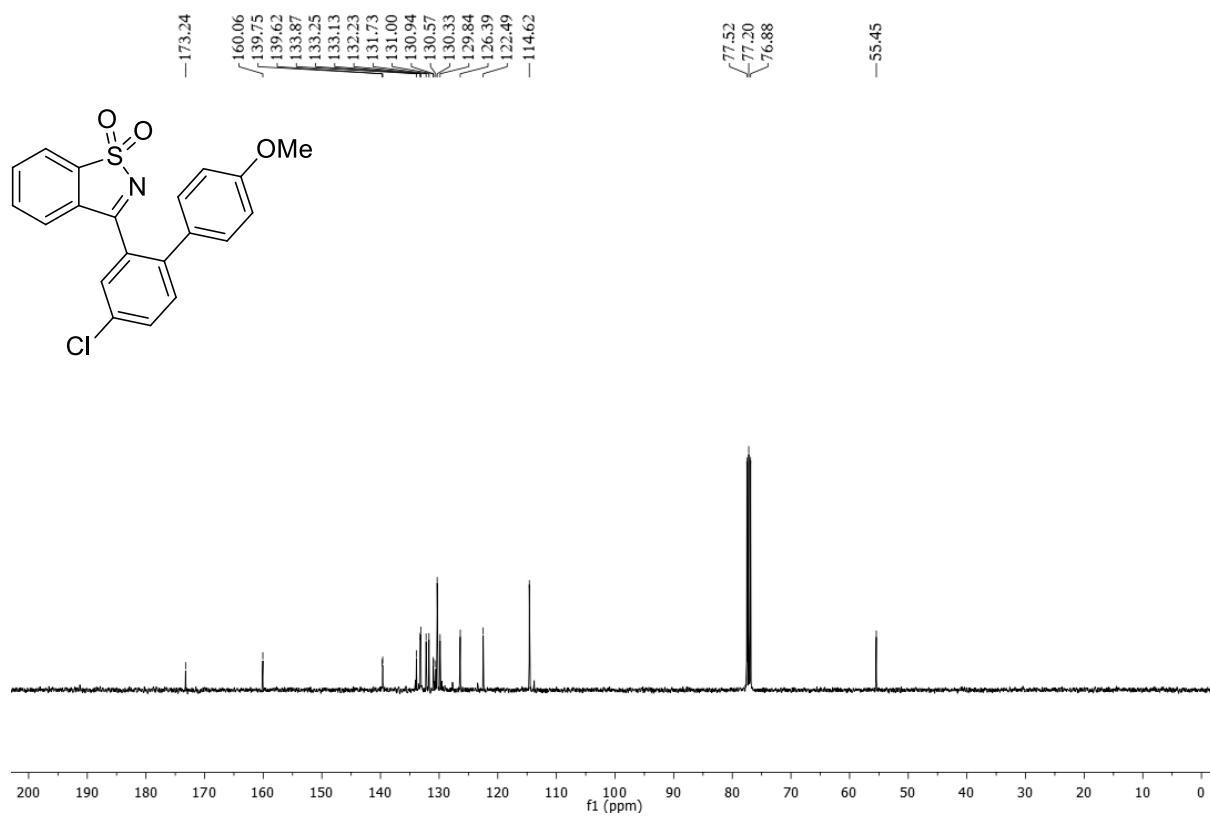

$^1\text{H}$  NMR of **3gb** (600MHz,  $\text{CDCl}_3$ ):

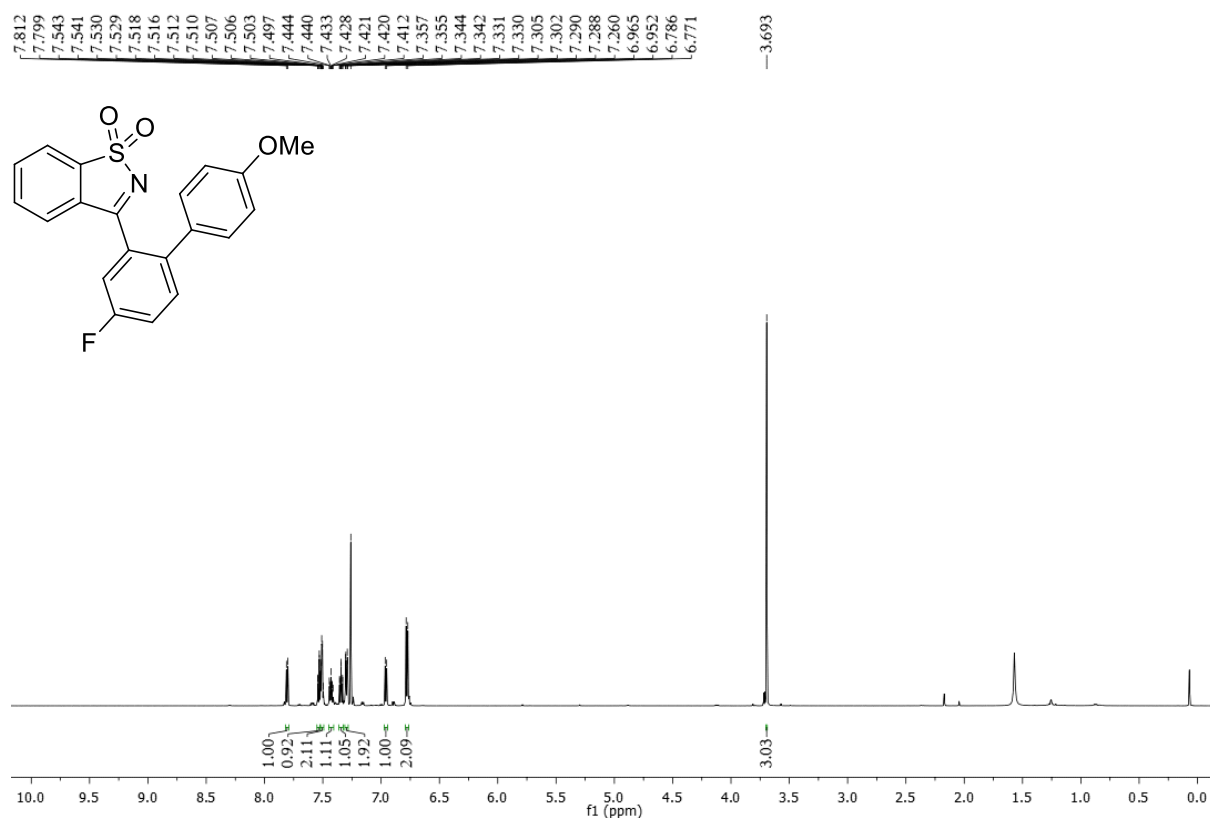

$^{13}\text{C}$  NMR of **3gb** (150MHz,  $\text{CDCl}_3$ ):

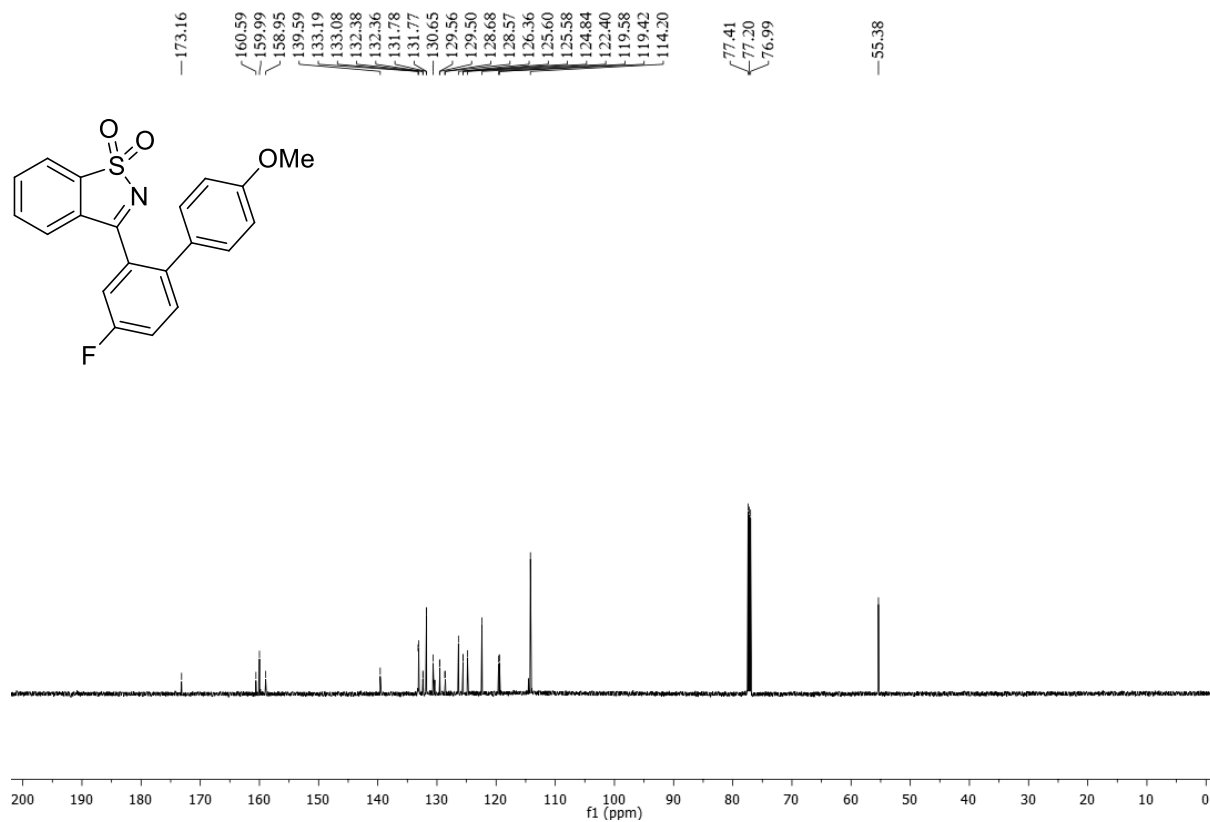

$^1\text{H}$  NMR of **3hb** (400MHz,  $\text{CDCl}_3$ ):

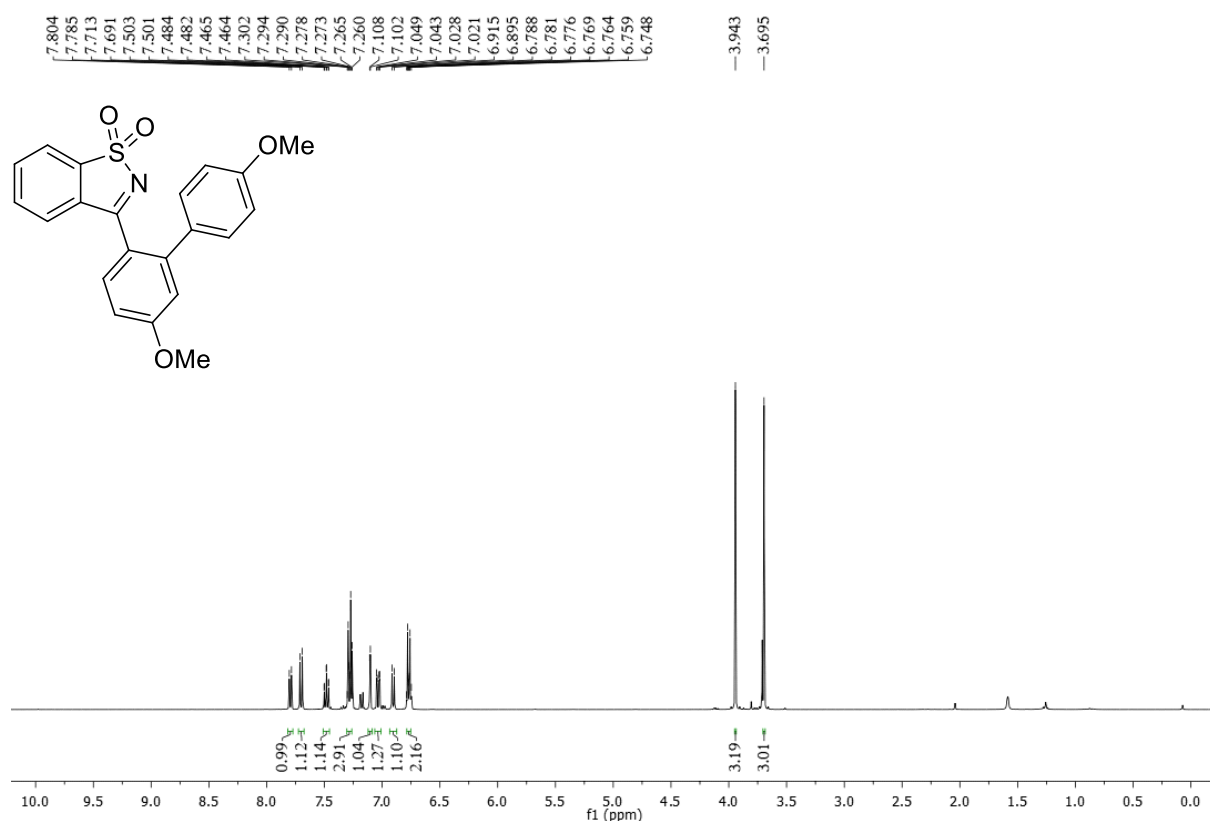

$^{13}\text{C}$  NMR of **3hb** (100MHz,  $\text{CDCl}_3$ ):

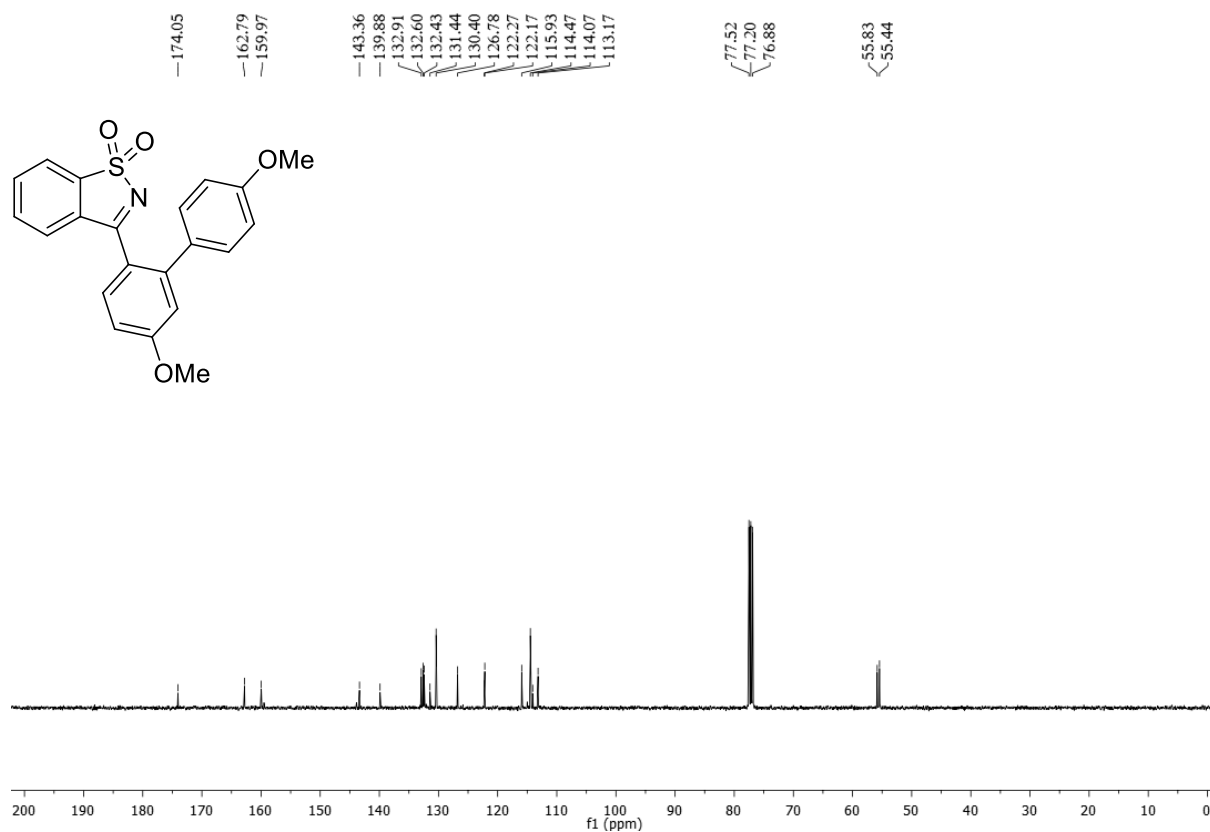

$^1\text{H}$  NMR of **3ib** (600MHz,  $\text{CDCl}_3$ ):

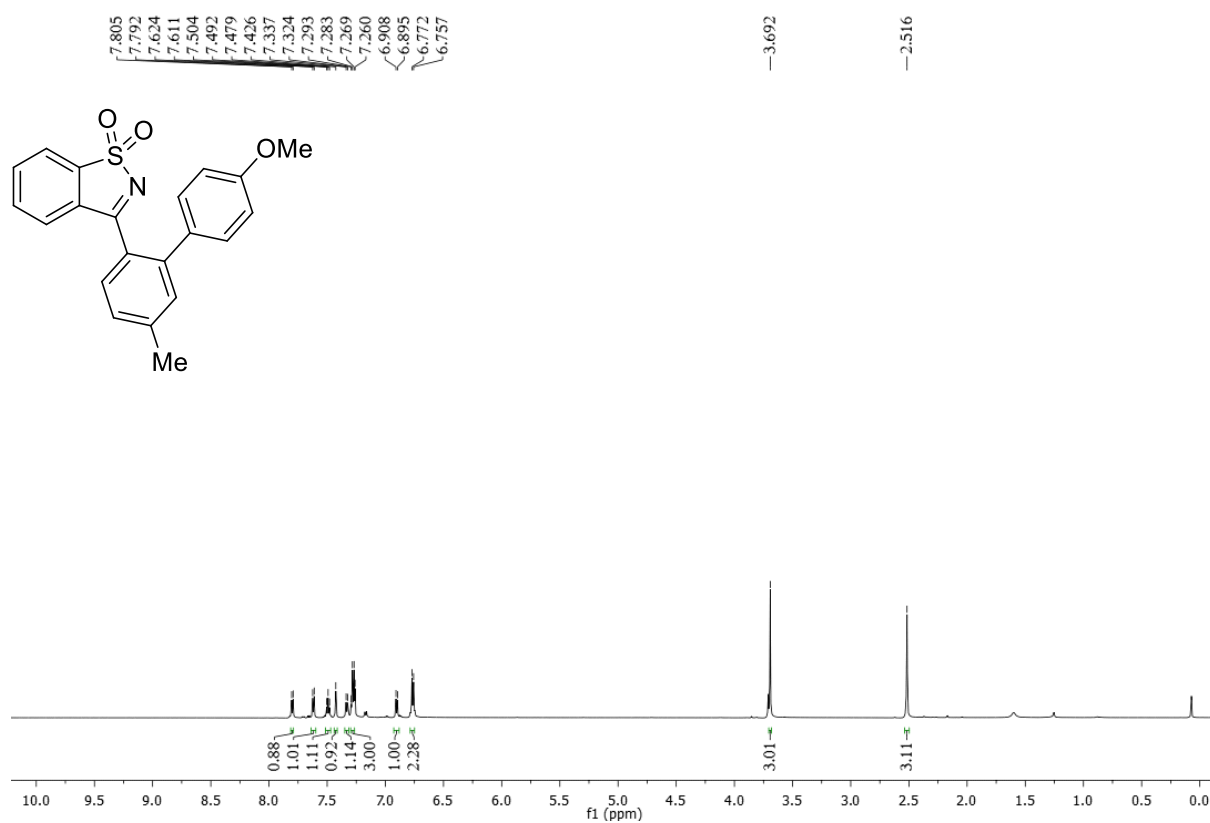

$^{13}\text{C}$  NMR of **3ib** (150MHz,  $\text{CDCl}_3$ ):

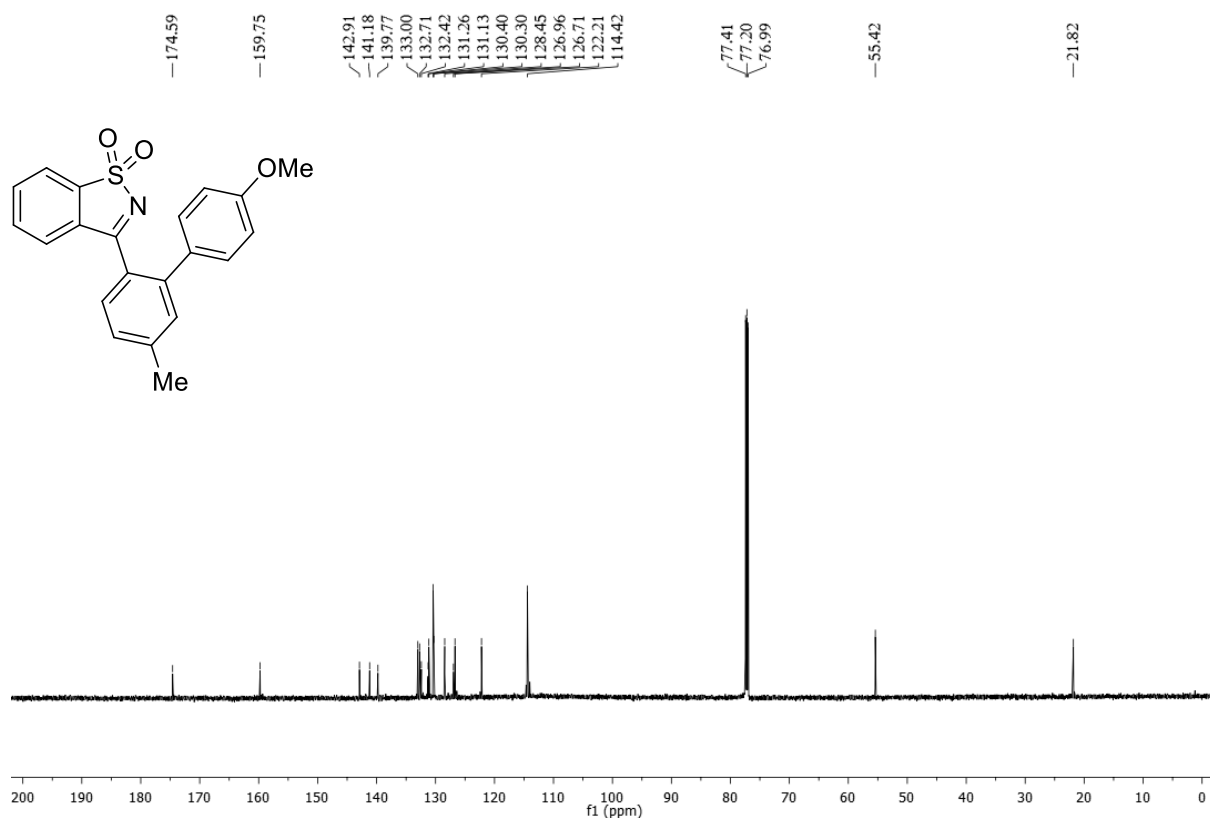

$^1\text{H}$  NMR of **3jb** (400MHz,  $\text{CDCl}_3$ ):

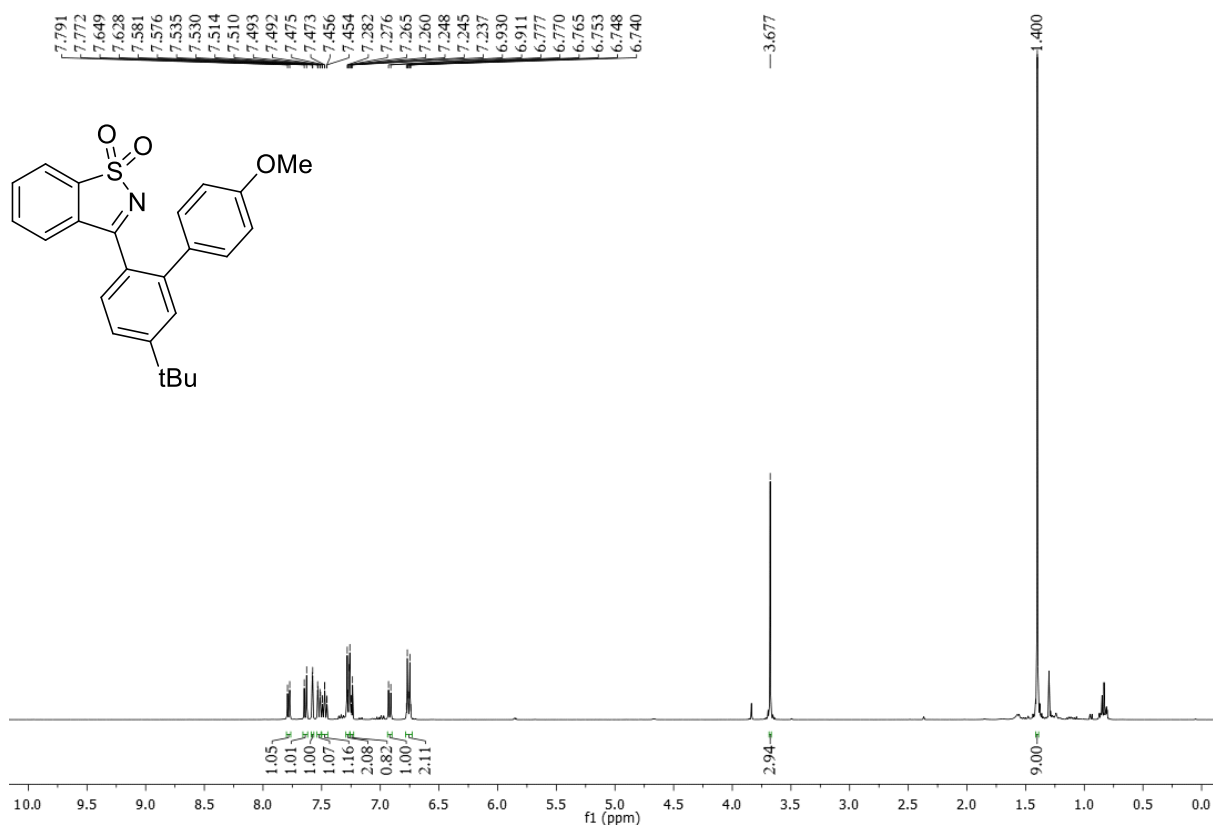

$^{13}\text{C}$  NMR of **3jb** (100MHz,  $\text{CDCl}_3$ ):

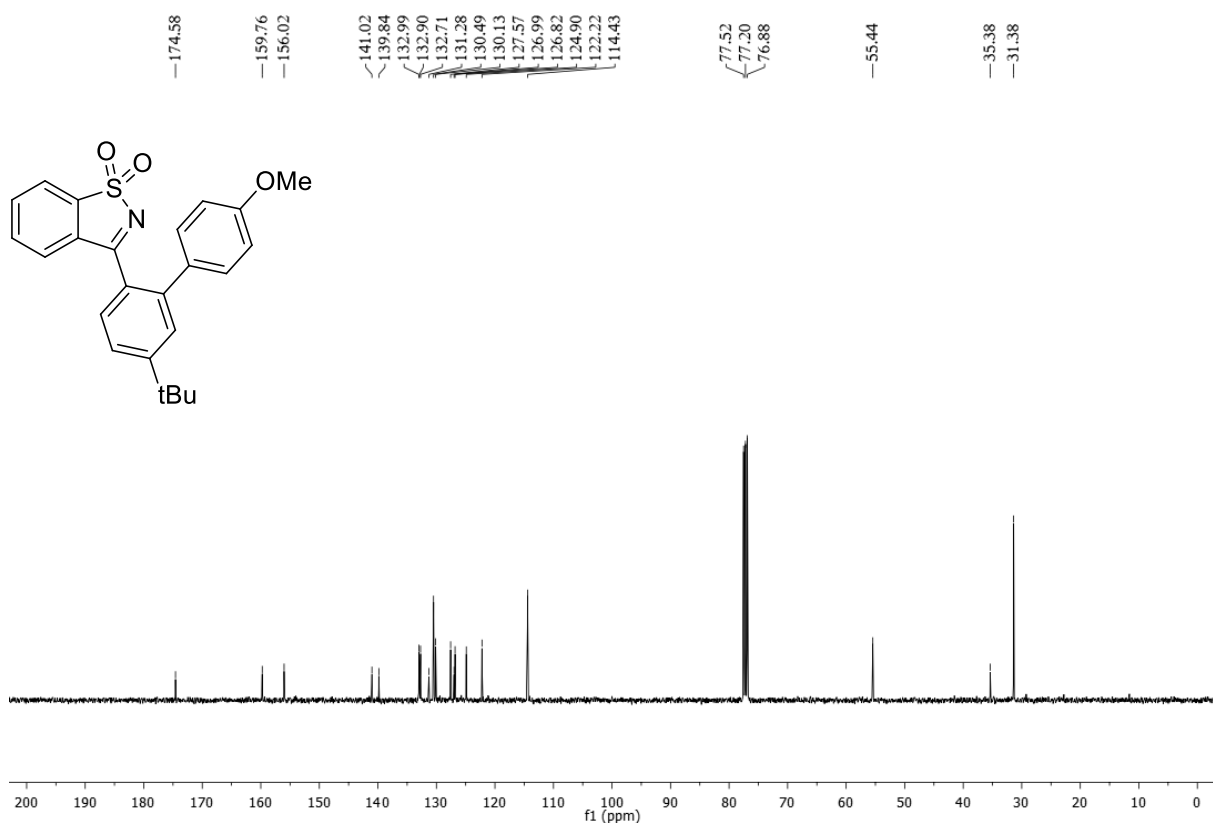

$^1\text{H}$  NMR of **3kb** (400MHz,  $\text{CDCl}_3$ ):

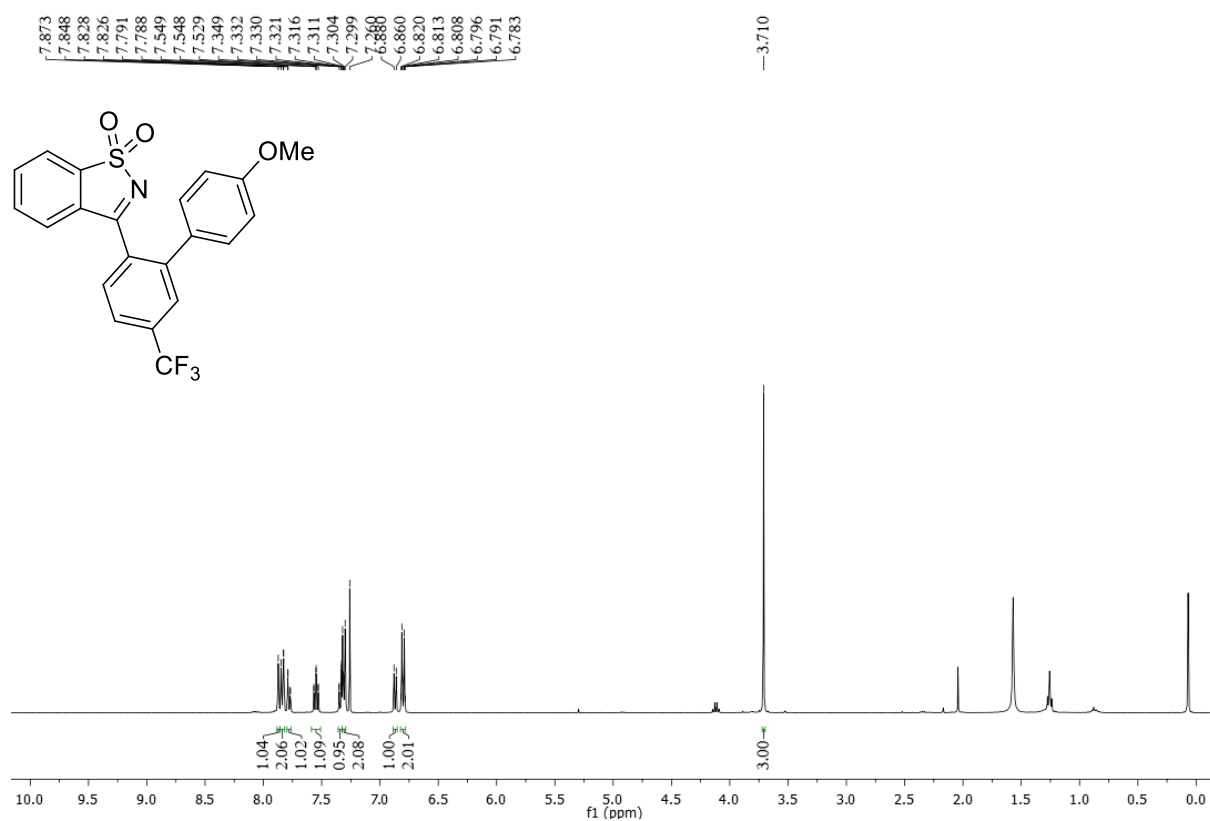

$^{13}\text{C}$  NMR of **3kb** (100MHz,  $\text{CDCl}_3$ ):

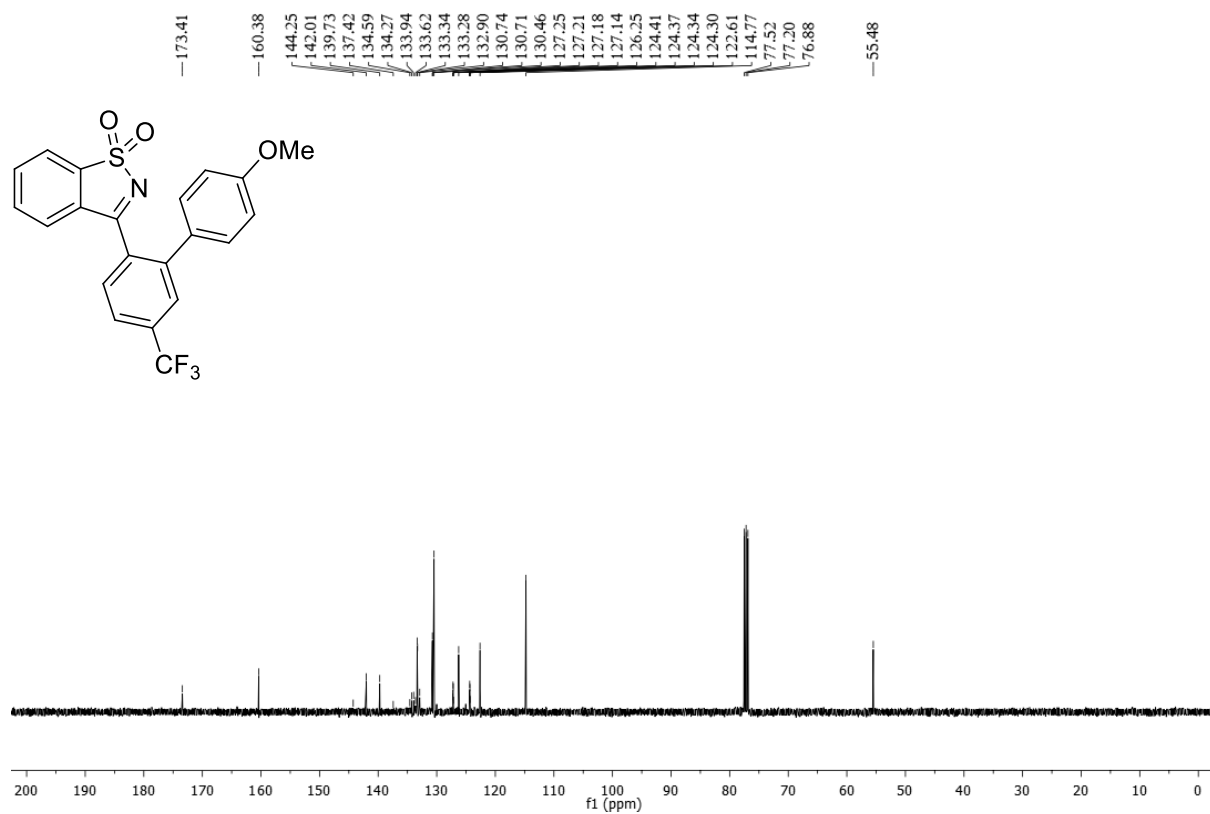

$^1\text{H}$  NMR of **3lb** (400MHz,  $\text{CDCl}_3$ ):

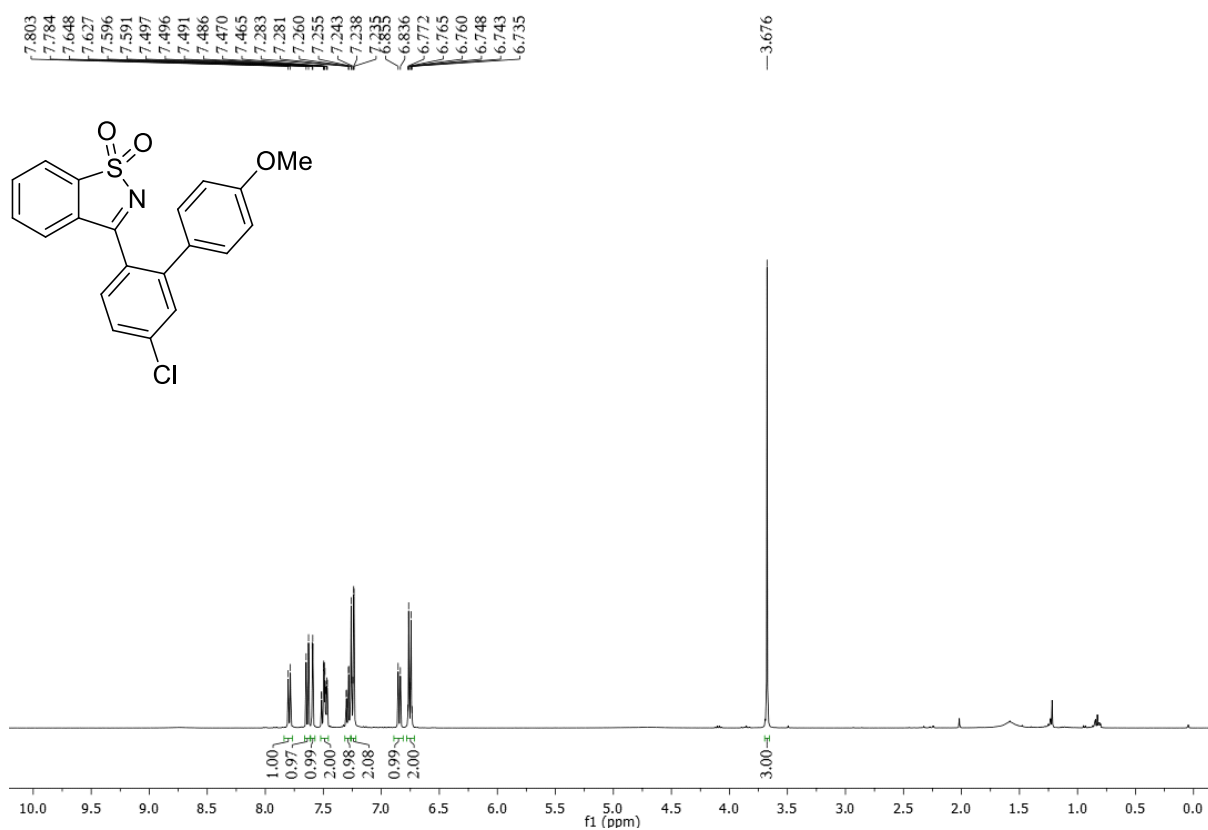

$^{13}\text{C}$  NMR of **3lb** (100MHz,  $\text{CDCl}_3$ ):

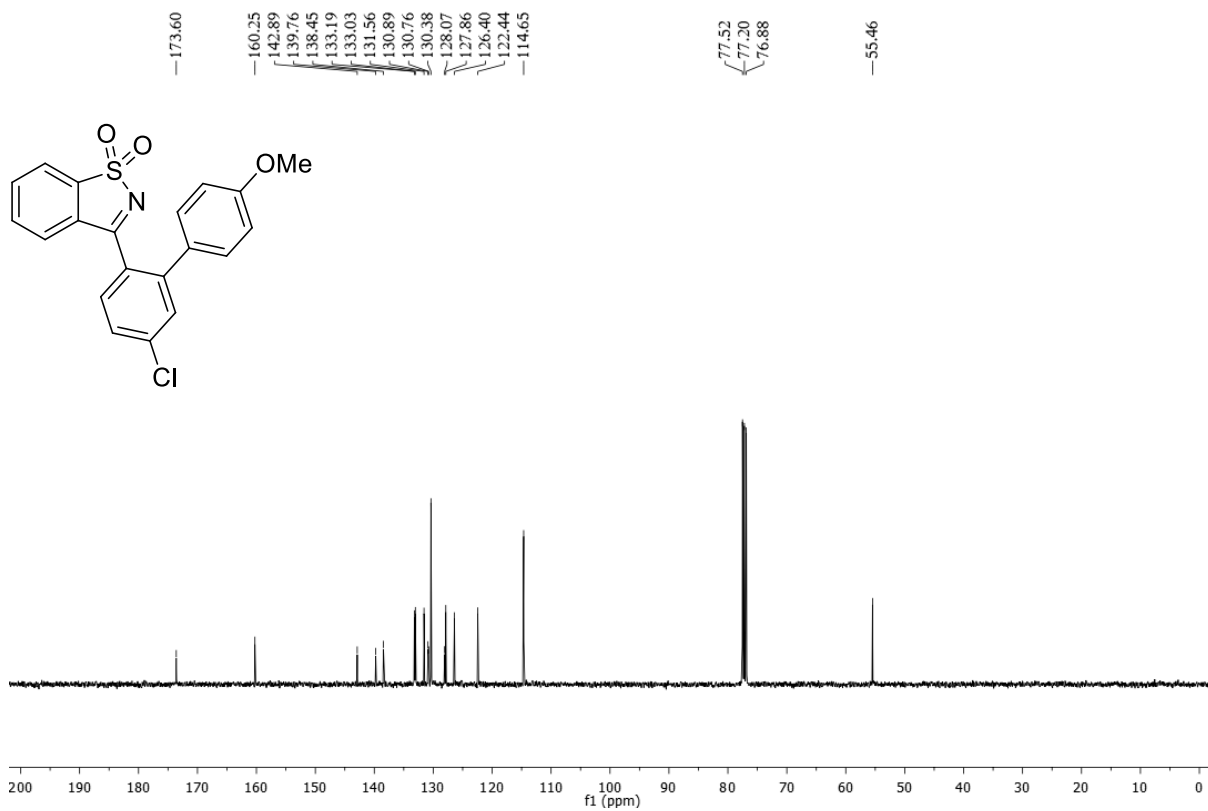

$^1\text{H}$  NMR of **3mb** (400MHz,  $\text{CDCl}_3$ ):

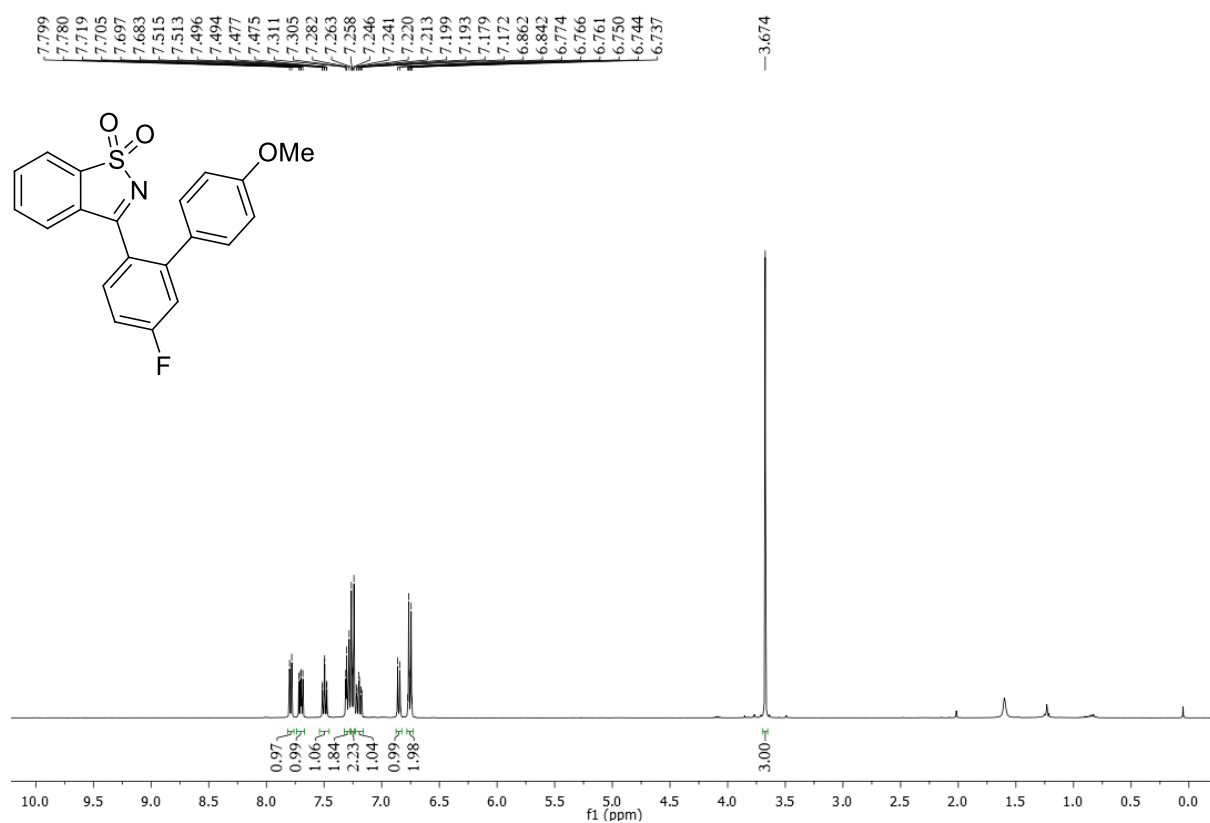

$^{13}\text{C}$  NMR of **3mb** (100MHz,  $\text{CDCl}_3$ ):

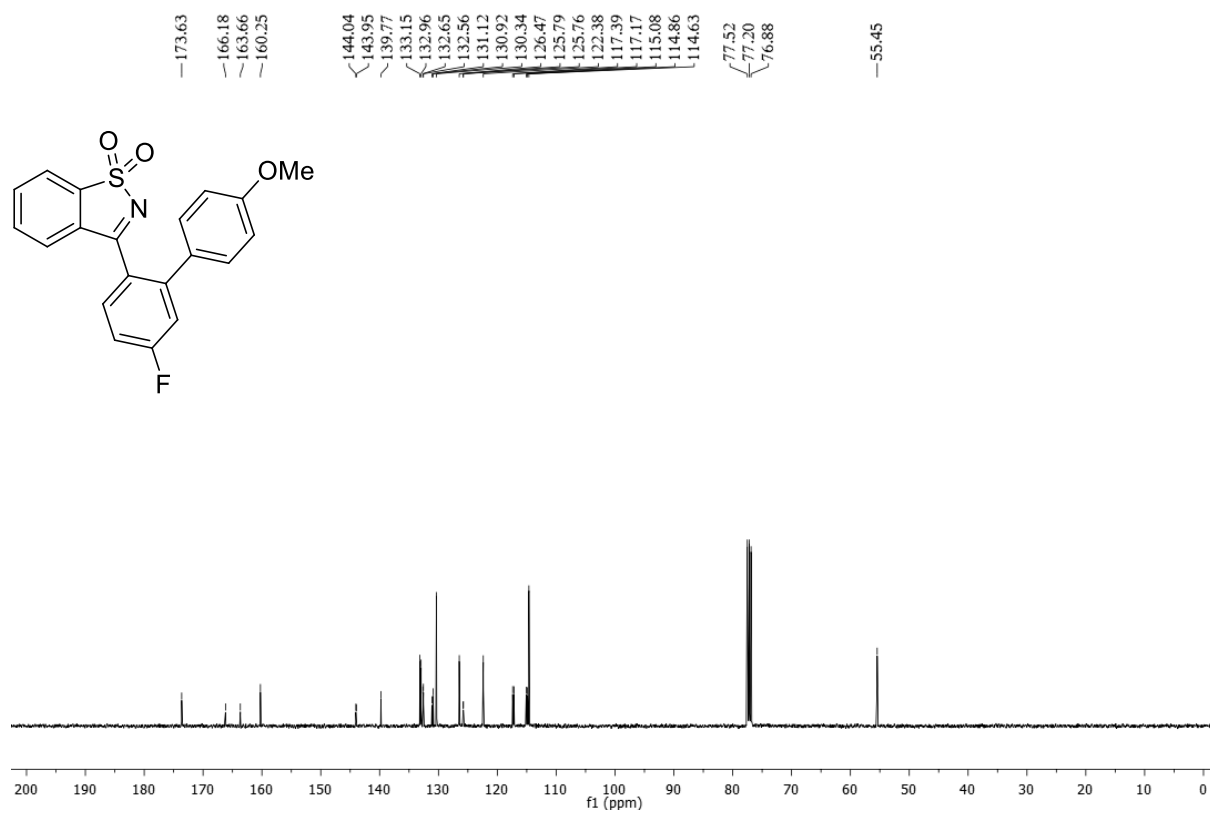

$^1\text{H}$  NMR of **3nb** (400MHz,  $\text{CDCl}_3$ ):

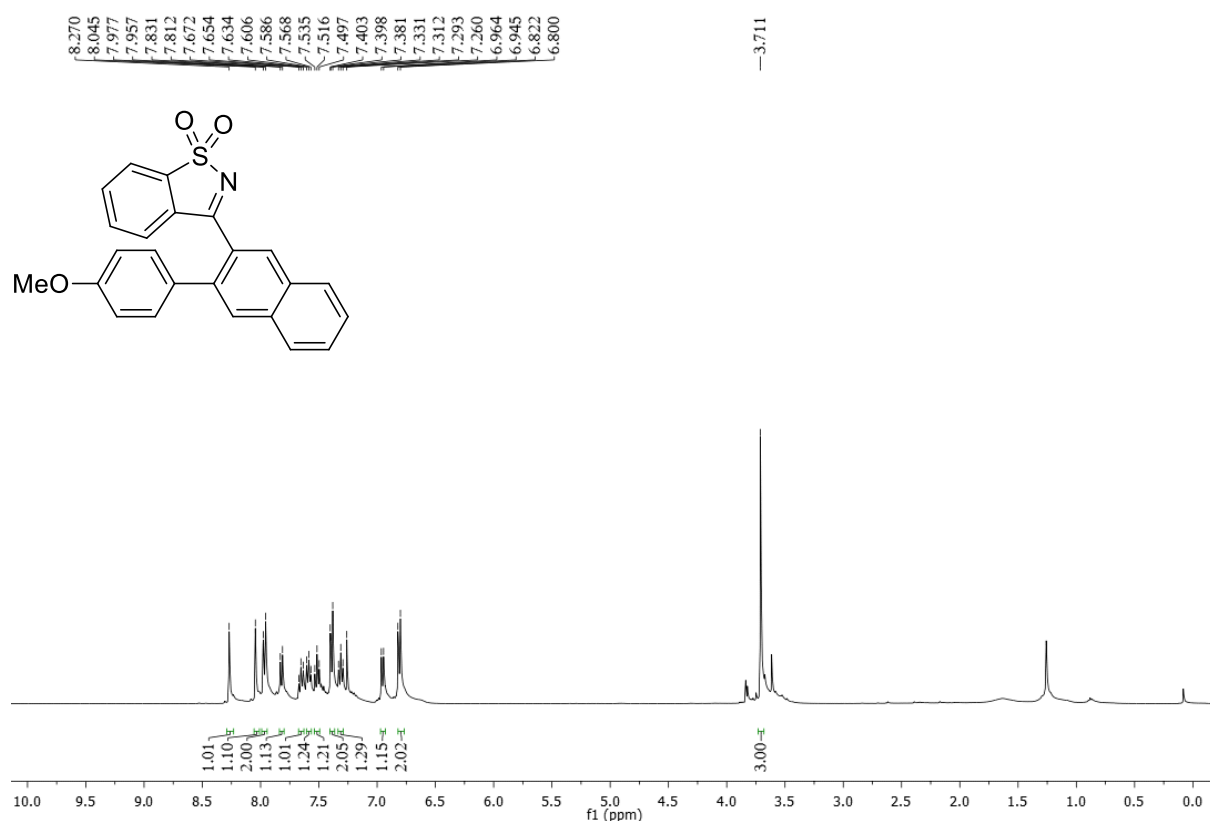

$^{13}\text{C}$  NMR of **3nb** (100MHz,  $\text{CDCl}_3$ ):

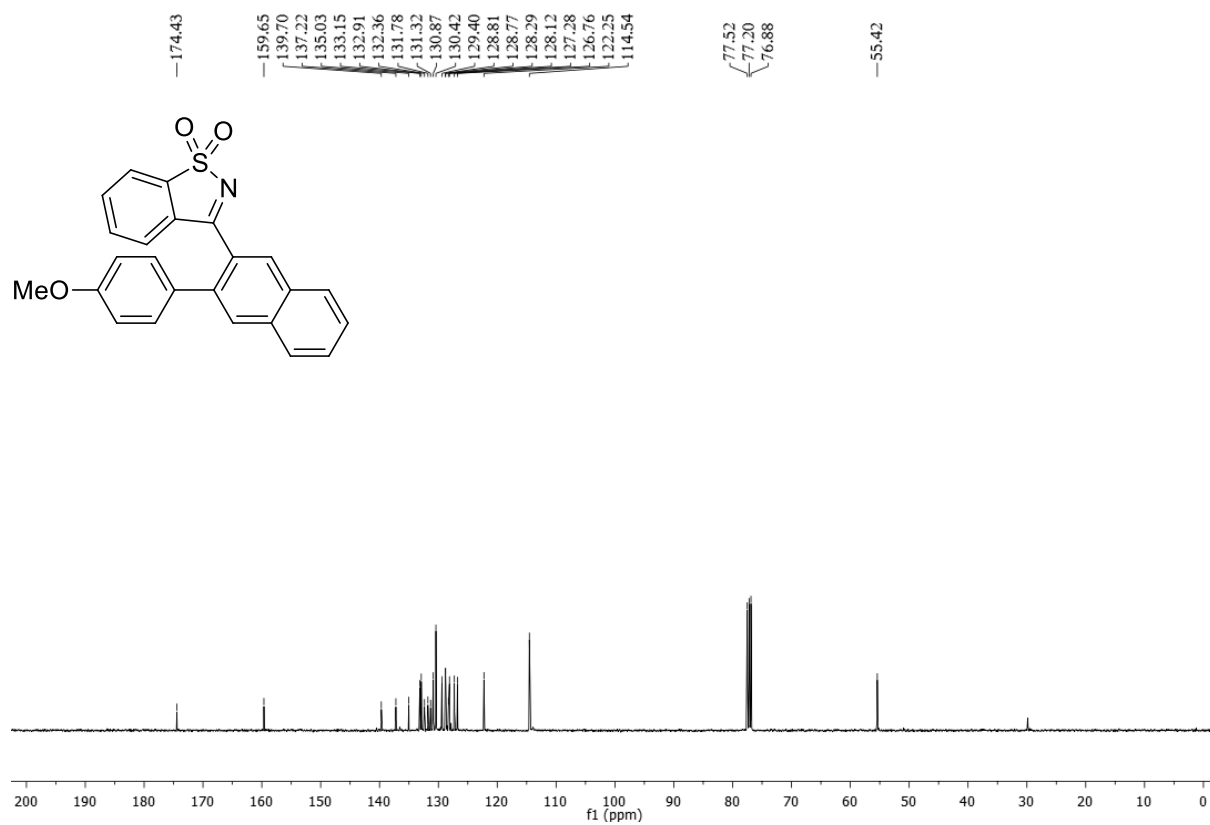

$^1\text{H}$  NMR of **3ob** (400MHz,  $\text{CDCl}_3$ ):

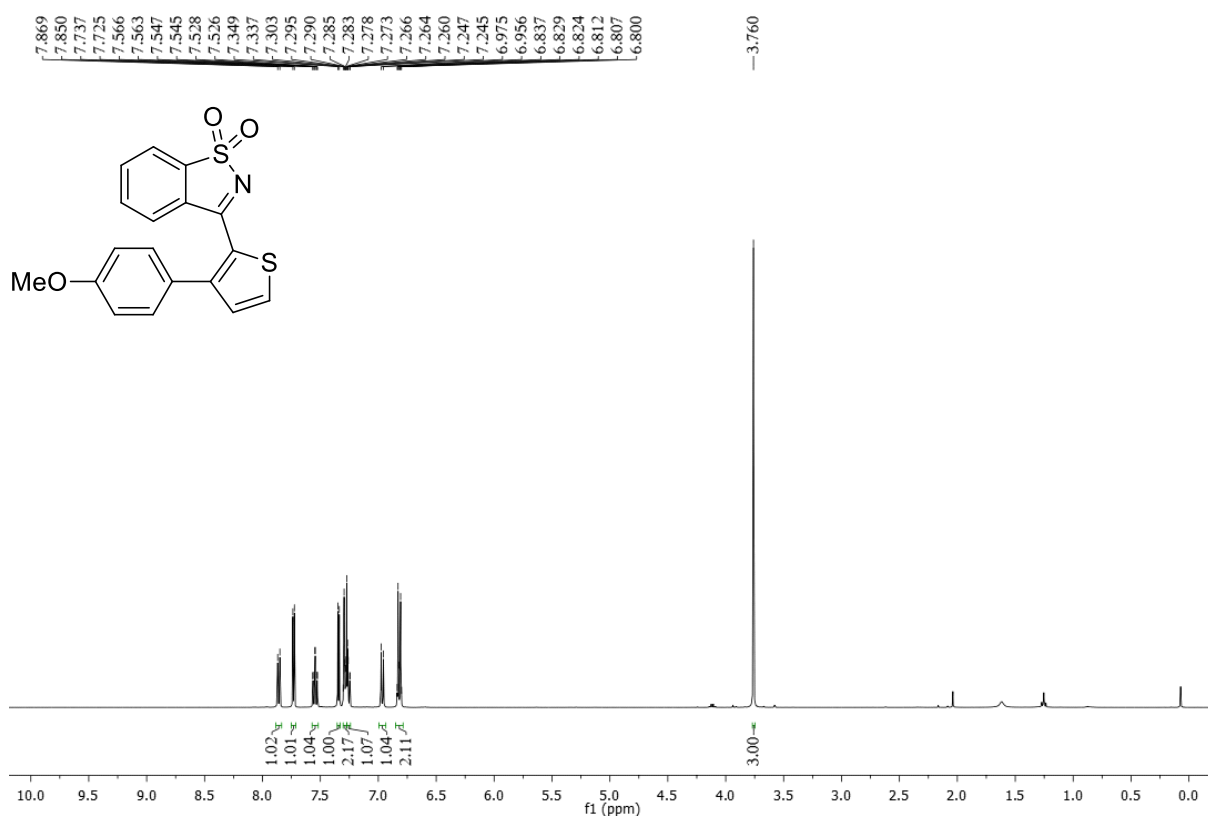

$^{13}\text{C}$  NMR of **3ob** (100MHz,  $\text{CDCl}_3$ ):

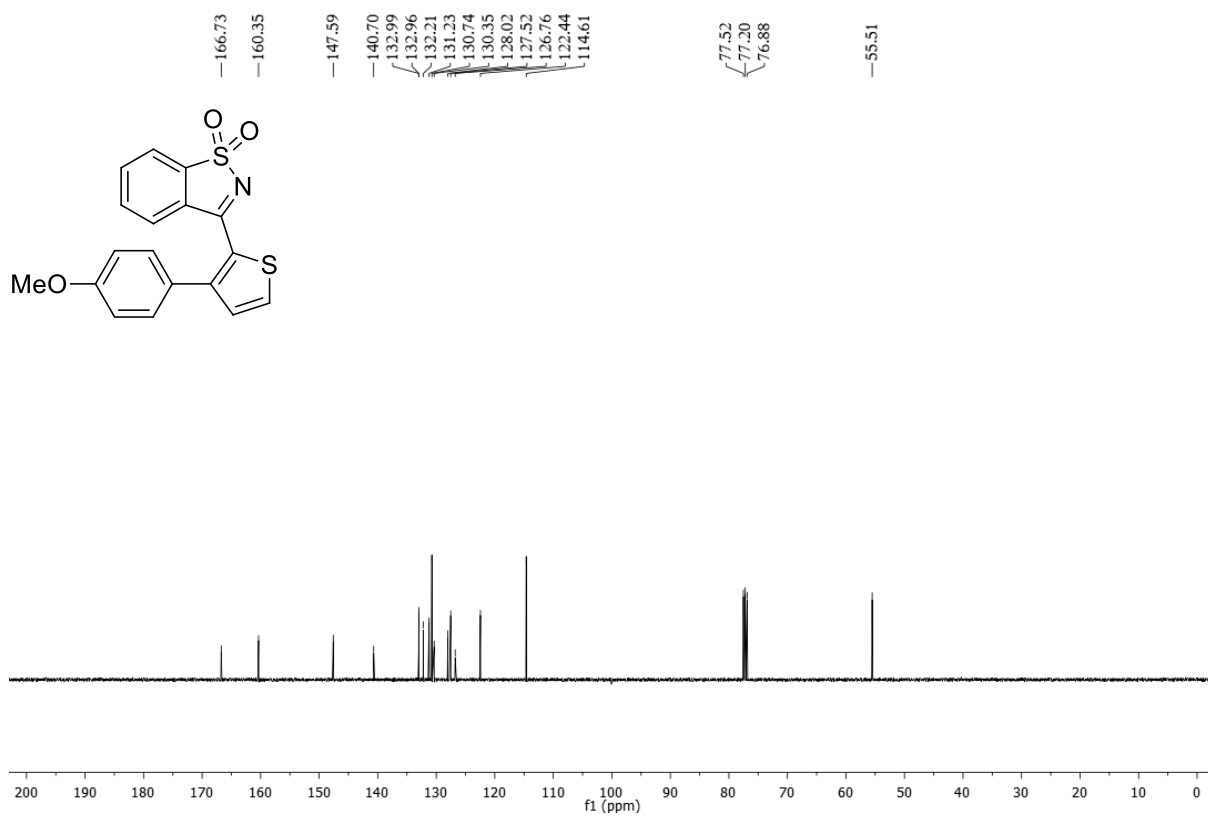

$^1\text{H}$  NMR of **5aa** (400MHz,  $\text{CDCl}_3$ ):

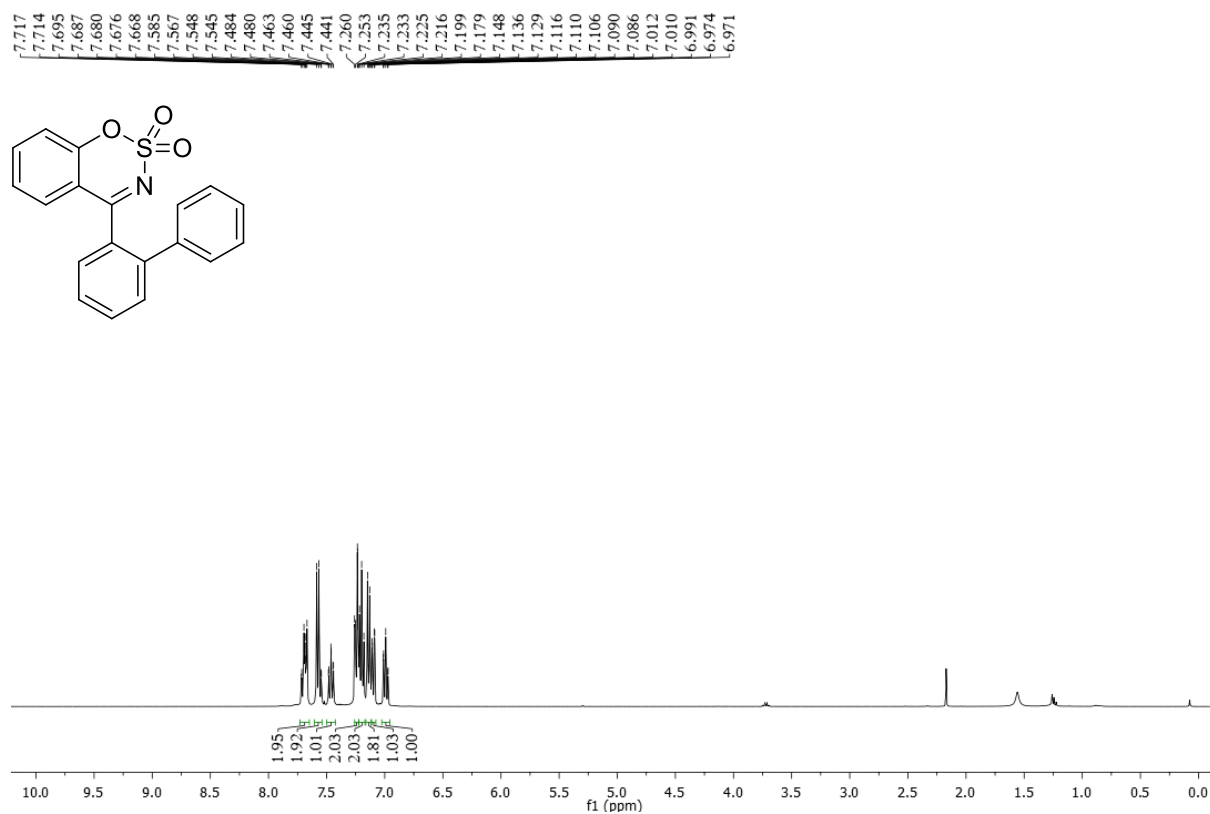

$^{13}\text{C}$  NMR of **5aa** (100MHz,  $\text{CDCl}_3$ ):

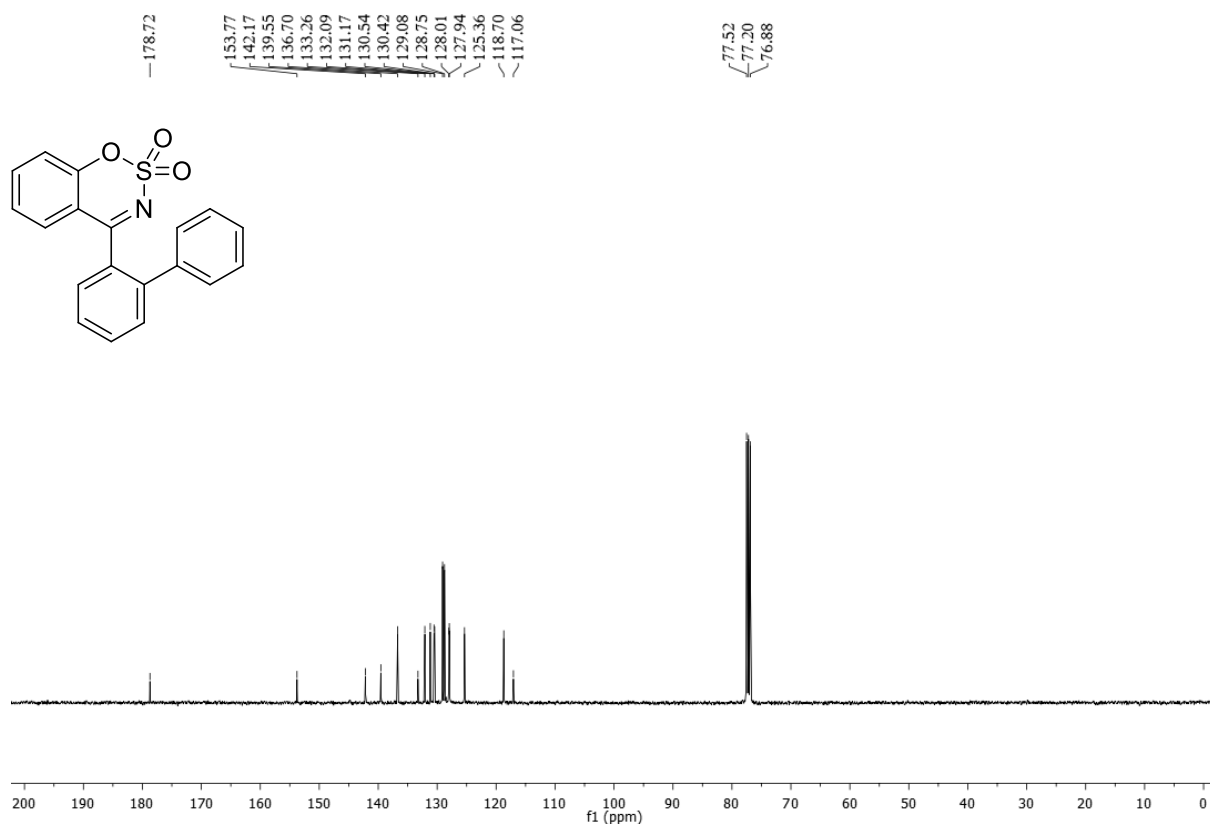

$^1\text{H}$  NMR of **5ba** (400MHz,  $\text{CDCl}_3$ ):

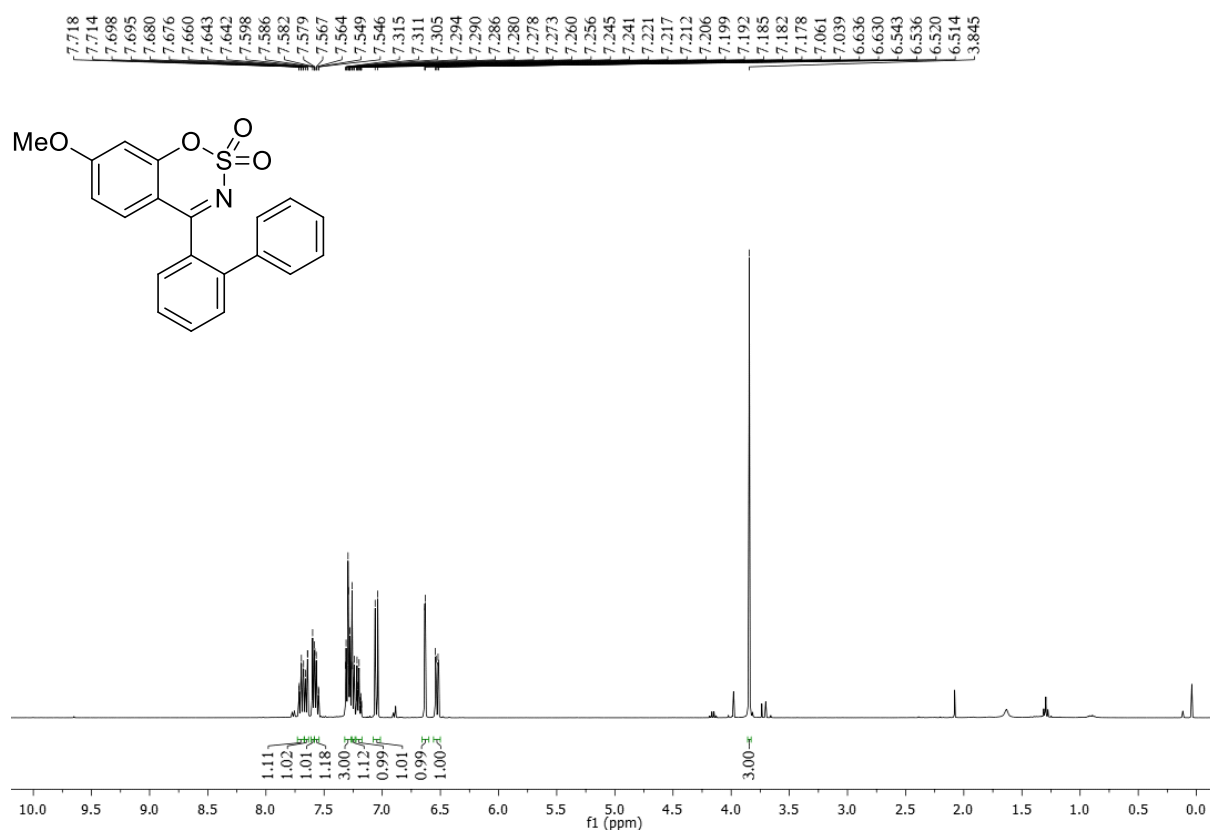

$^{13}\text{C}$  NMR of **5ba** (100MHz,  $\text{CDCl}_3$ ):

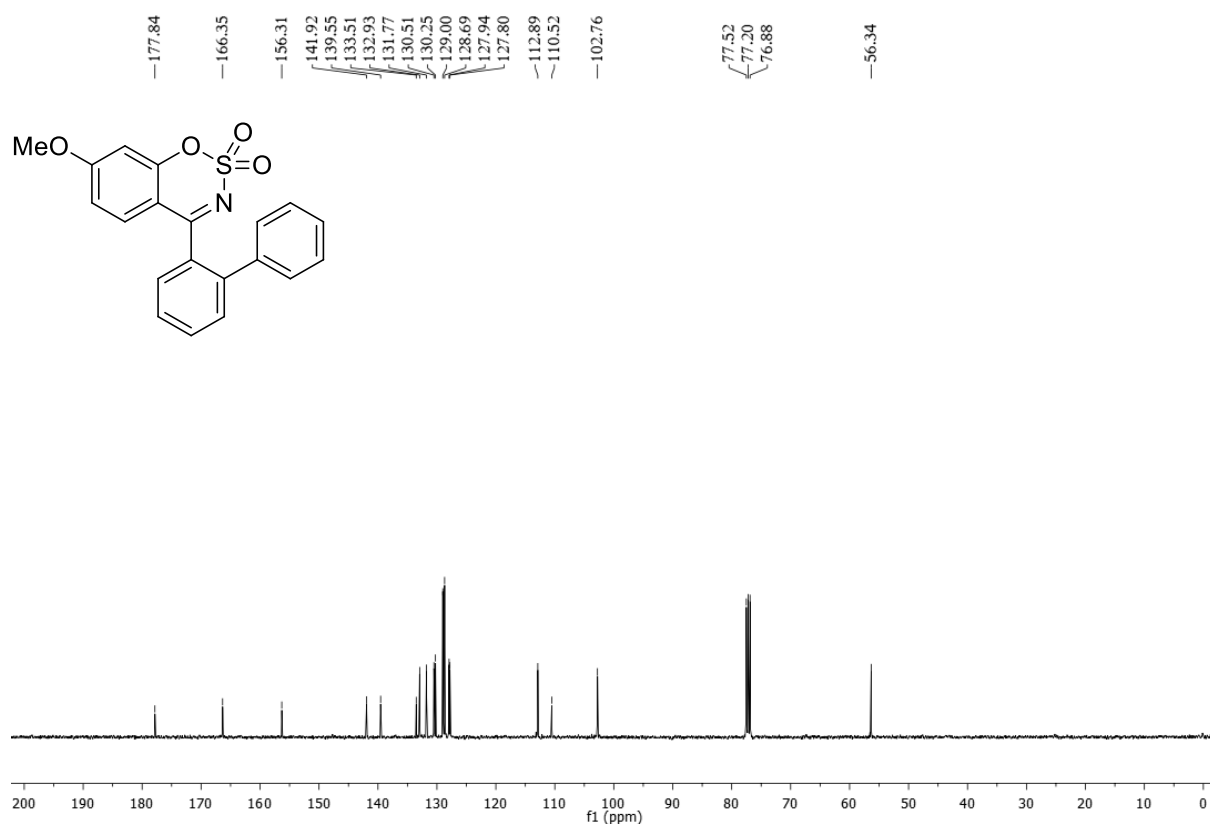

$^1\text{H}$  NMR of **5ca** (400 MHz,  $\text{CDCl}_3$ ):

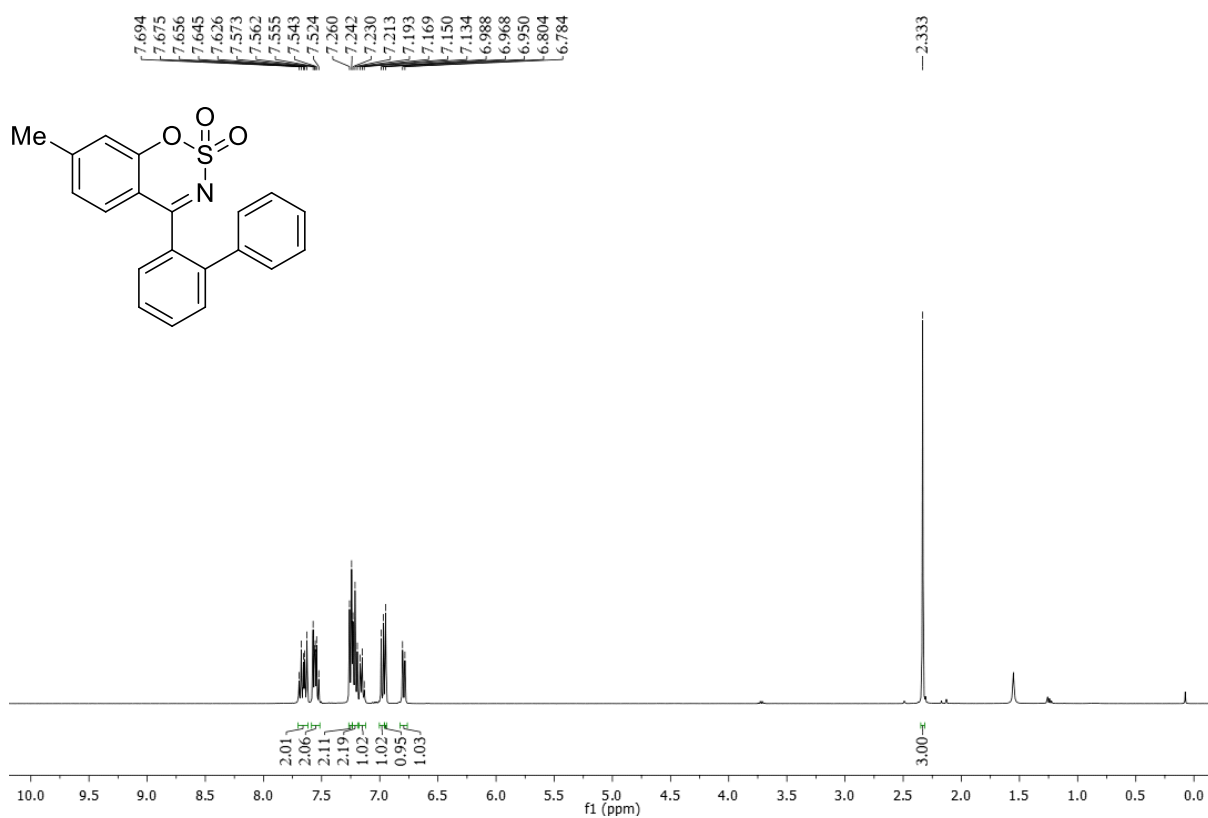

$^{13}\text{C}$  NMR of **5ca** (100 MHz,  $\text{CDCl}_3$ ):

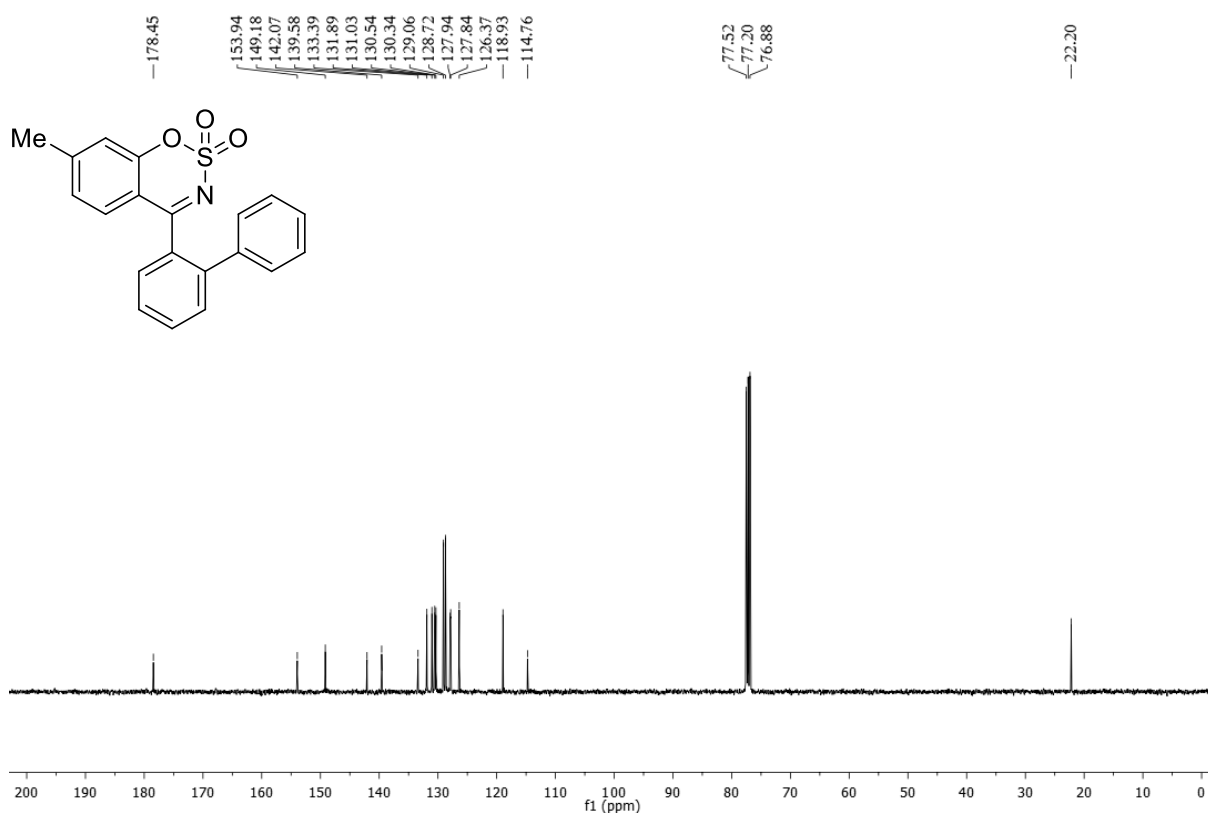

$^1\text{H}$  NMR of **5da** (400MHz,  $\text{CDCl}_3$ ):

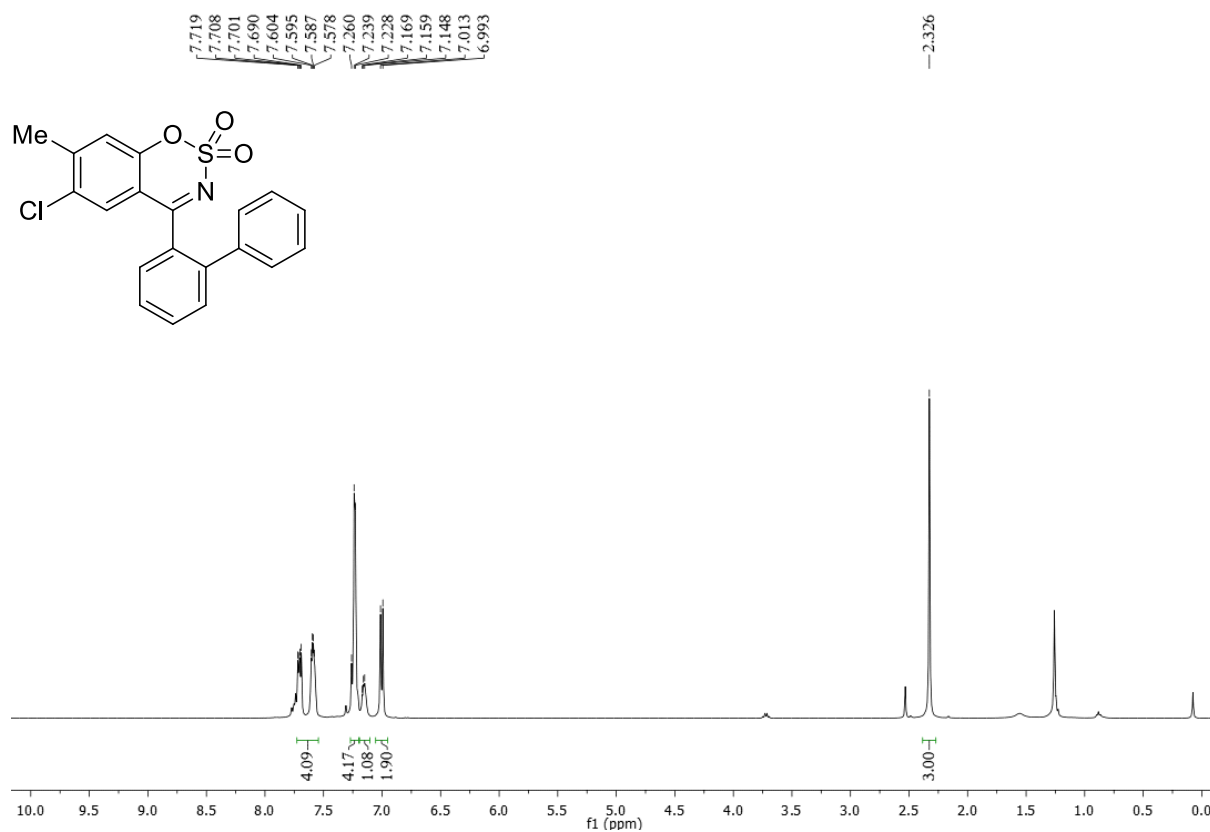

$^{13}\text{C}$  NMR of **5da** (100MHz,  $\text{CDCl}_3$ ):

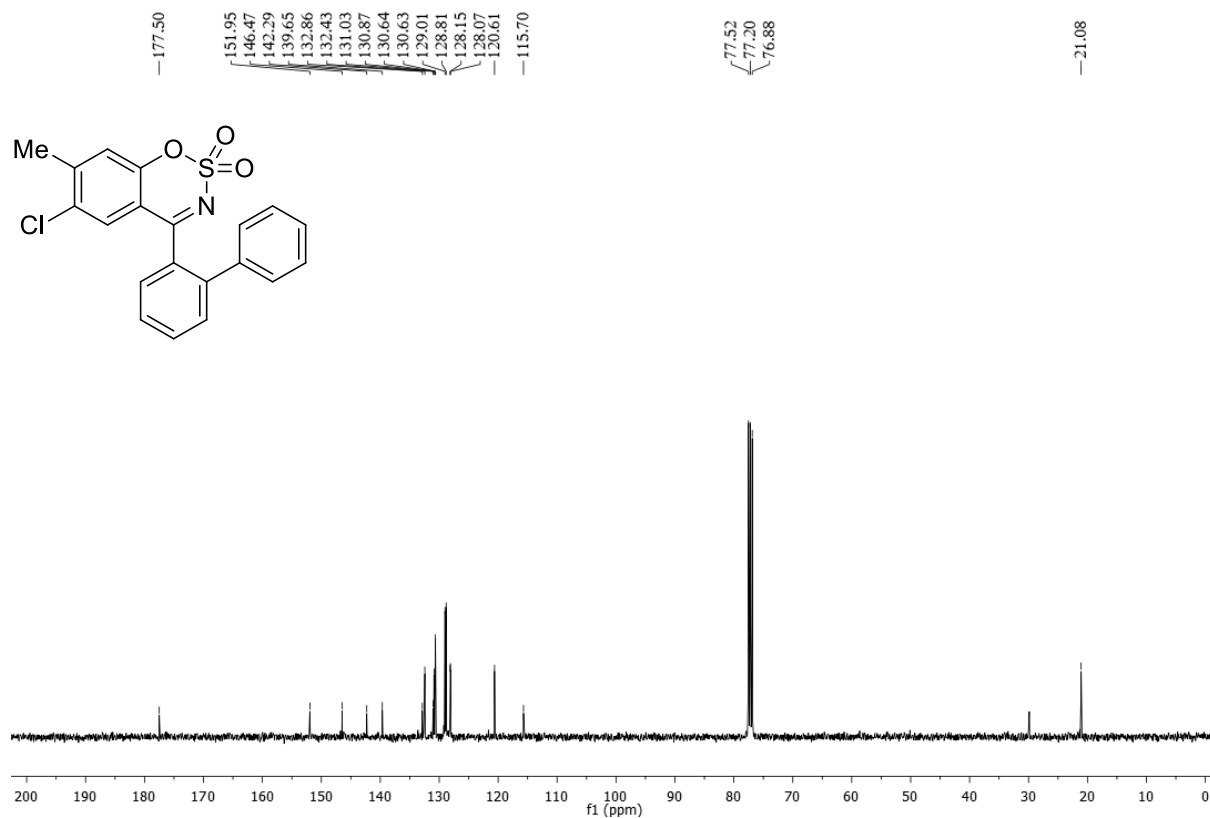

$^1\text{H}$  NMR of **5ea** (400MHz,  $\text{CDCl}_3$ ):

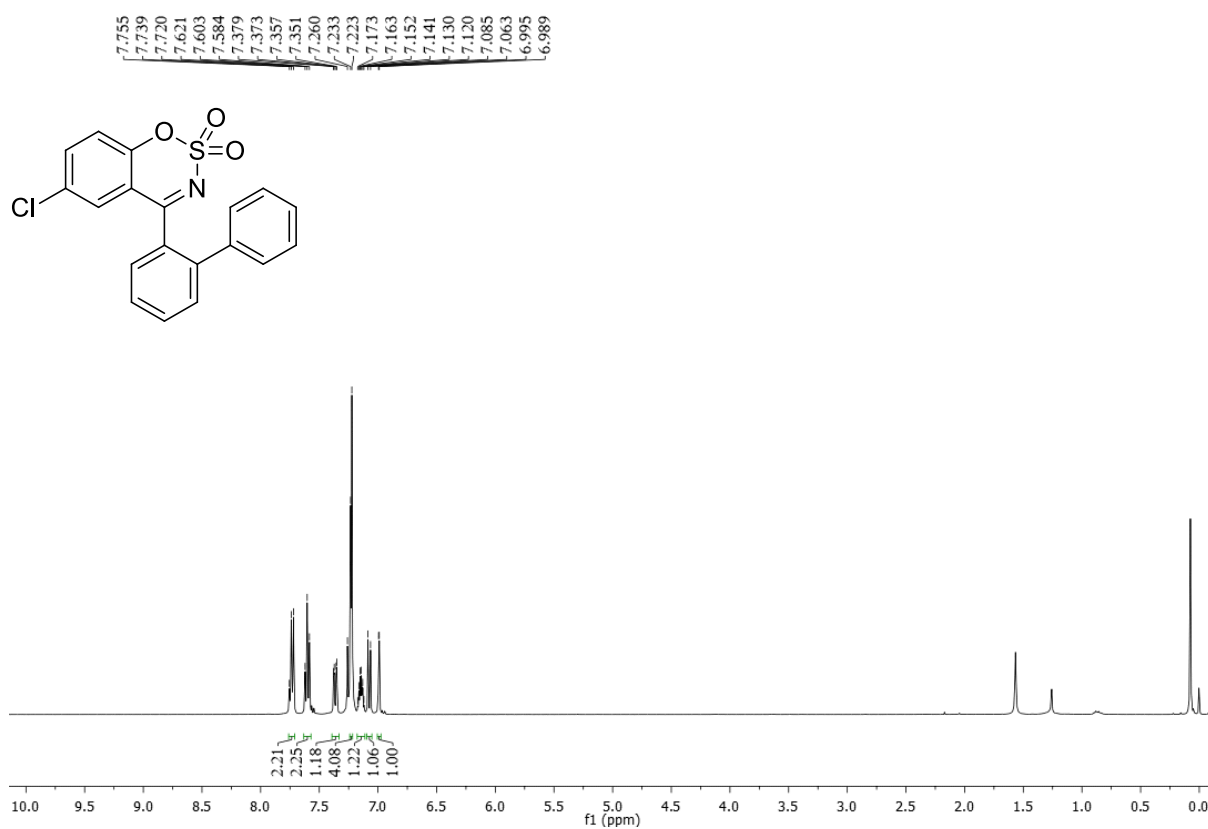

$^{13}\text{C}$  NMR of **5ea** (100MHz,  $\text{CDCl}_3$ ):

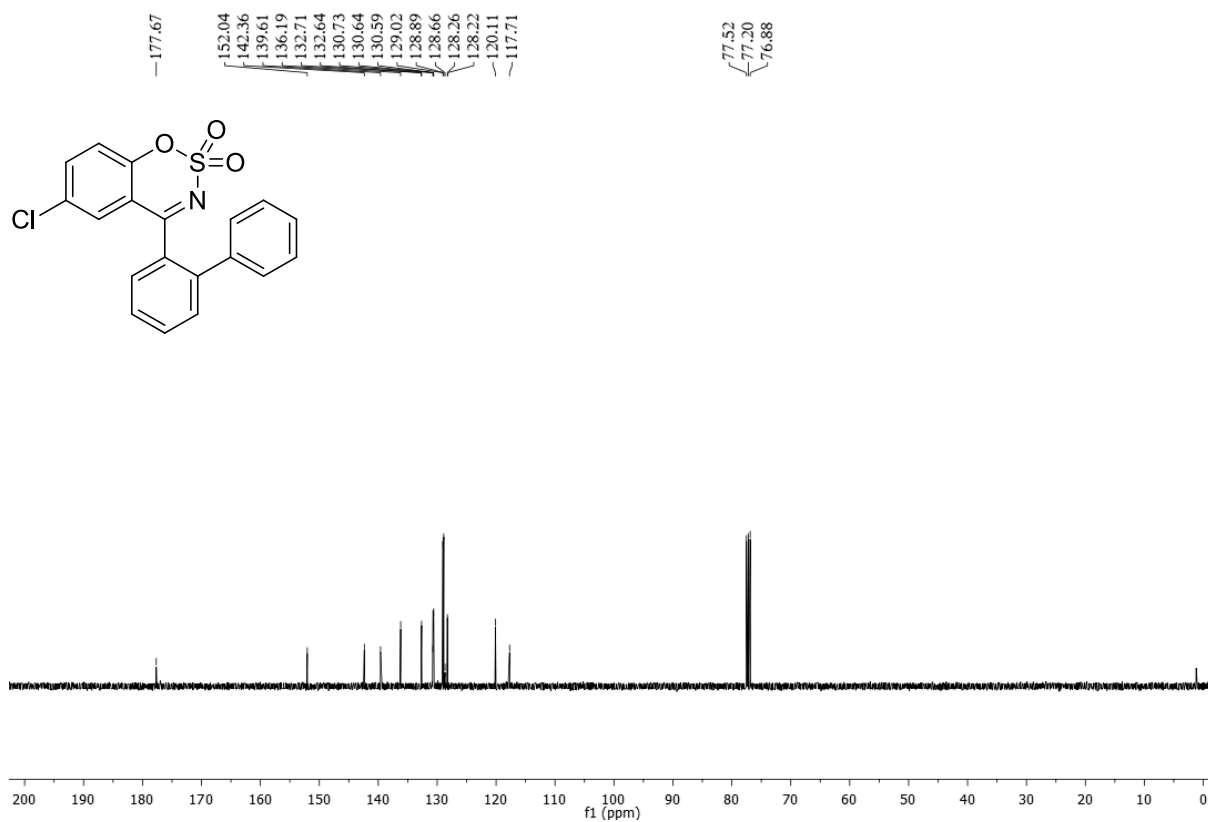

$^1\text{H}$  NMR of **5fa** (400MHz,  $\text{CDCl}_3$ ):

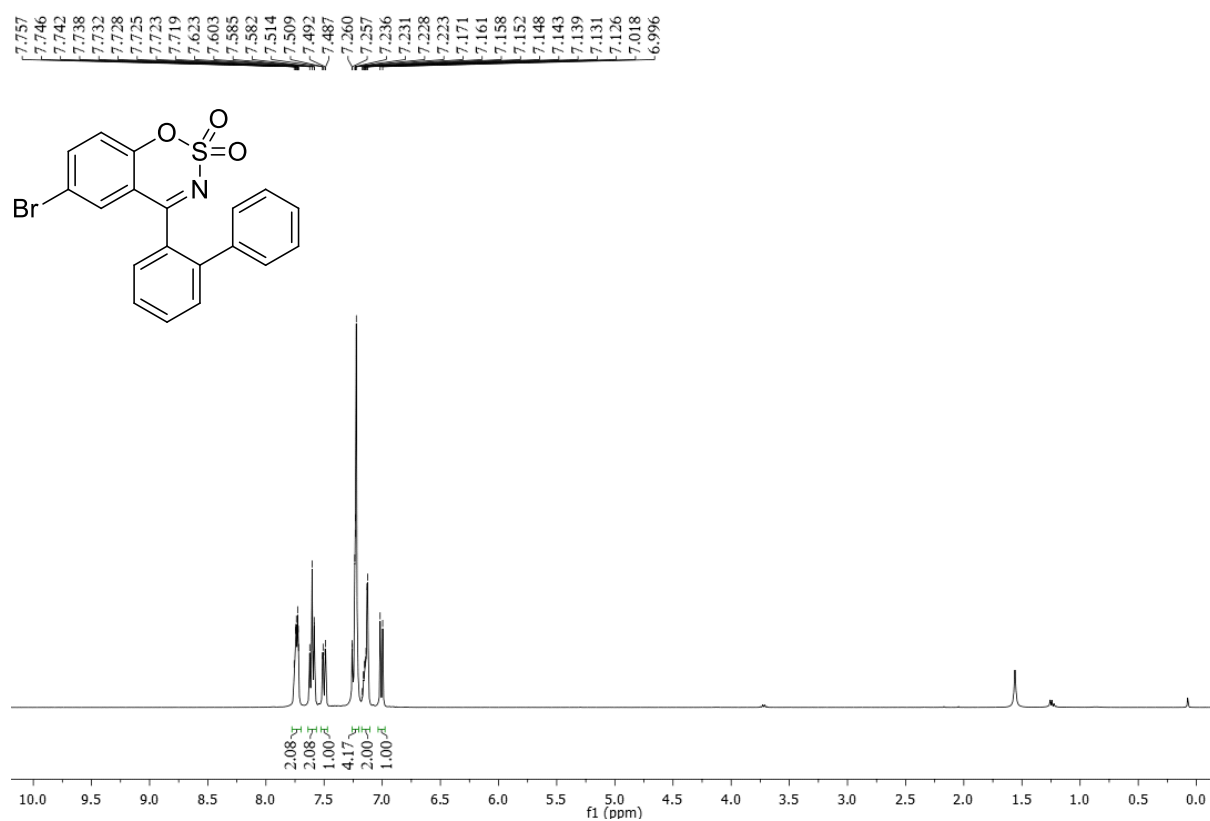

$^{13}\text{C}$  NMR of **5fa** (100MHz,  $\text{CDCl}_3$ ):

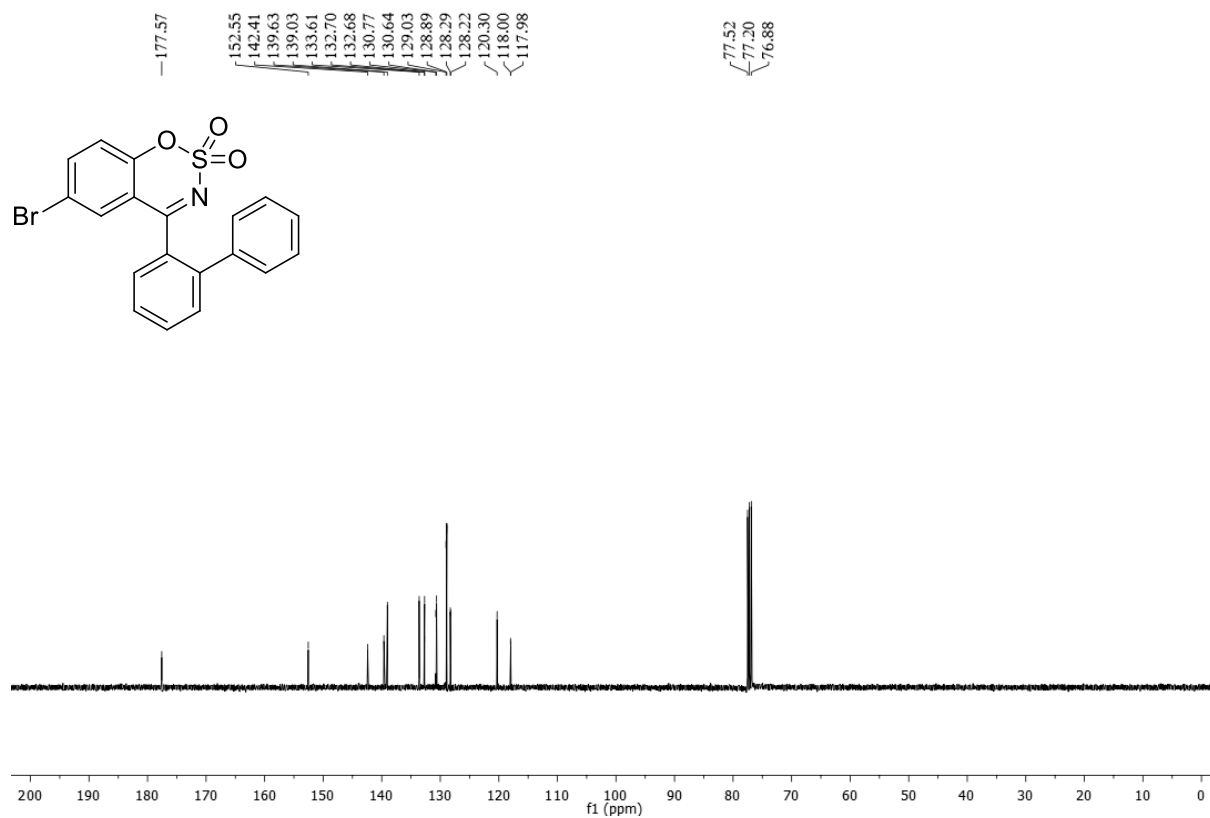

$^1\text{H}$  NMR of **5ab** (400MHz,  $\text{CDCl}_3$ ):

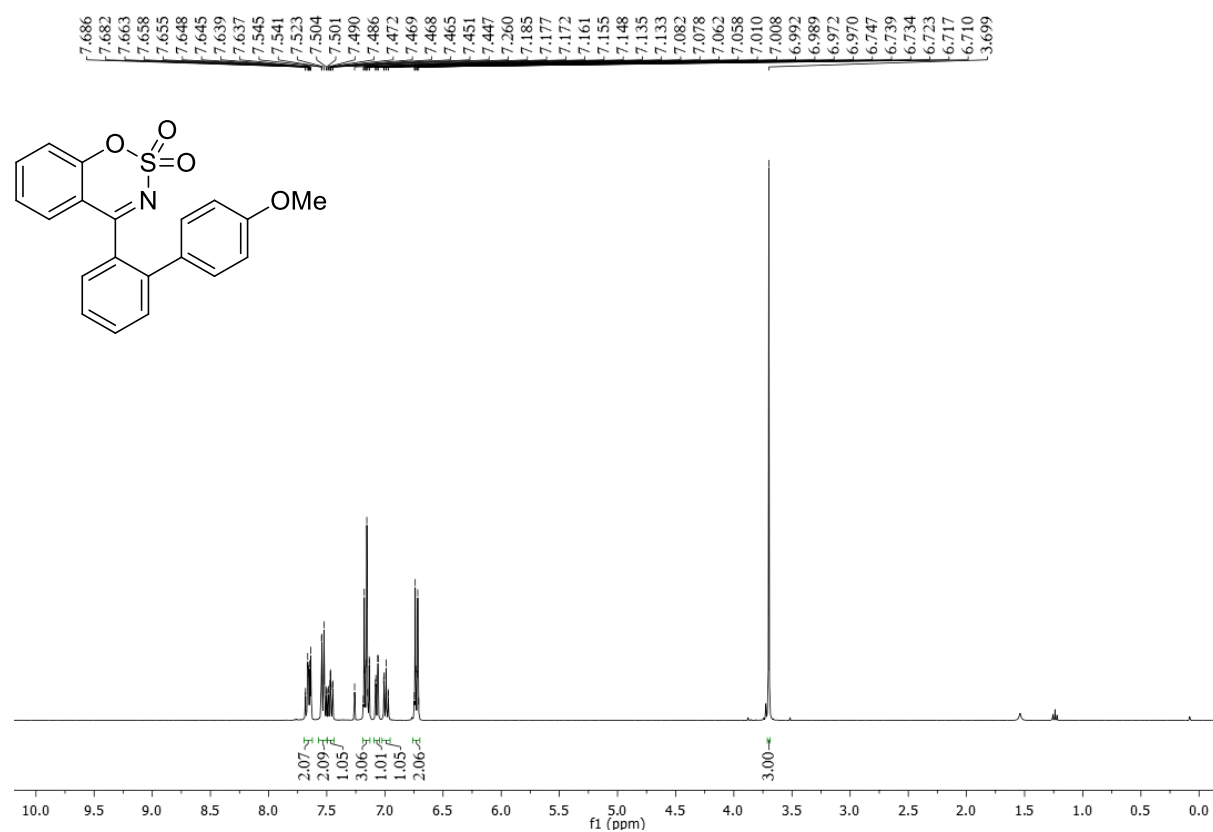

$^{13}\text{C}$  NMR of **5ab** (100MHz,  $\text{CDCl}_3$ ):

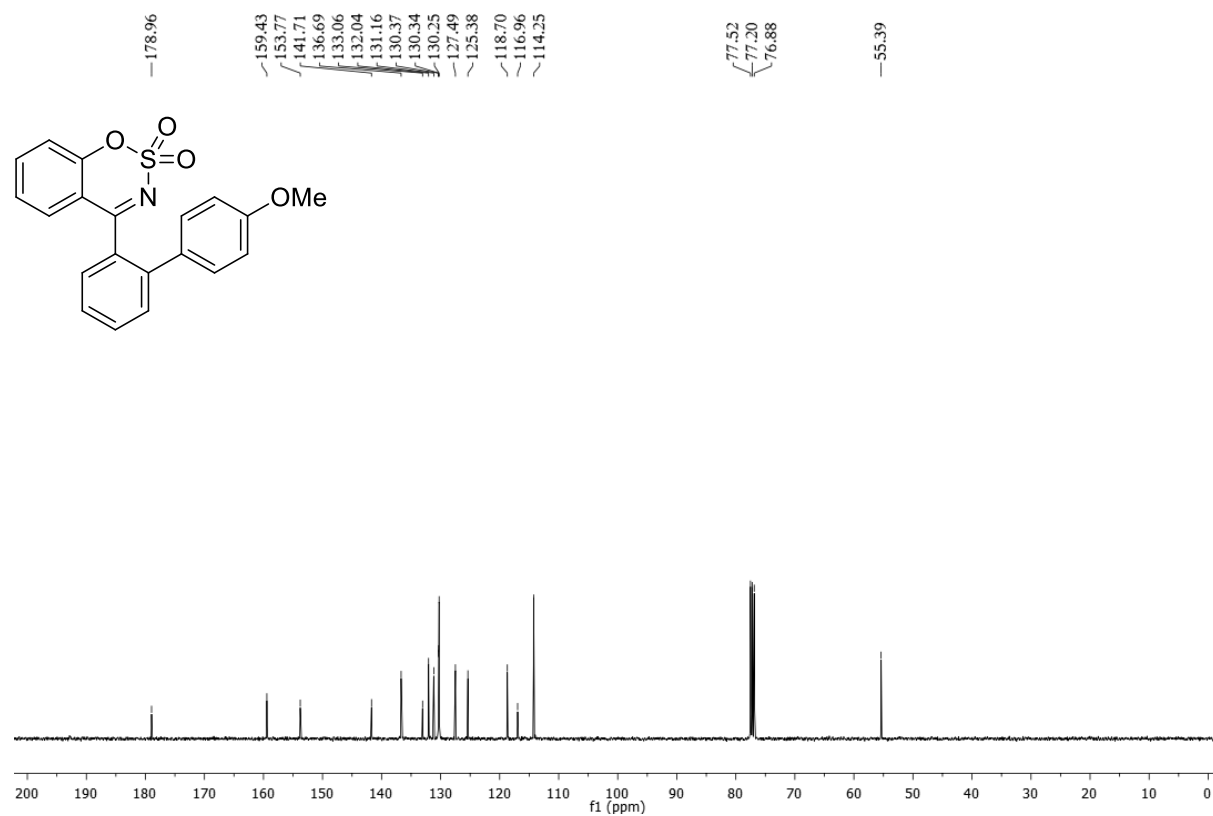

$^1\text{H}$  NMR of **5ac** (400MHz,  $\text{CDCl}_3$ ):

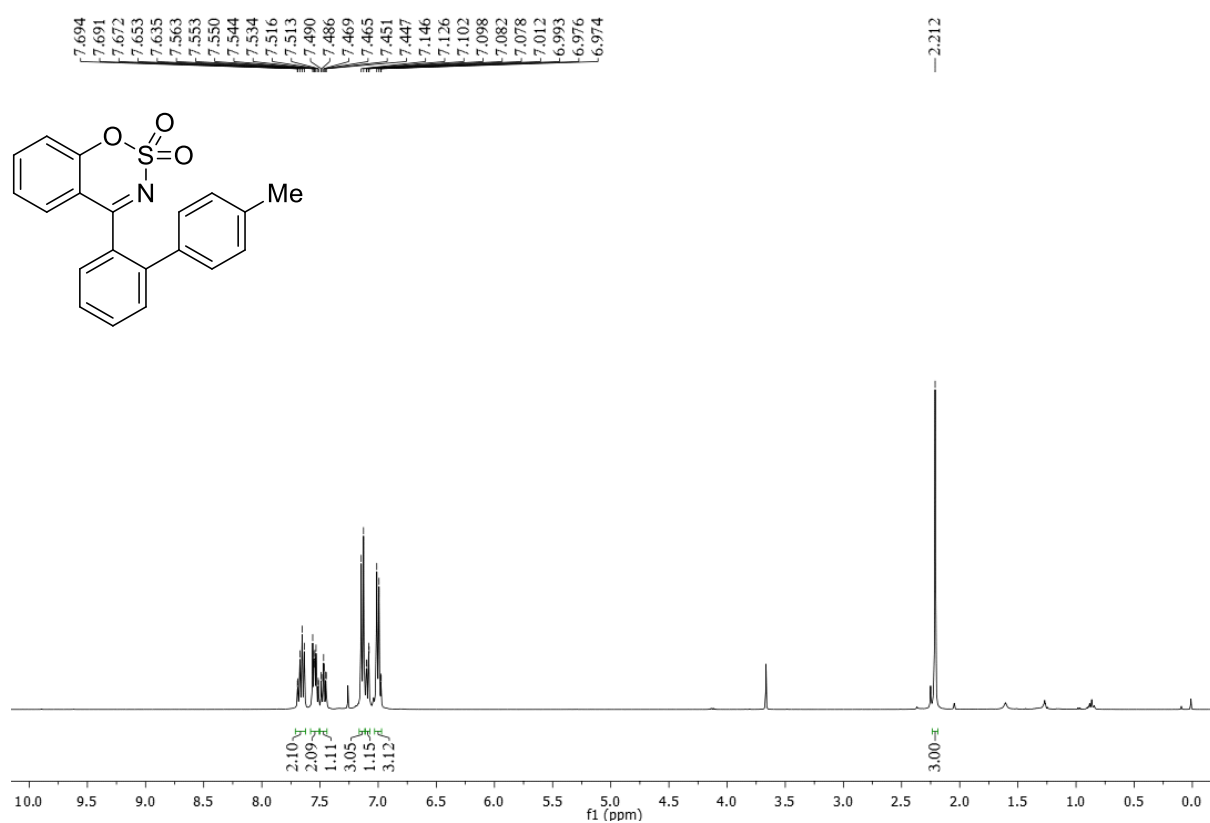

$^{13}\text{C}$  NMR of **5ac** (100MHz,  $\text{CDCl}_3$ ):

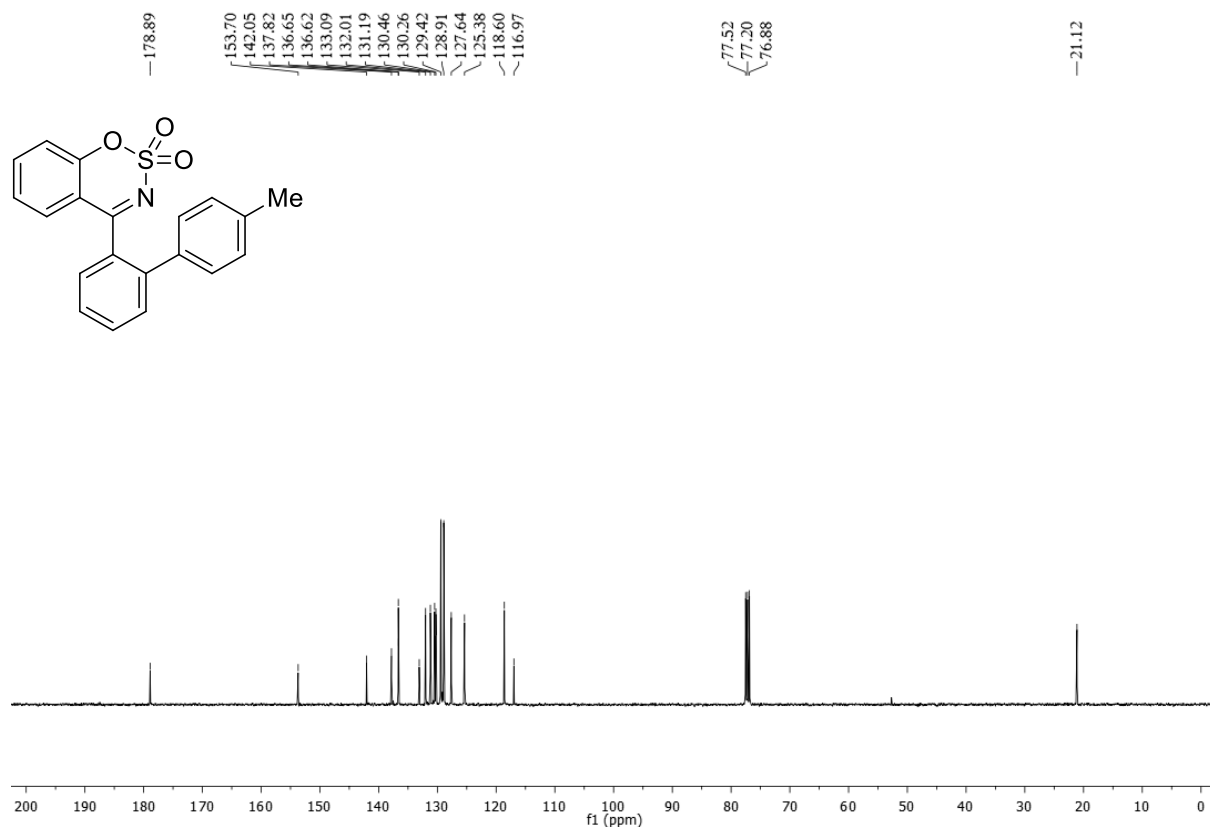

$^1\text{H}$  NMR of **5ad** (400MHz,  $\text{CDCl}_3$ ):

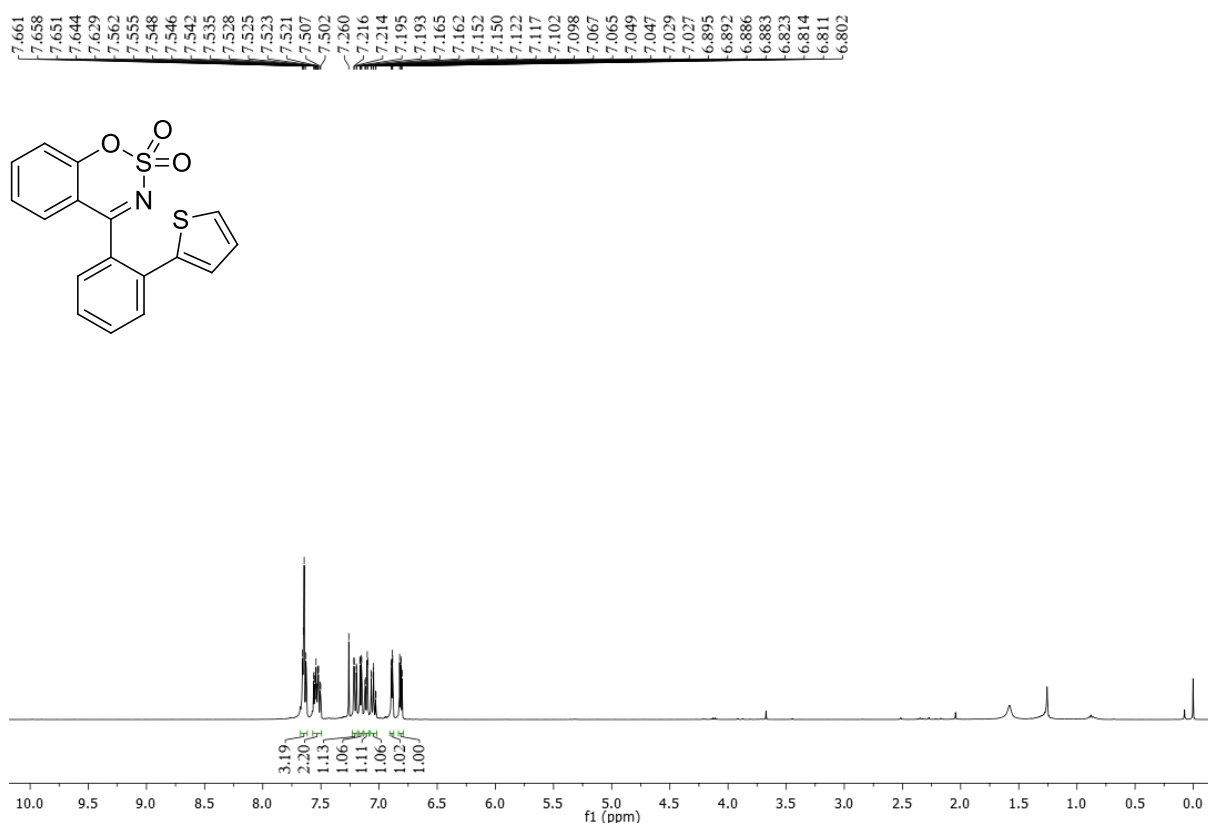

$^{13}\text{C}$  NMR of **5ad** (100MHz,  $\text{CDCl}_3$ ):

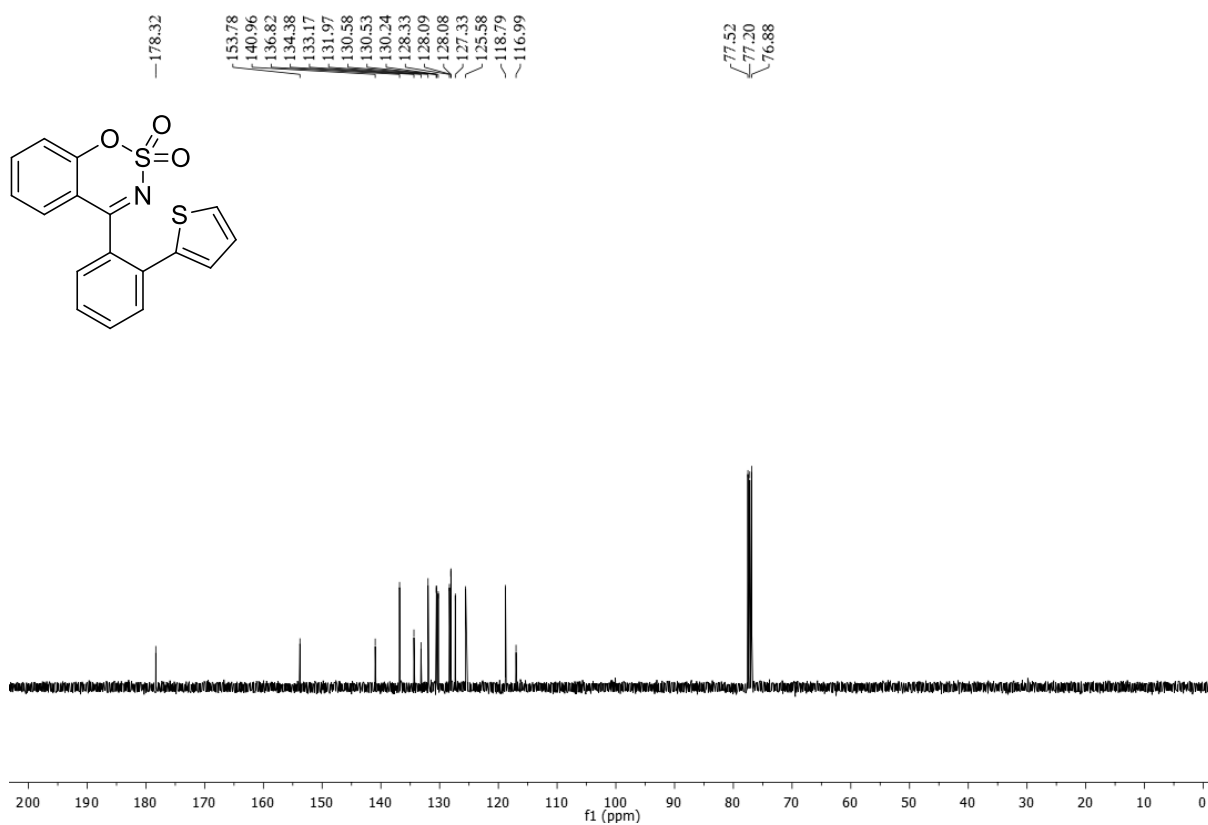

$^1\text{H}$  NMR of **5ae** (400MHz,  $\text{CDCl}_3$ ):

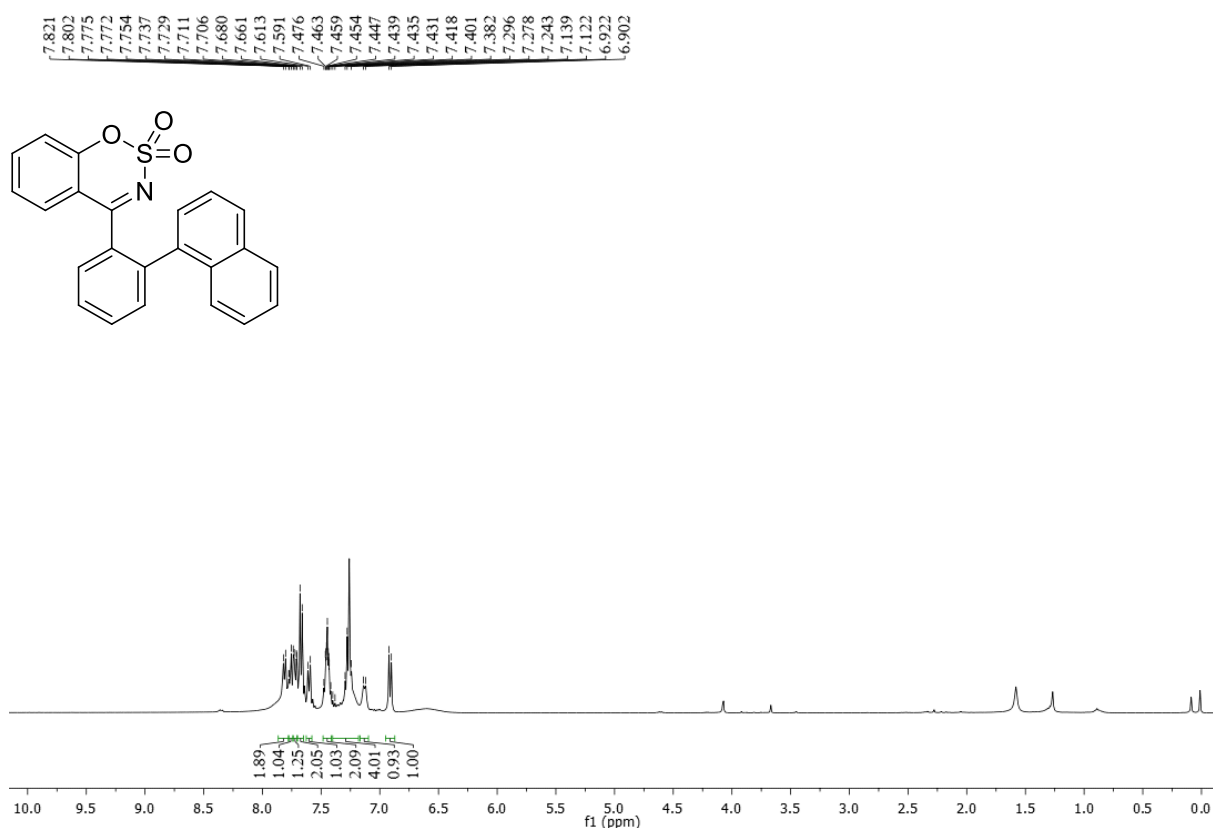

$^{13}\text{C}$  NMR of **5ae** (100MHz,  $\text{CDCl}_3$ ):

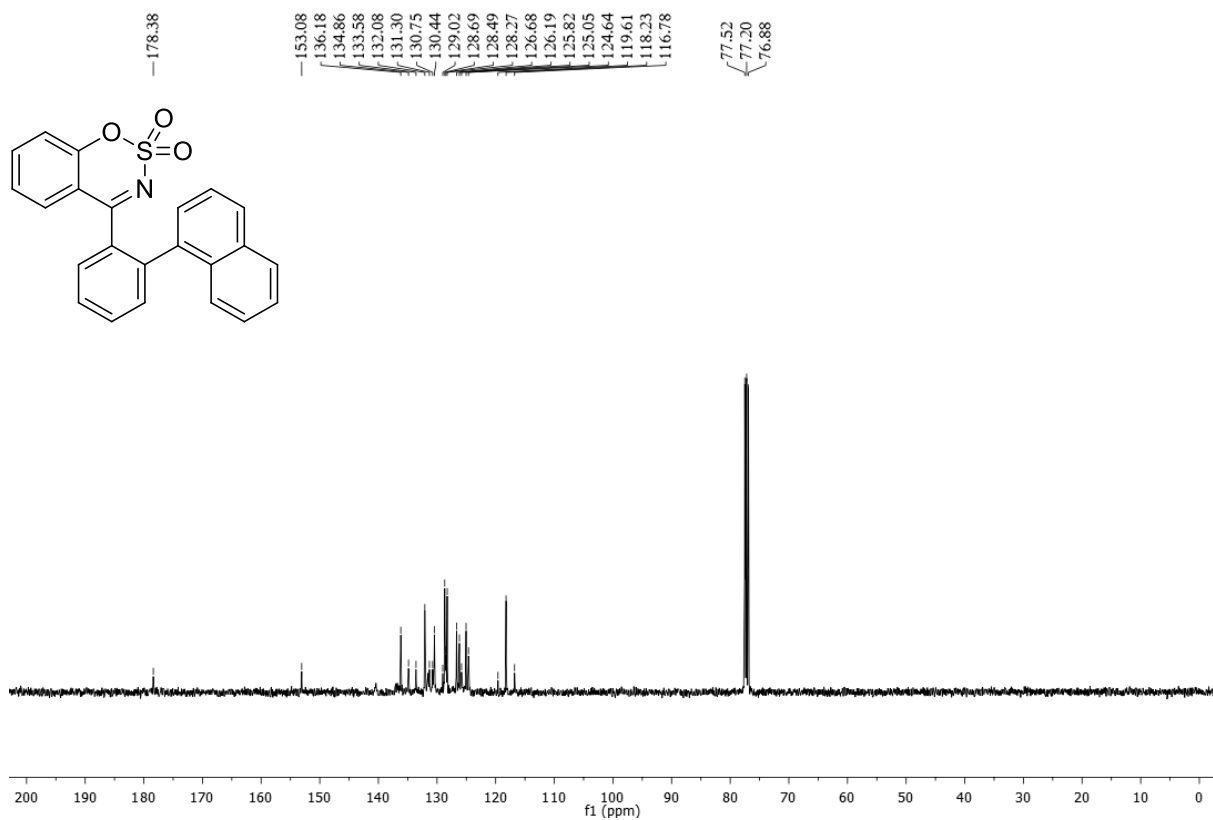

$^1\text{H}$  NMR of **5bb** (400MHz,  $\text{CDCl}_3$ ):

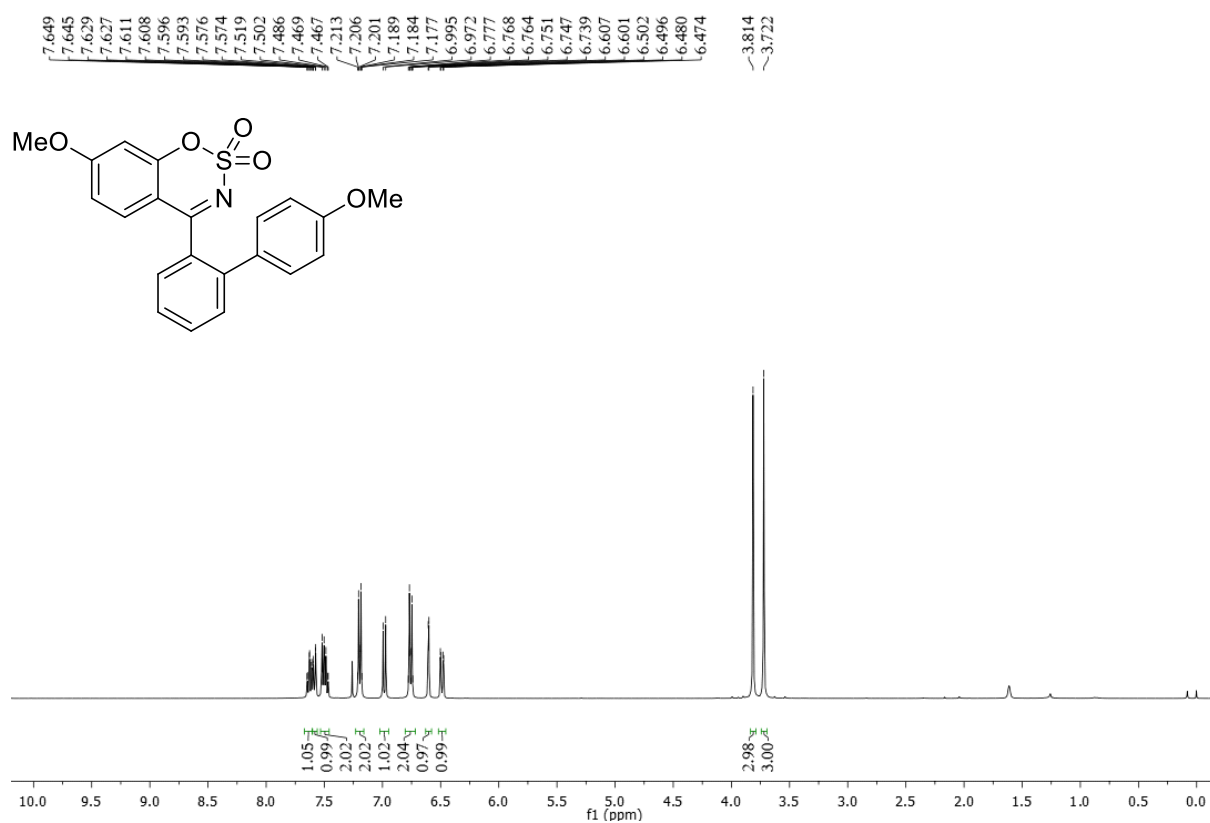

$^{13}\text{C}$  NMR of **5bb** (100MHz,  $\text{CDCl}_3$ ):

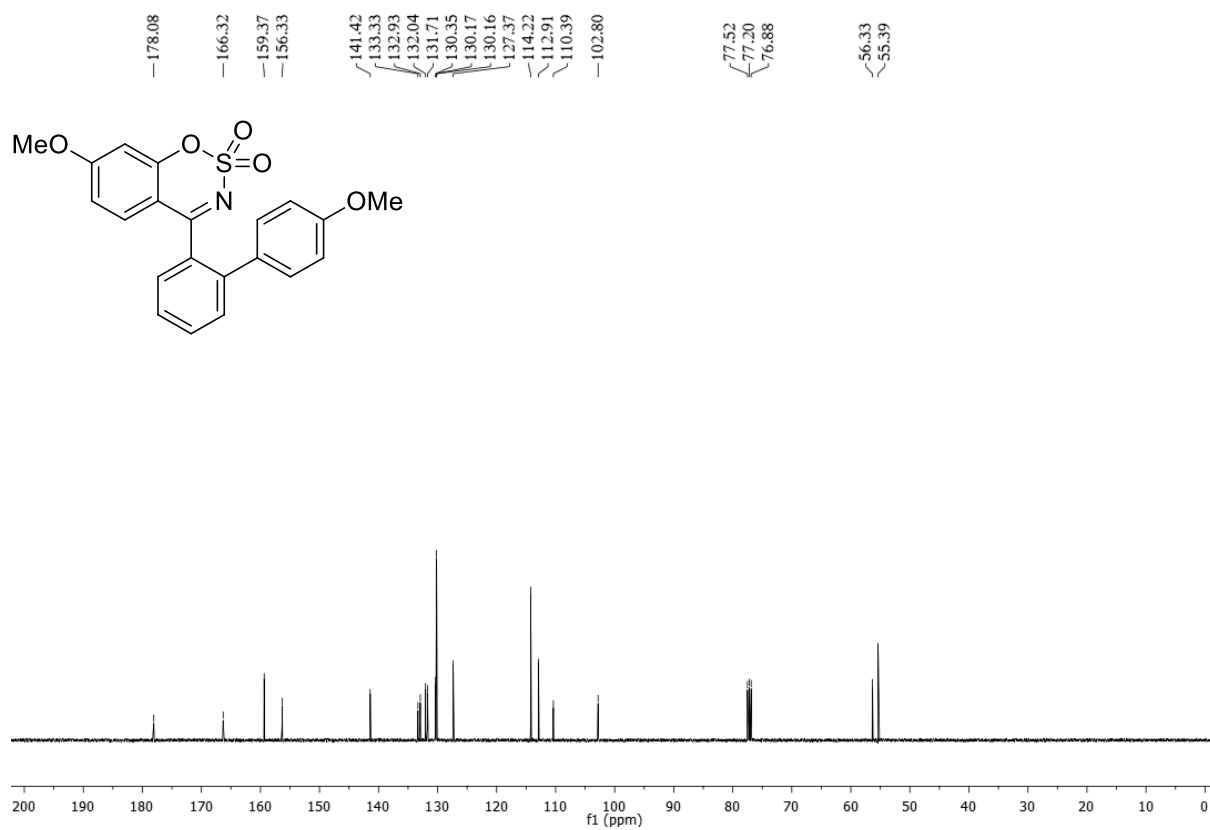

$^1\text{H}$  NMR of **5cb** (400MHz,  $\text{CDCl}_3$ ):

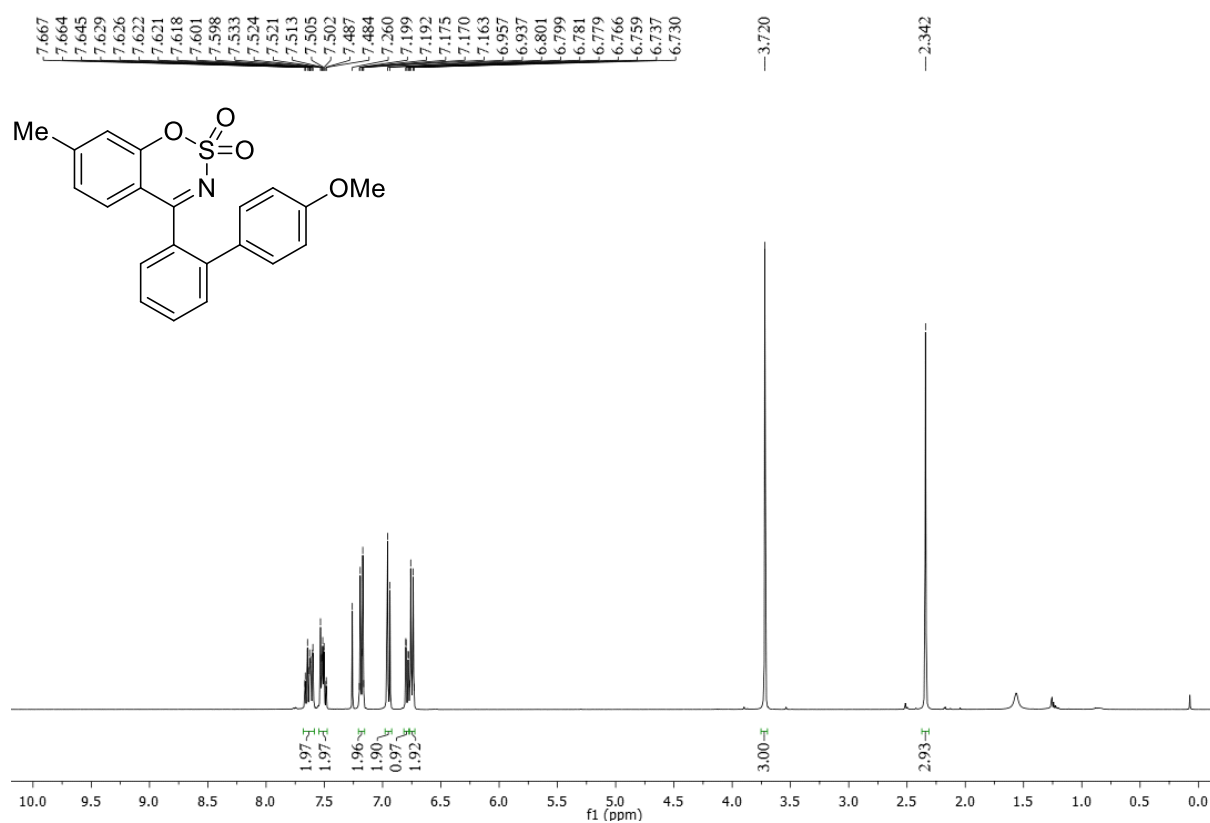

$^{13}\text{C}$  NMR of **5cb** (100MHz,  $\text{CDCl}_3$ ):

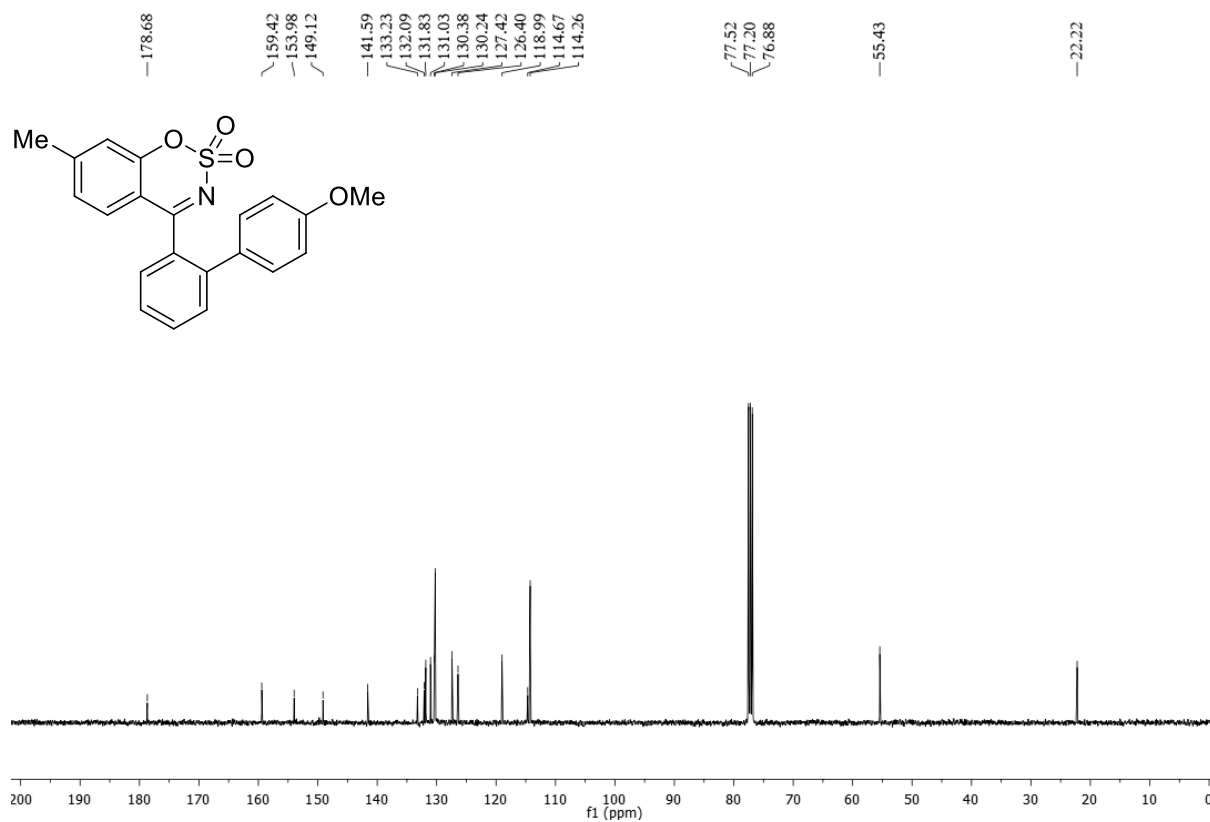

$^1\text{H}$  NMR of **5db** (400MHz,  $\text{CDCl}_3$ ):

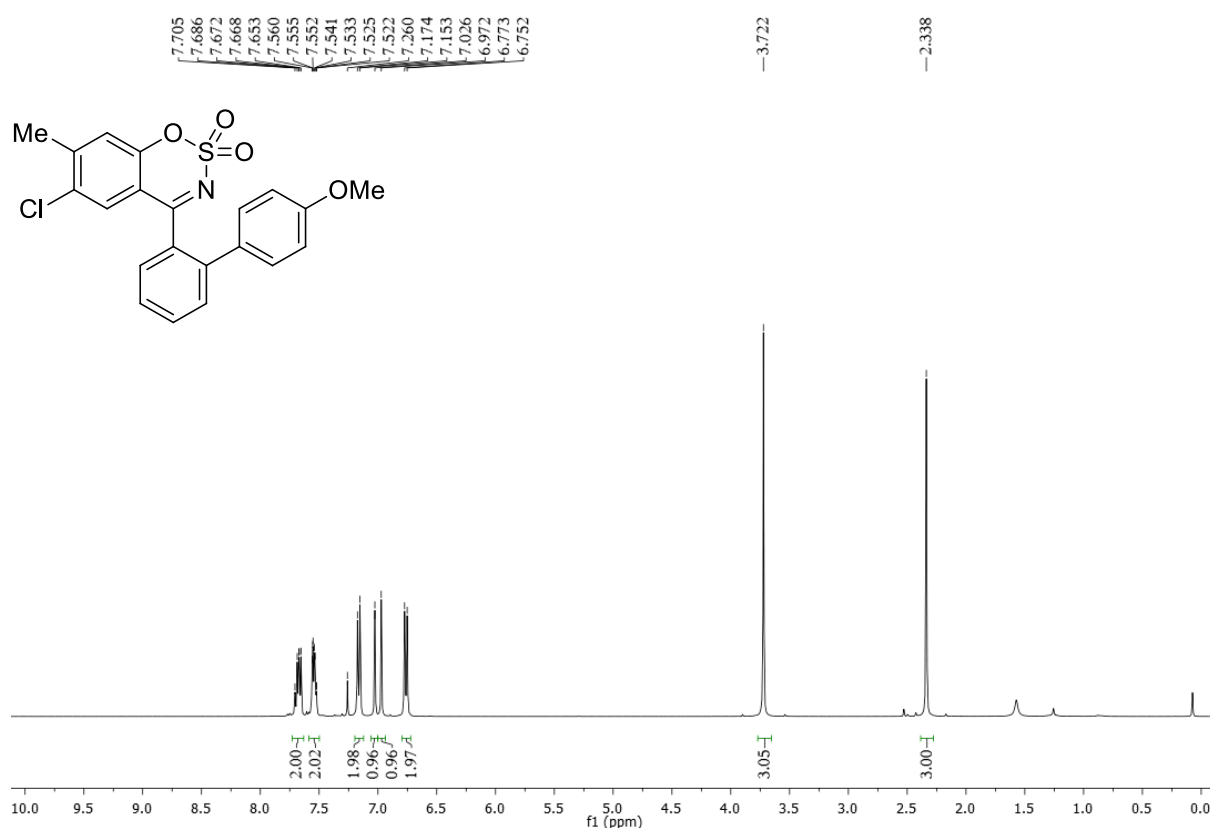

$^{13}\text{C}$  NMR of **5db** (100MHz,  $\text{CDCl}_3$ ):

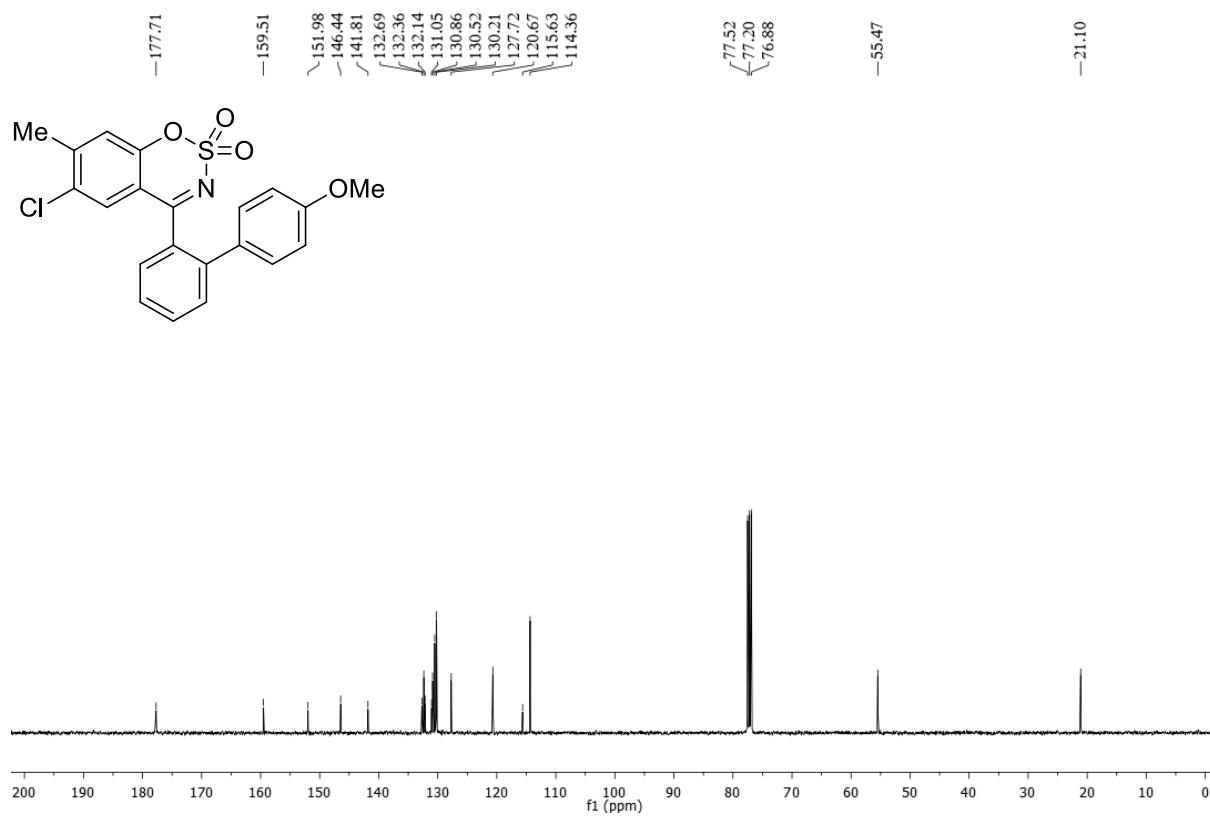

$^1\text{H}$  NMR of **5eb** (400MHz,  $\text{CDCl}_3$ ):

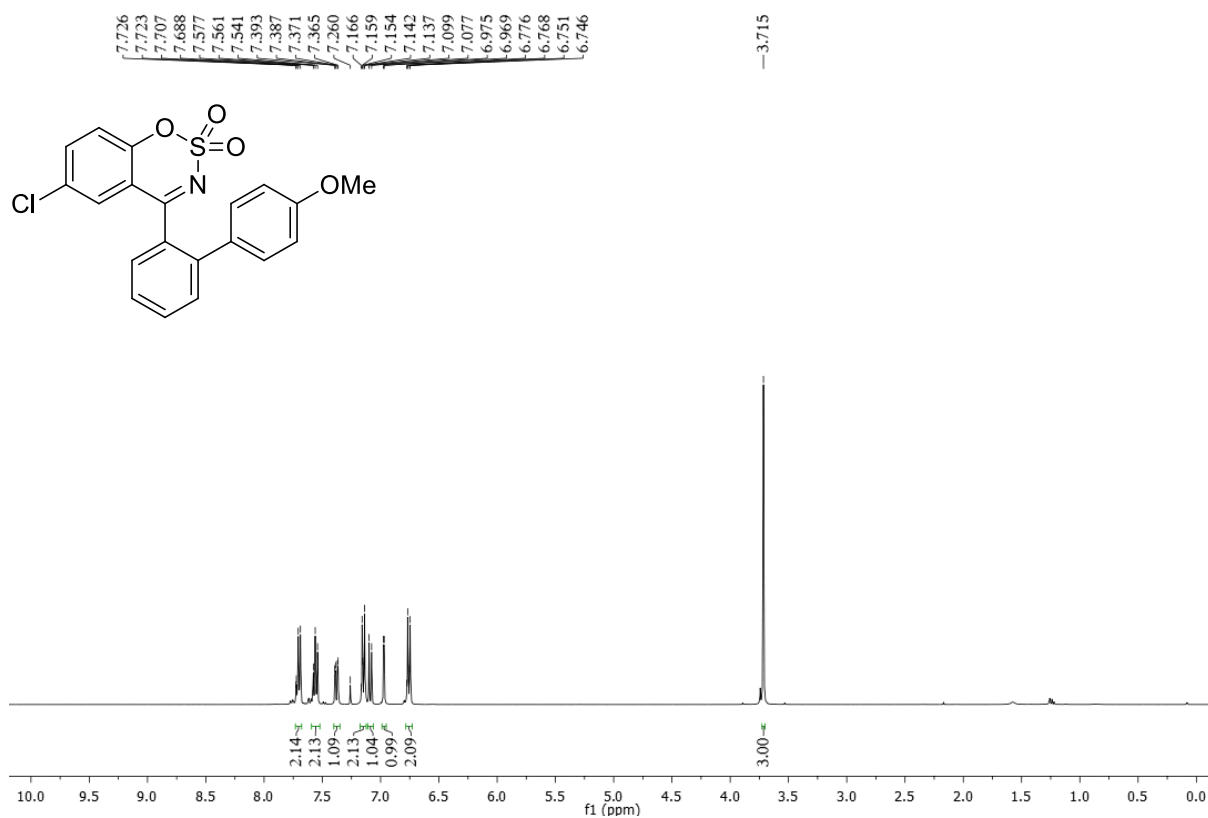

$^{13}\text{C}$  NMR of **5eb** (100MHz,  $\text{CDCl}_3$ ):

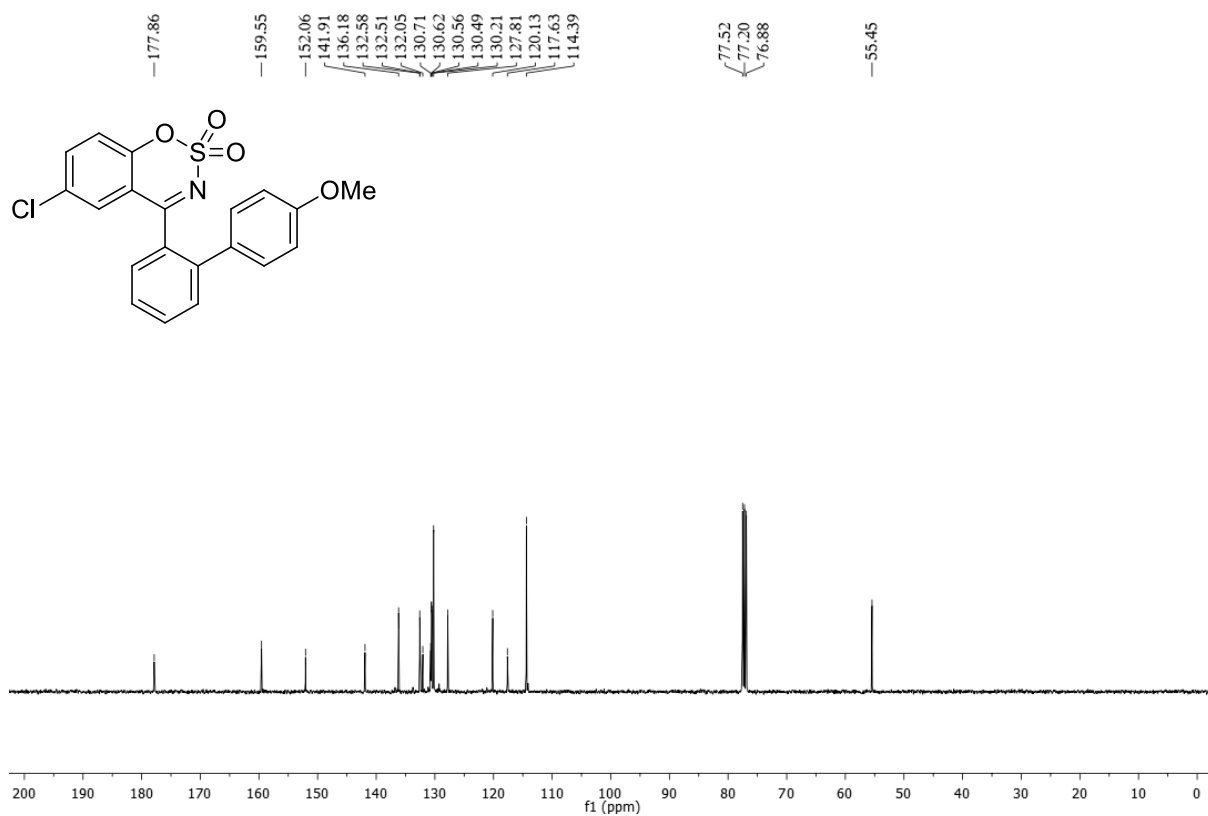

$^1\text{H}$  NMR of **5fb** (400MHz,  $\text{CDCl}_3$ ):

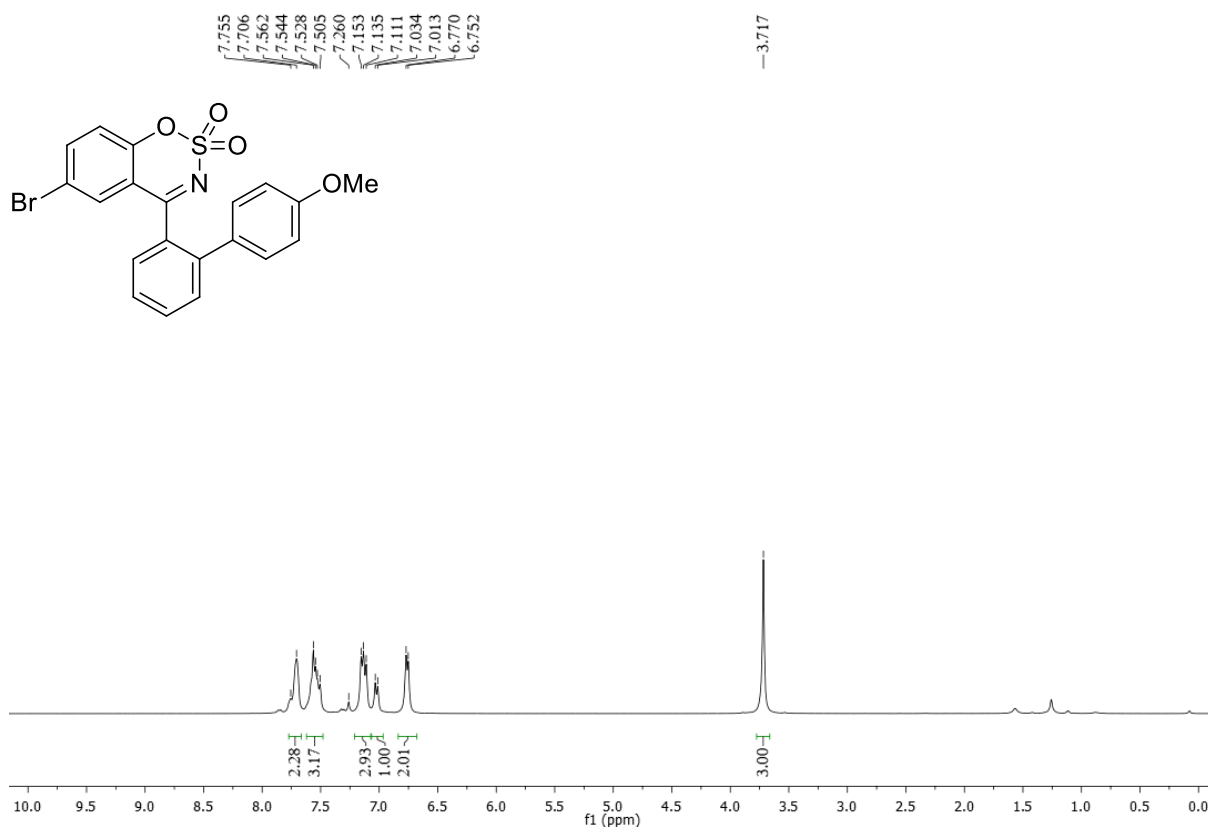

$^{13}\text{C}$  NMR of **5fb** (100MHz,  $\text{CDCl}_3$ ):

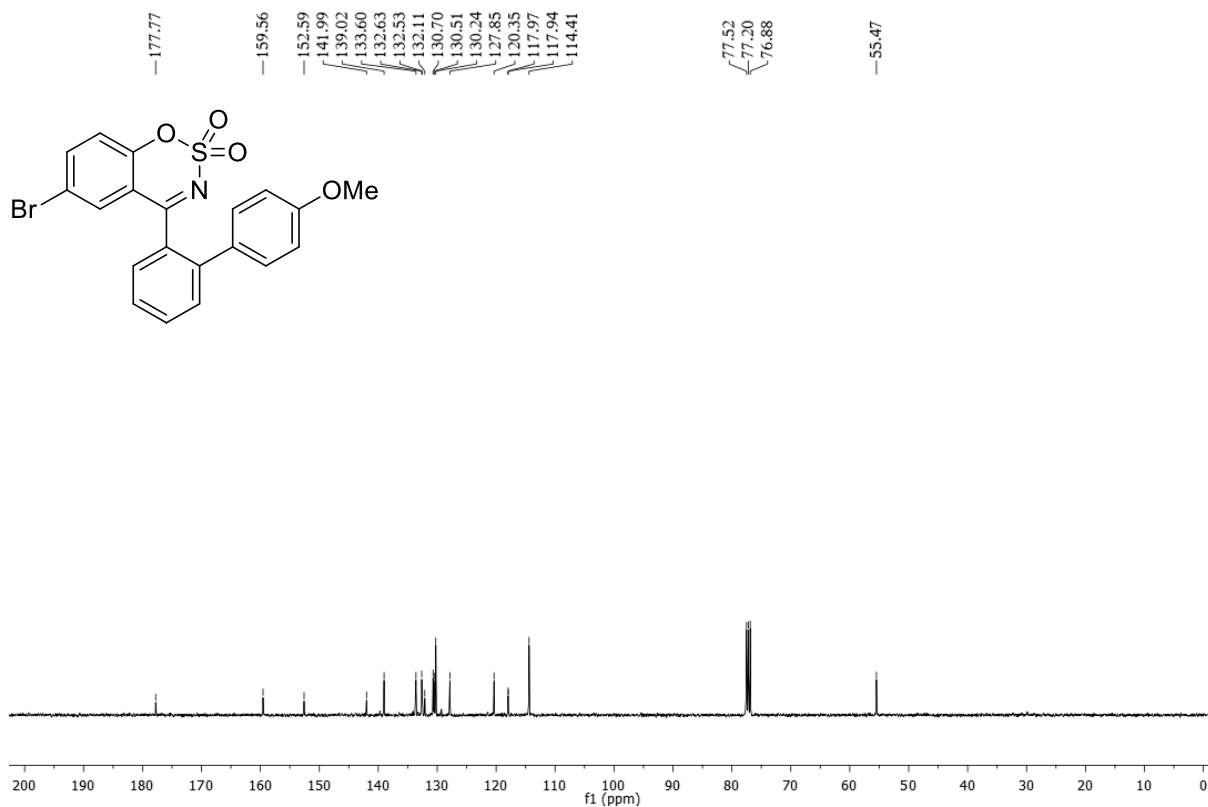

$^1\text{H}$  NMR of **6** (400MHz,  $\text{CDCl}_3$ ):

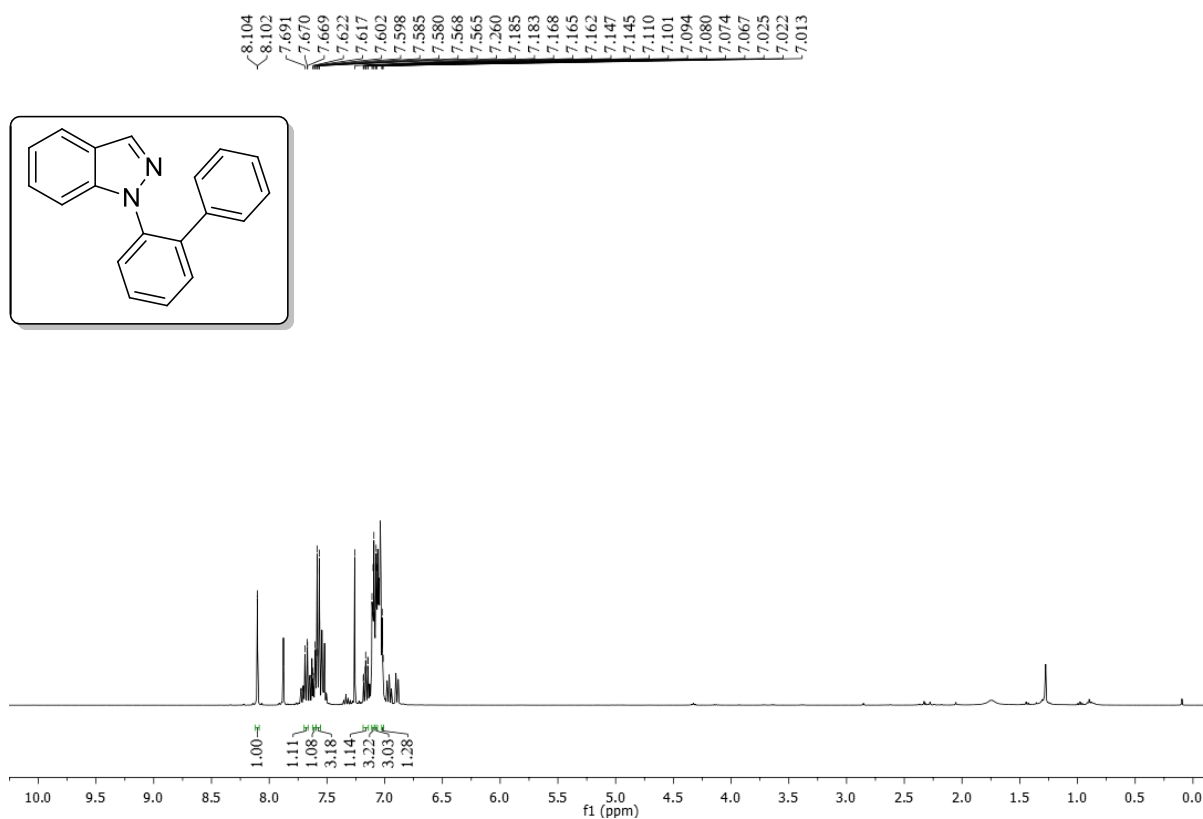

$^1\text{H}$  NMR of **7** (400MHz,  $\text{CDCl}_3$ ):

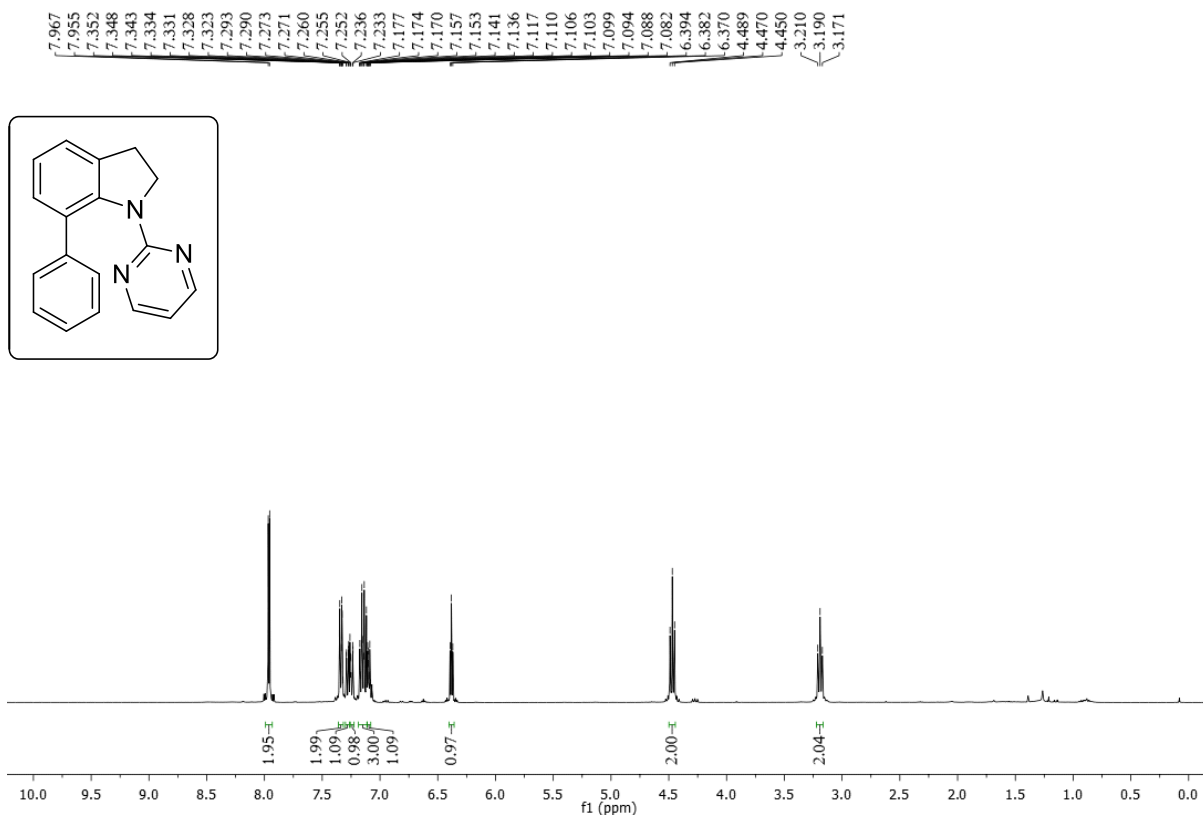

$^1\text{H}$  NMR of **8** (400MHz,  $\text{CDCl}_3$ ):

7.734, 7.731, 7.715, 7.712, 7.668, 7.665, 7.649, 7.646, 7.630, 7.627, 7.560, 7.556, 7.541, 7.537, 7.521, 7.518, 7.497, 7.494, 7.478, 7.475, 7.455, 7.453, 7.436, 7.434, 7.417, 7.415, 7.365, 7.363, 7.346, 7.344, 7.327, 7.325, 7.302, 7.299, 7.281, 7.279, 7.260, 7.204, 7.185, 7.166, 7.093, 7.074, 7.054, 7.035

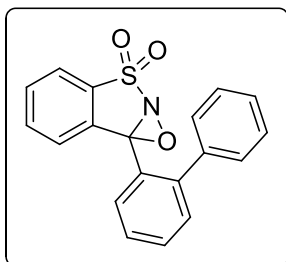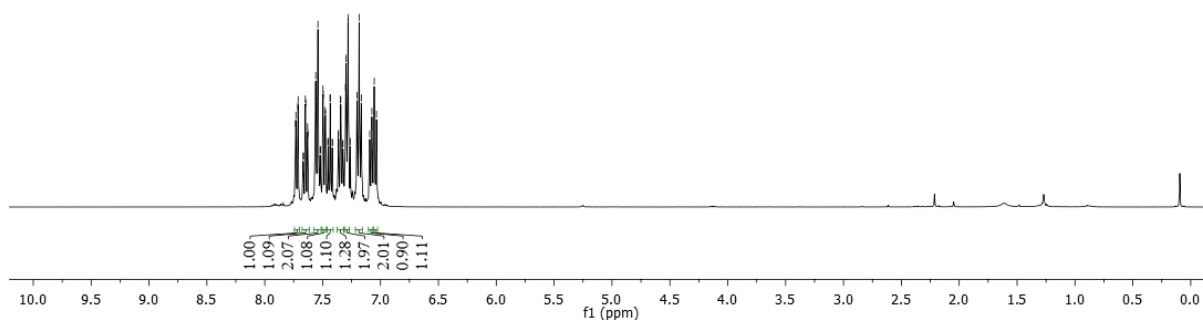

$^{13}\text{C}$  NMR of **8** (100MHz,  $\text{CDCl}_3$ ):

142.84, 139.38, 135.44, 133.20, 132.98, 131.98, 131.41, 130.95, 129.41, 128.81, 128.74, 128.01, 127.85, 127.19, 126.54, 123.29, 85.79, 77.52, 77.20, 76.88

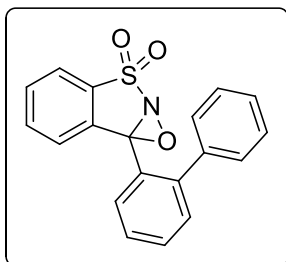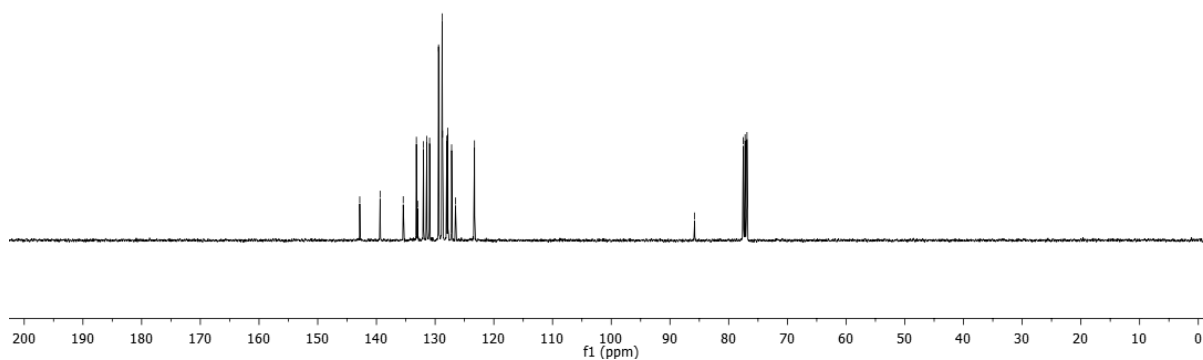

Supplement: d0ob01212b1.pdf [file d0ob01212b1.pdf]
